# Supplementary material for: Depletion of activated macrophages with a folate receptor-beta-specific antibody improves symptoms in mouse models of rheumatoid arthritis
Source: PubMed Central journal article supplement (PMC6555977; doi:10.1186/s13075-019-1912-0), 2019-06-07
Supplement: 13075_2019_1912_MOESM1_ESM.pdf [file 13075_2019_1912_MOESM1_ESM.pdf]

# Supplementary Information

# Table of Contents

## FR- $\beta$ IHC images from human inflammatory and autoimmune diseases

|                                             |                 |
|---------------------------------------------|-----------------|
| Crohn's Disease .....                       | SI Figure 1-3   |
| Ulcerative Colitis .....                    | SI Figure 4-5   |
| Normal Lung .....                           | SI Figure 6-8   |
| Idiopathic Pulmonary Fibrosis .....         | SI Figure 9-11  |
| Nonspecific Interstitial Pneumonia .....    | SI Figure 12-14 |
| Chronic Obstructive Pulmonary Disease ..... | SI Figure 15-17 |
| Rheumatoid Arthritis .....                  | SI Figure 18-20 |
| Systemic Lupus Erythematosus .....          | SI Figure 21    |
| Psoriasis .....                             | SI Figure 22    |
| Scleroderma .....                           | SI Figure 23    |

## Antibody Dependent Cell Cytotoxicity (ADCC)

|                                                                                                   |              |
|---------------------------------------------------------------------------------------------------|--------------|
| ADCC control antibody .....                                                                       | SI Figure 24 |
| Percentage of FR- $\beta$ positive PBMCs and M1-/M2-differentiated macrophages .....              | SI Figure 25 |
| Statistical analysis of differences in ADCC of M1 and M2 macrophages (from <b>Fig. 2C</b> ) ..... | SI Figure 26 |
| Effect of human serum on m909-mediated ADCC .....                                                 | SI Figure 27 |

## Thioglycollate Model

|                                                                                                       |              |
|-------------------------------------------------------------------------------------------------------|--------------|
| Statistical analysis of differences in immune cell accumulation (from <b>Fig. 3A</b> ) .....          | SI Figure 28 |
| Quantitation of FR- $\beta$ positive immune cell subpopulations (from <b>Fig. 3B</b> ) .....          | SI Figure 29 |
| Statistical analysis of differences in FR- $\beta$ positive immune cells (from <b>Fig. 3B</b> ) ..... | SI Figure 30 |
| Statistical analysis of differences in immune cell numbers (from <b>Fig. 3C</b> ) .....               | SI Figure 31 |
| Statistical analysis of differences in macrophage numbers (from <b>Fig. 3D</b> ) .....                | SI Figure 32 |

## F3 Biodistribution

|                                                                             |              |
|-----------------------------------------------------------------------------|--------------|
| Time dependence of F3 uptake in arthritic mice (from <b>Fig. 4B</b> ) ..... | SI Figure 33 |
|-----------------------------------------------------------------------------|--------------|

# Table of Contents - Continued

## Adjuvant-induced arthritis prophylactic treatment model

|                                                                                      |              |
|--------------------------------------------------------------------------------------|--------------|
| Arthritis score measurements (from <b>Fig. 5A</b> ) .....                            | SI Figure 34 |
| Statistical analysis of differences in arthritis scores (from <b>Fig. 5A</b> ) ..... | SI Figure 35 |
| Body weight measurements (from <b>Fig. 5A</b> ) .....                                | SI Figure 36 |
| Statistical analysis of differences in body weight (from <b>Fig. 5A</b> ) .....      | SI Figure 37 |

## Adjuvant-induced arthritis therapeutic model – dose finding study

|                                                                                     |              |
|-------------------------------------------------------------------------------------|--------------|
| Paw thickness measurements (from <b>Fig. 5B</b> ) .....                             | SI Figure 38 |
| Statistical analysis of differences in paw thicknesses (from <b>Fig. 5B</b> ) ..... | SI Figure 39 |
| Images of mouse paws (from <b>Fig. 5B</b> ) .....                                   | SI Figure 40 |
| Body weight measurements (from <b>Fig. 5B</b> ) .....                               | SI Figure 41 |
| Statistical analysis of differences in body weight (from <b>Fig. 5B</b> ) .....     | SI Figure 42 |

## Adjuvant-induced arthritis therapeutic model – dose finding study

|                                                                                                                  |                 |
|------------------------------------------------------------------------------------------------------------------|-----------------|
| Images of mouse paws (from <b>Fig. 6</b> ) .....                                                                 | SI Figure 43    |
| Paw thickness measurements (from <b>Fig. 6A</b> ) .....                                                          | SI Figure 44    |
| Statistical analysis of differences in paw thickness (from <b>Fig. 6A</b> ) .....                                | SI Figure 45    |
| Arthritis score measurements (from <b>Fig. 6B</b> ) .....                                                        | SI Figure 46    |
| Statistical analysis of differences in arthritis score (from <b>Fig. 6B</b> ) .....                              | SI Figure 47    |
| Statistical analysis of differences in morphometric bone parameters (from <b>Fig. 6D-6H</b> ) .....              | SI Figure 48    |
| Measurements and statistical analysis of EC20 update (from <b>Fig. 6I</b> ) .....                                | SI Figure 49    |
| Images of H&E staining of joints (from <b>Fig. 6J</b> ) .....                                                    | SI Figure 50-53 |
| Immunofluorescence staining images of different immune cell populations from joints (from <b>Fig. 6K</b> ) ..... | SI Figure 54-59 |
| Percent reduction of immune cell subpopulations (from <b>Fig. 6L</b> ) .....                                     | SI Figure 60    |
| Statistical analysis of differences in immune cell types (from <b>Fig. 6L</b> ) .....                            | SI Figure 61    |
| Body weight graph (from <b>Fig. 6</b> ) .....                                                                    | SI Figure 62    |
| Body weight measurements (from <b>Fig. 6</b> ) .....                                                             | SI Figure 63    |
| Statistical analysis of differences in body weight (from <b>Fig. 6</b> ) .....                                   | SI Figure 64    |
| Complete blood count values (from <b>Fig. 6</b> ) .....                                                          | SI Figure 65    |
| Statistical analysis of complete blood count (from <b>Fig. 6</b> ) .....                                         | SI Figure 66    |

# **Human Inflammatory Disease IHC Staining**

Crohn's Disease

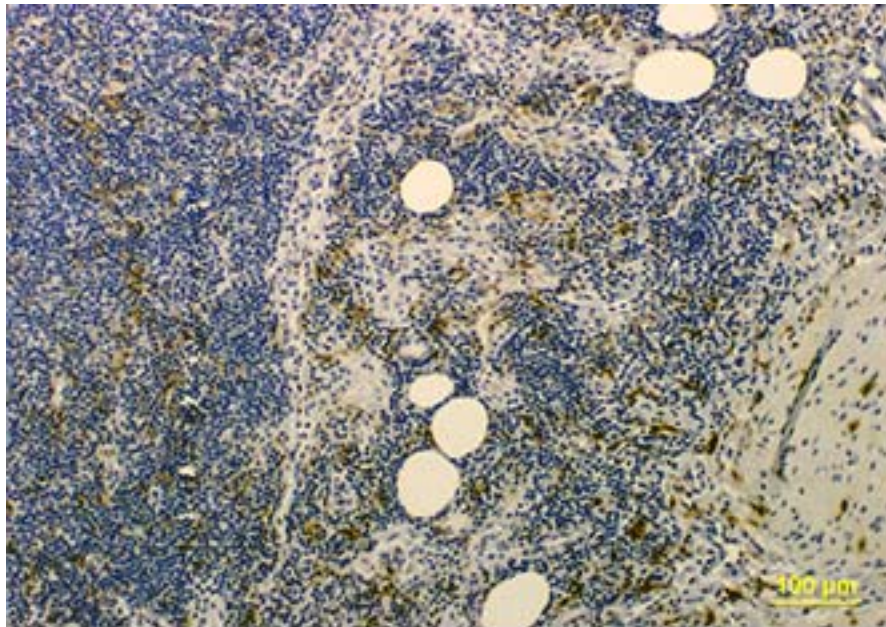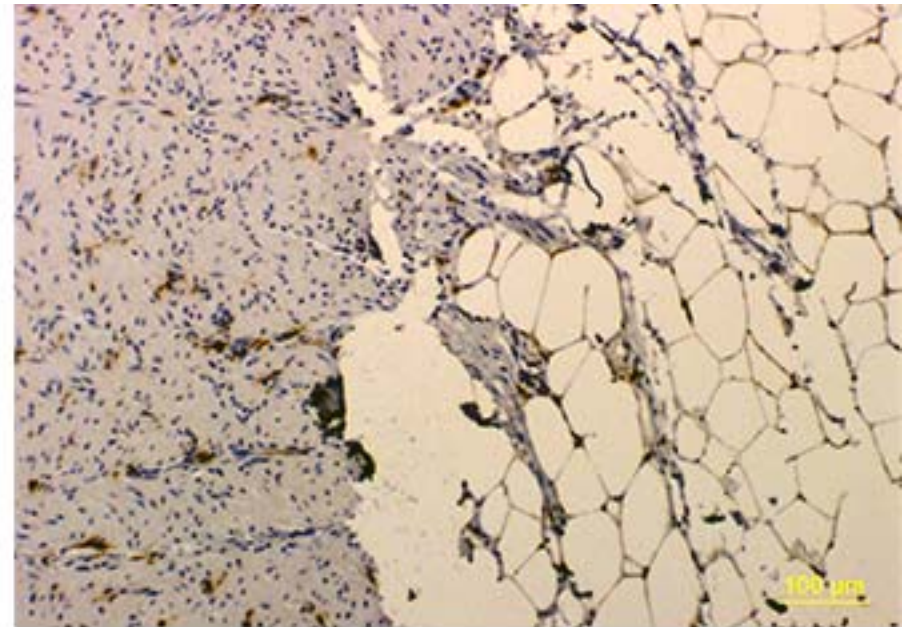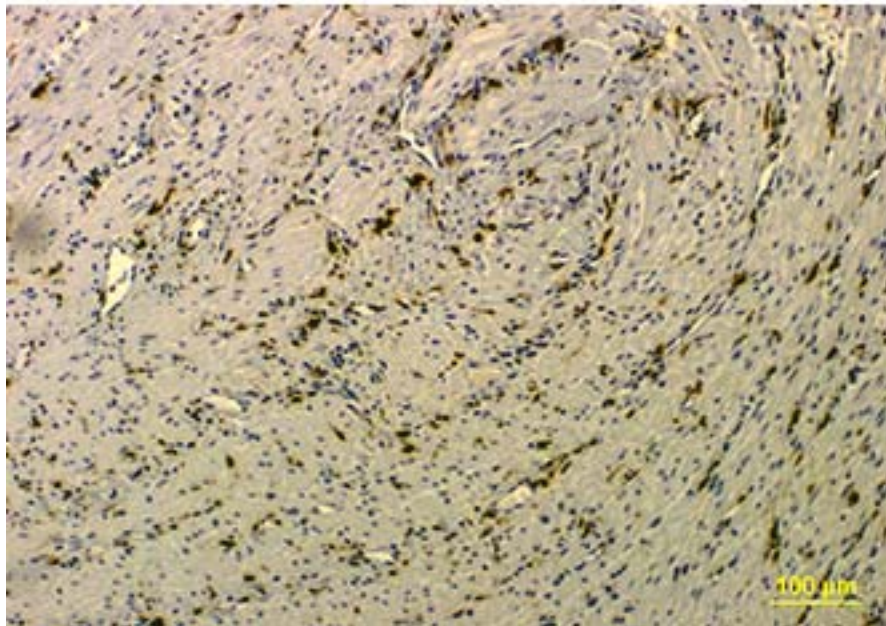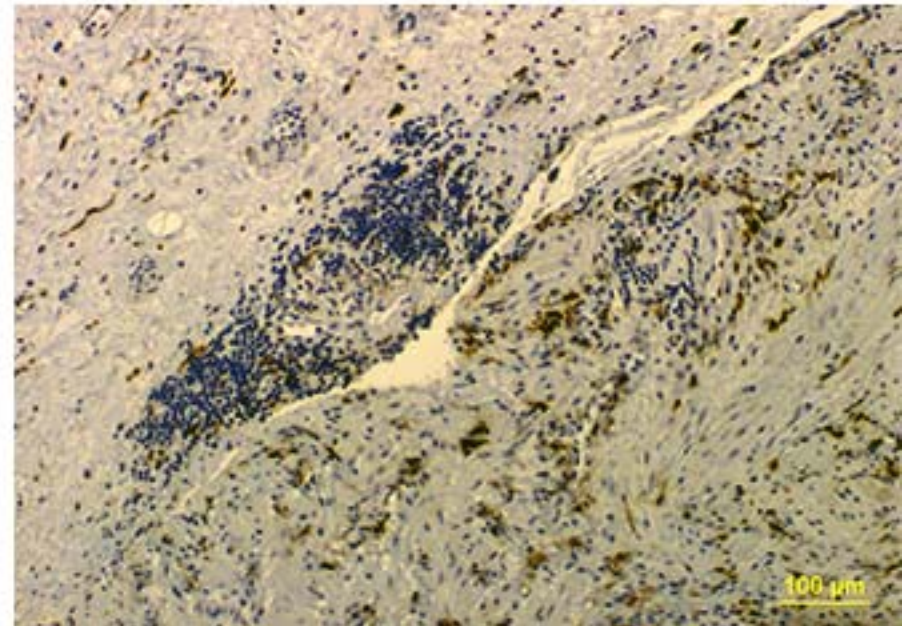

SI Figure 1. Immunohistochemistry staining of thin sections of colon from patients with Crohn's Disease. The indicated tissue sections were stained with m909, a human monoclonal antibody to human FR- $\beta$ , that exhibits no cross-reactivity to other folate receptor isoforms.

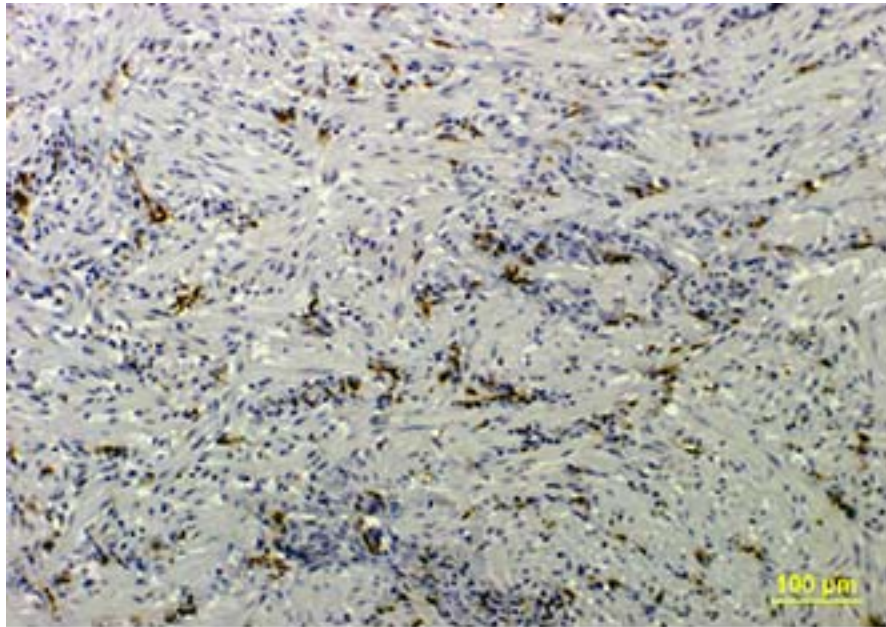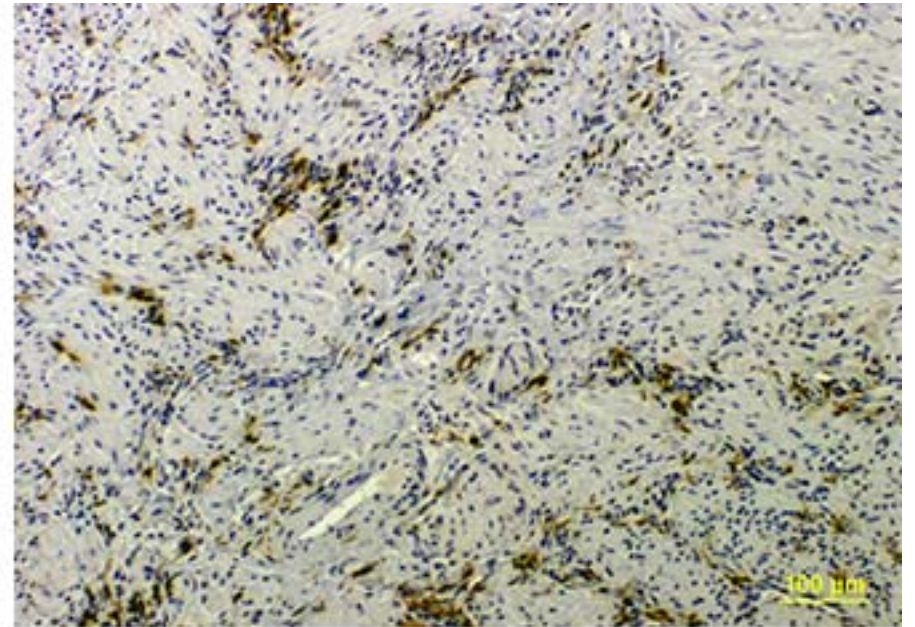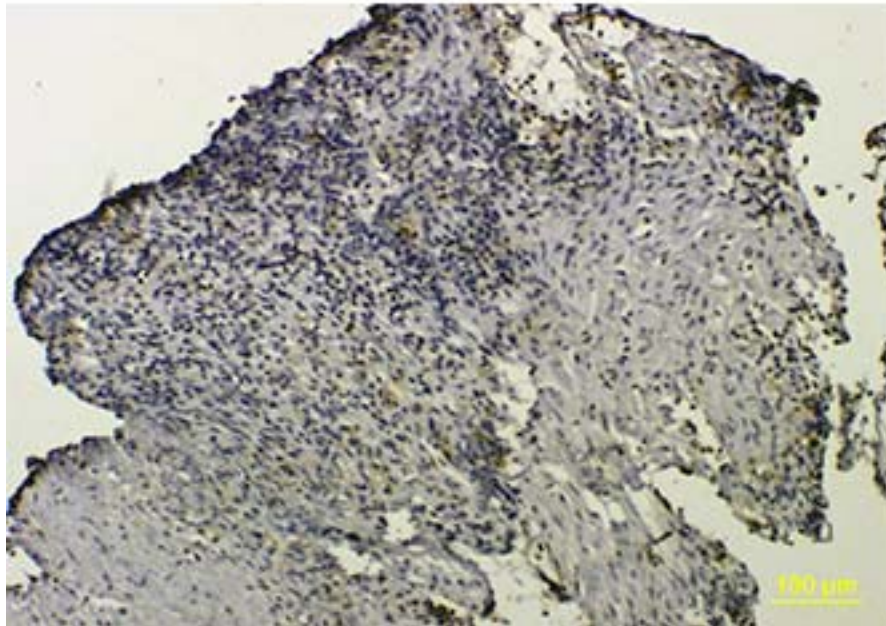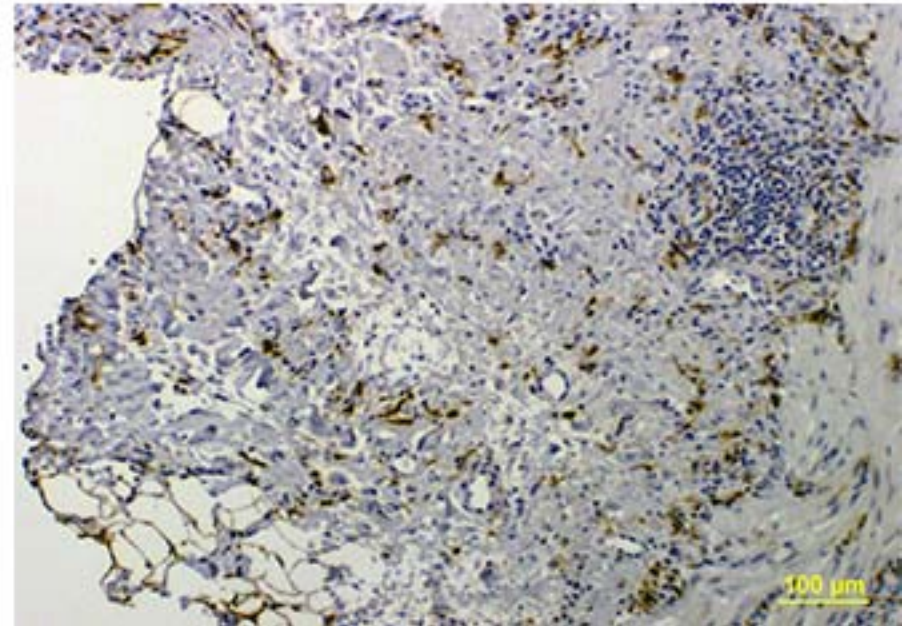

SI Figure 2. Immunohistochemistry staining of thin sections of colon from patients with Crohn's Disease. The indicated tissue sections were stained with m909, a human monoclonal antibody to human FR- $\beta$ , that exhibits no cross-reactivity to other folate receptor isoforms.

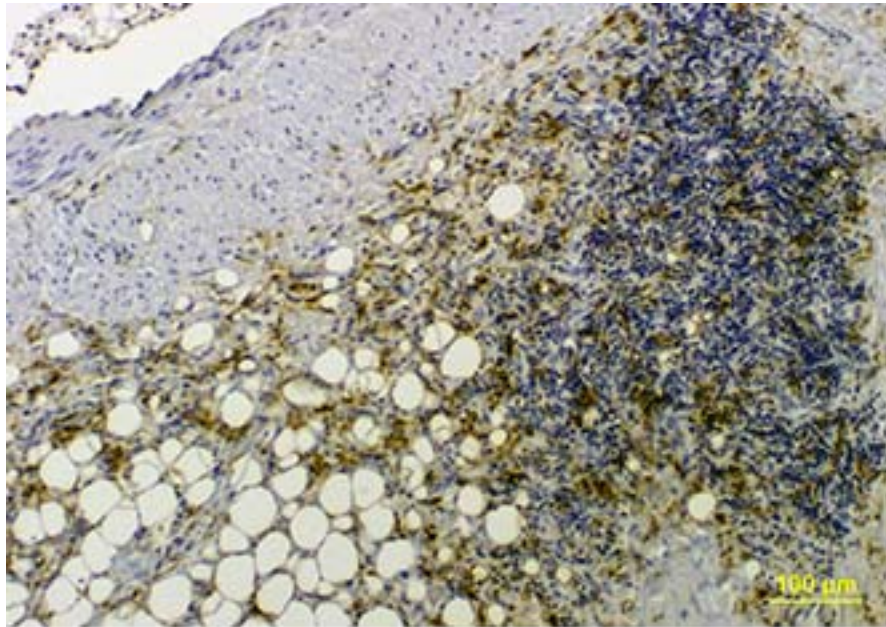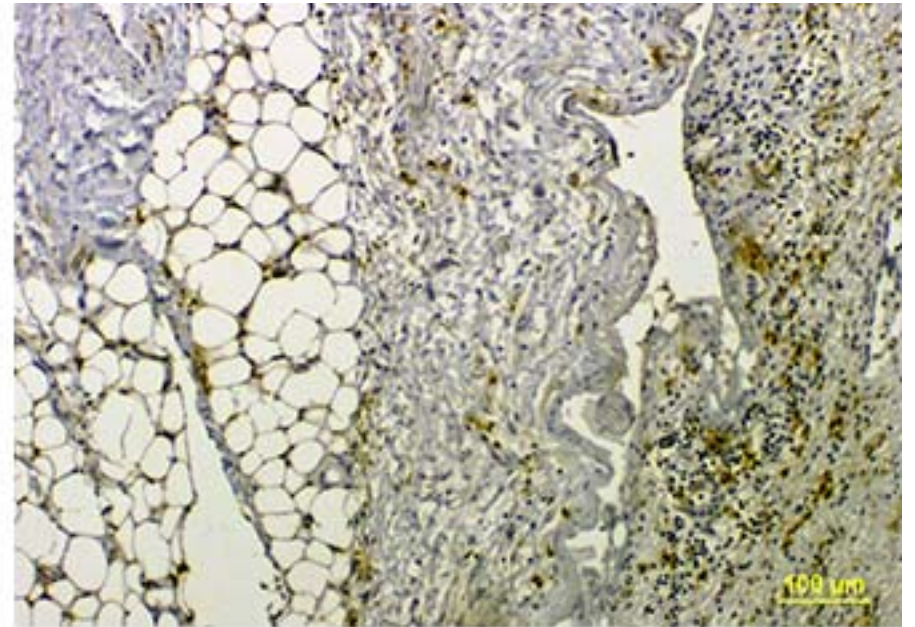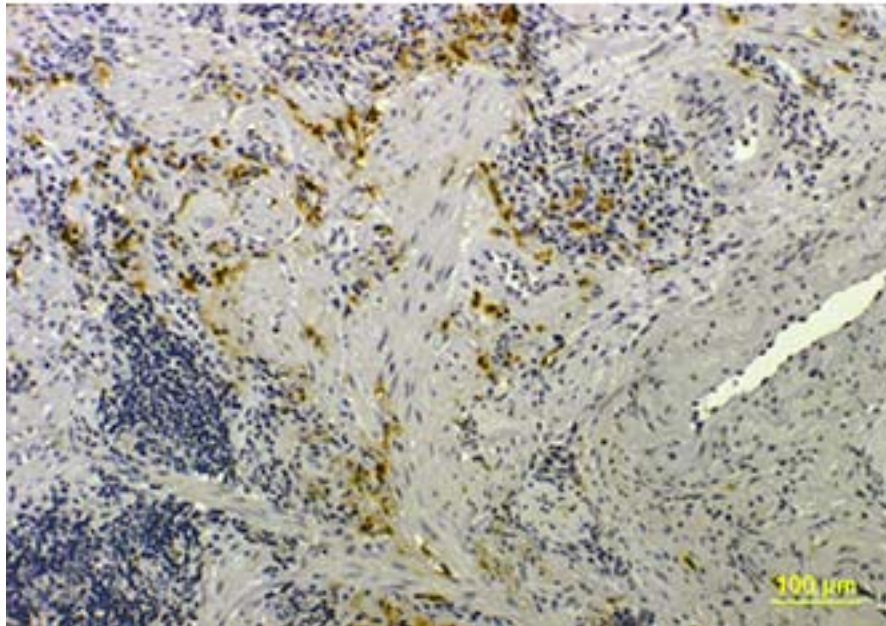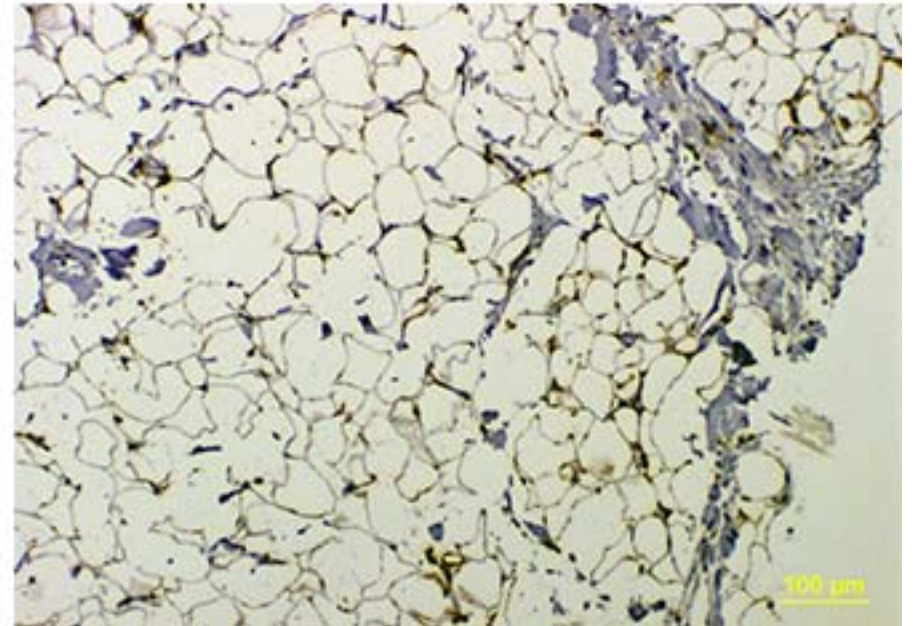

SI Figure 3. Immunohistochemistry staining of thin sections of colon from patients with Crohn's Disease. The indicated tissue sections were stained with m909, a human monoclonal antibody to human FR- $\beta$ , that exhibits no cross-reactivity to other folate receptor isoforms.

# **Human Inflammatory Disease IHC Staining**

## **Ulcerative Colitis**



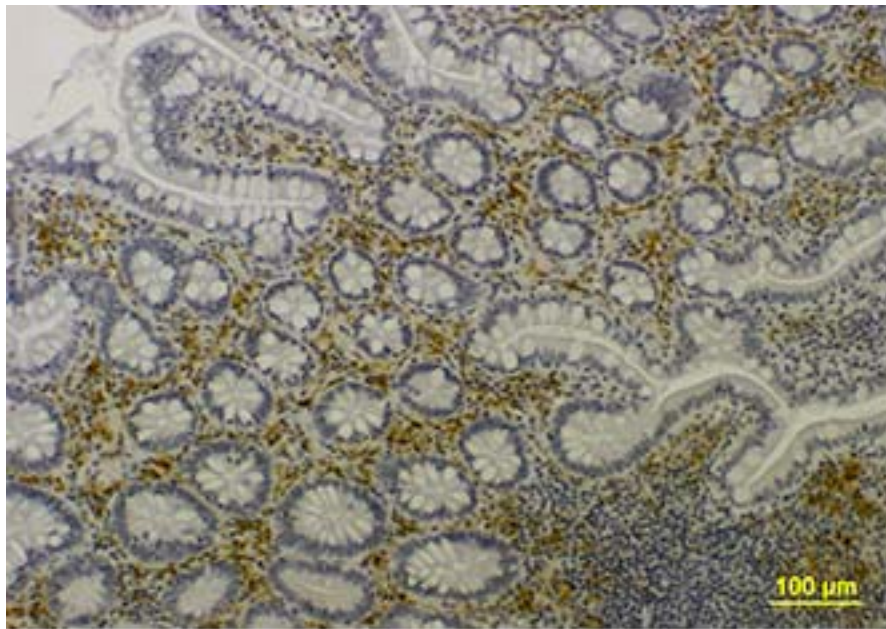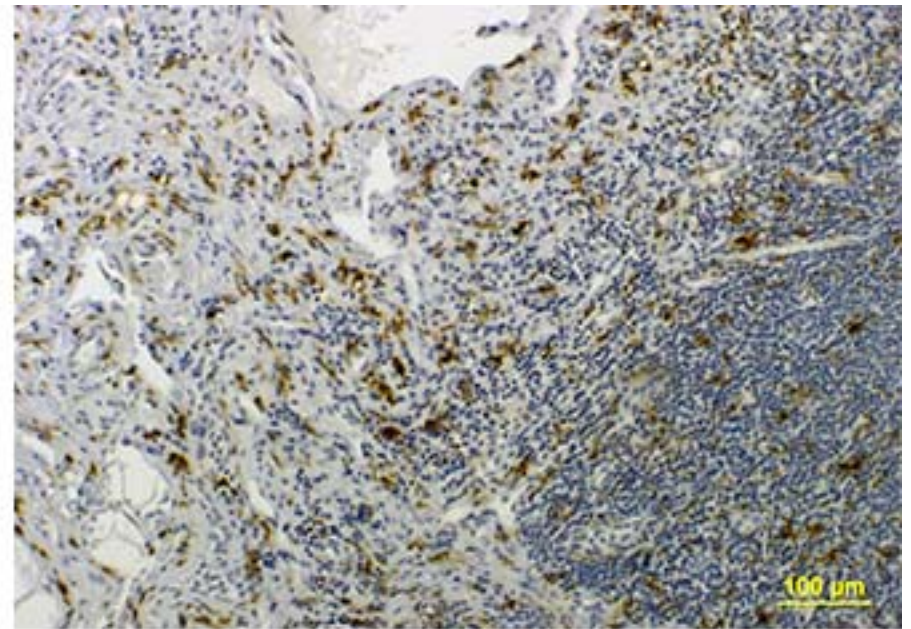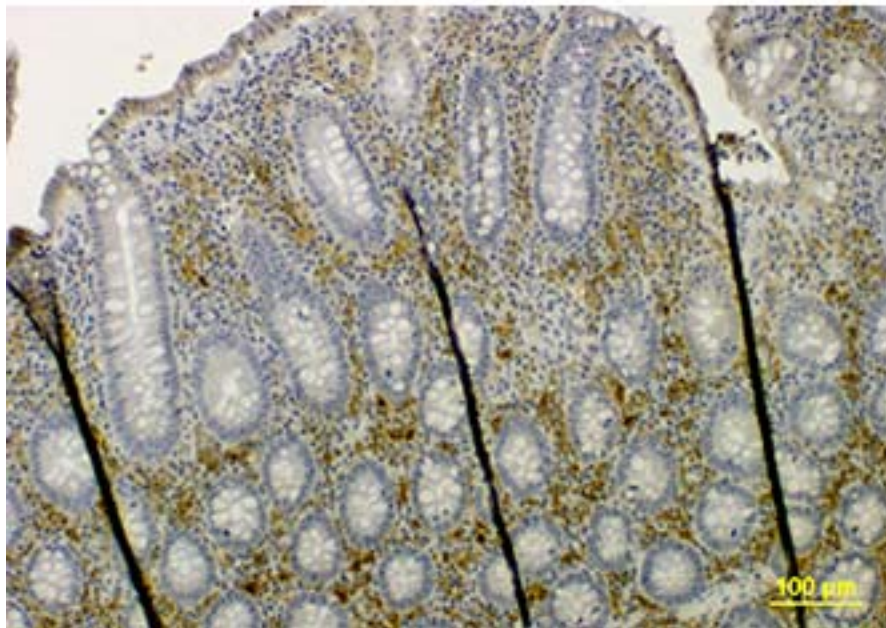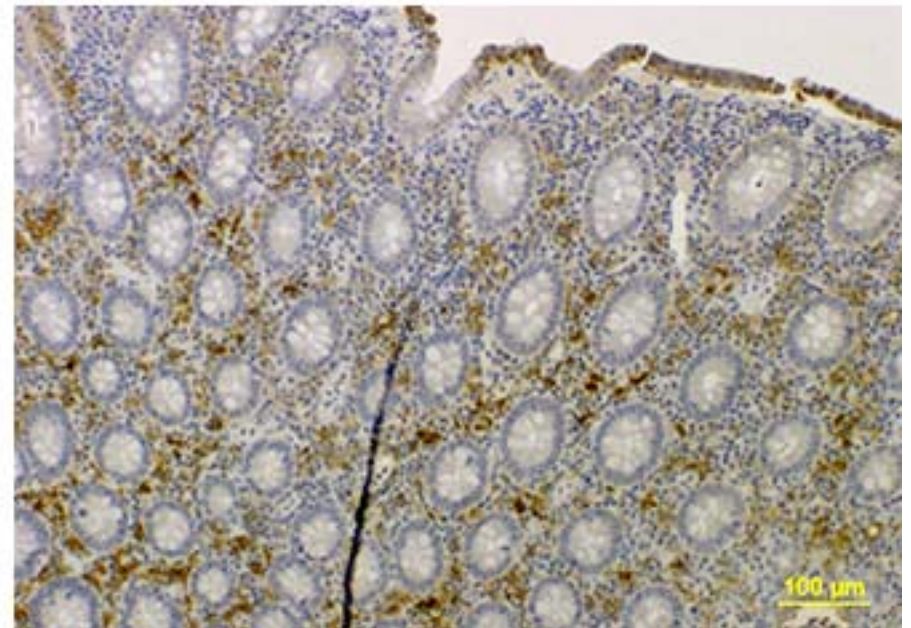

SI Figure 4. Immunohistochemistry staining of thin sections of colon from patients with Ulcerative Colitis. The indicated tissue sections were stained with m909, a human monoclonal antibody to human FR- $\beta$ , that exhibits no cross-reactivity to other folate receptor isoforms.

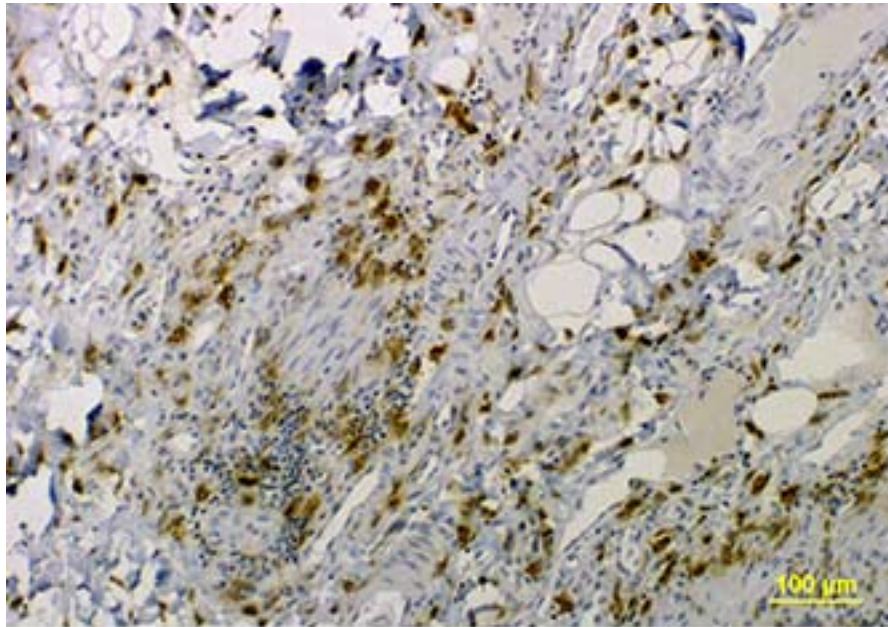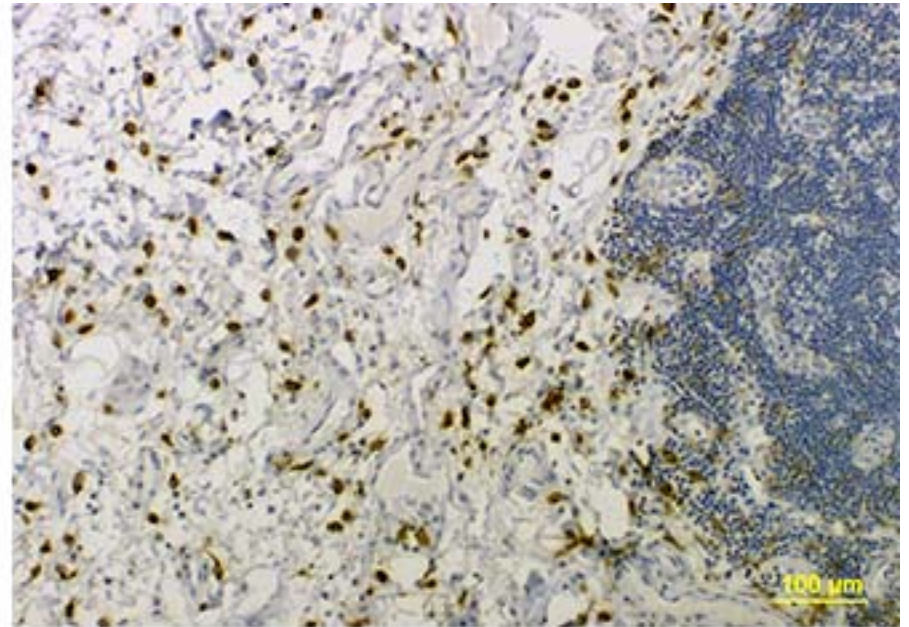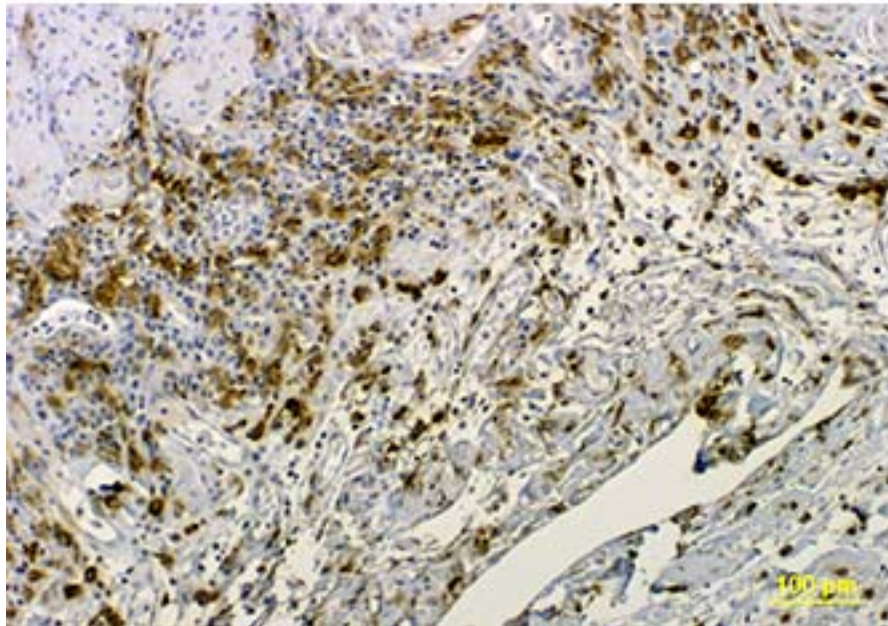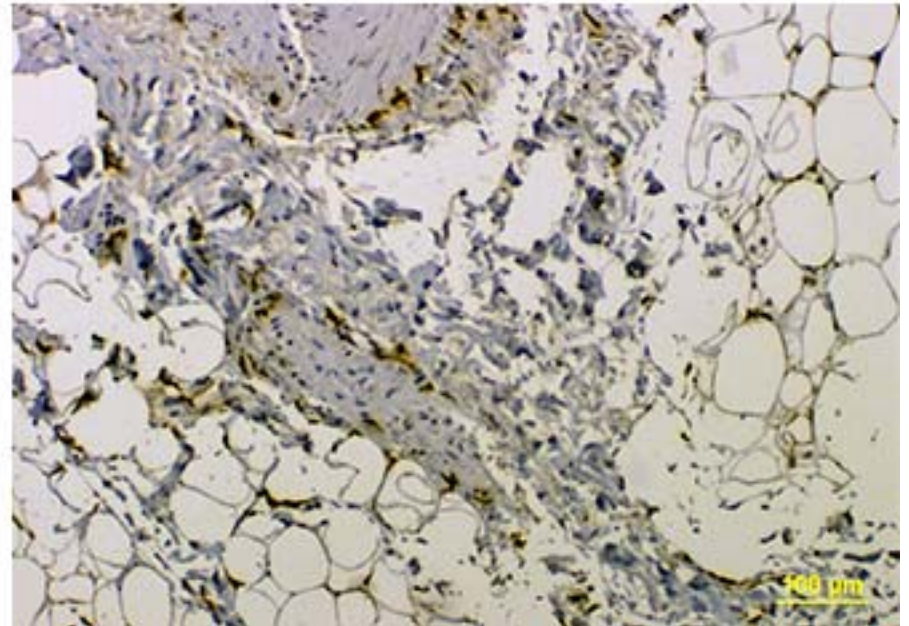

SI Figure 5. Immunohistochemistry staining of thin sections of colon from patients with Ulcerative Colitis. The indicated tissue sections were stained with m909, a human monoclonal antibody to human FR- $\beta$ , that exhibits no cross-reactivity to other folate receptor isoforms.

# **Human Inflammatory Disease IHC Staining**

Normal Lung

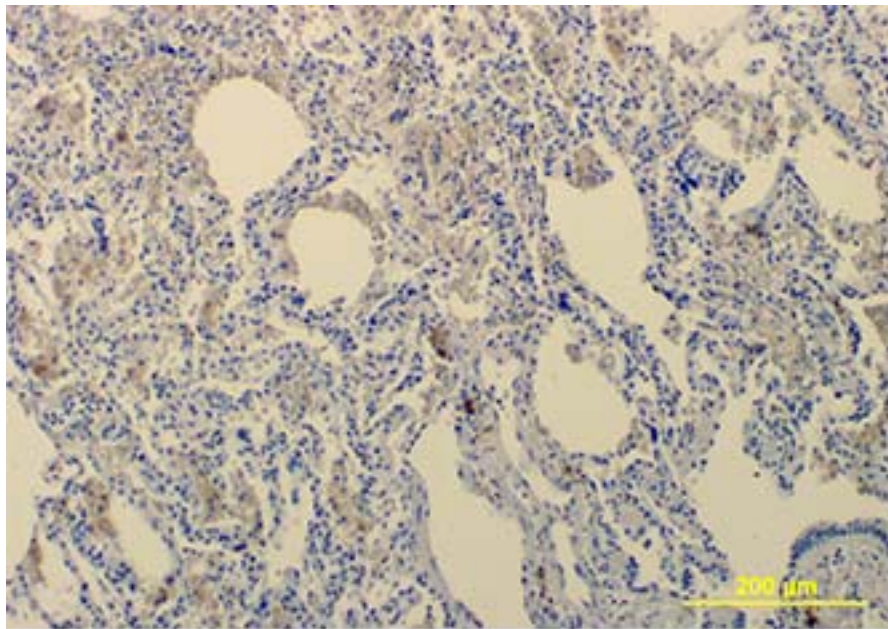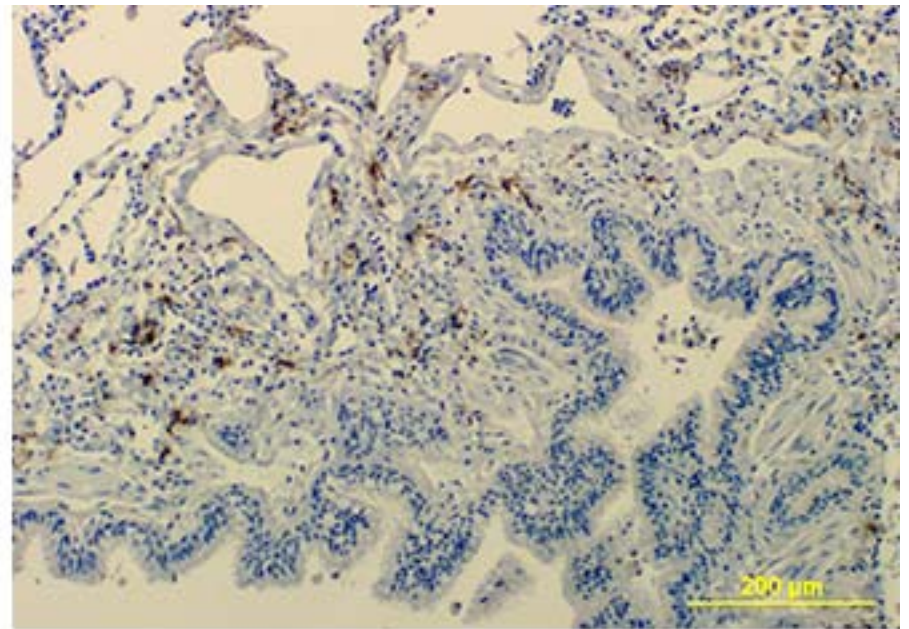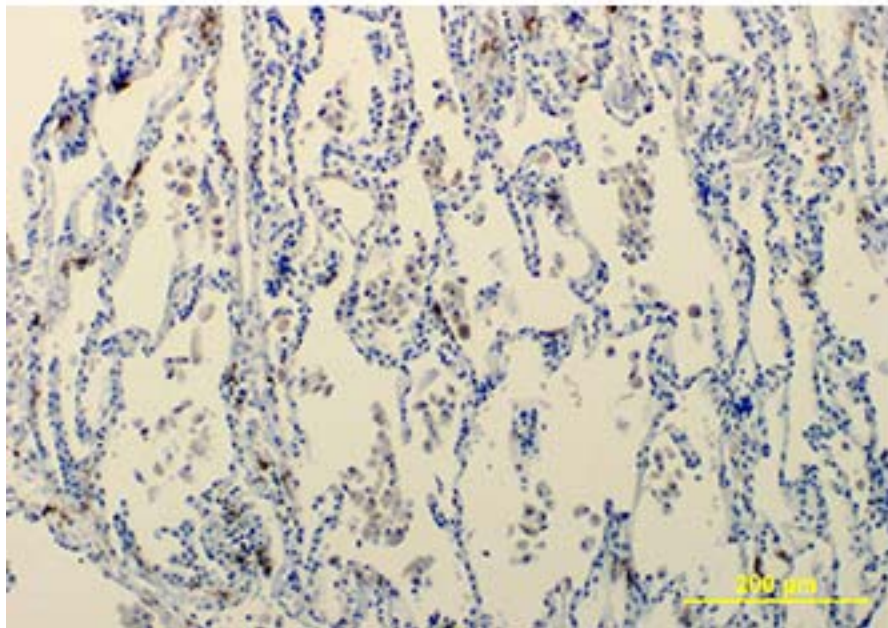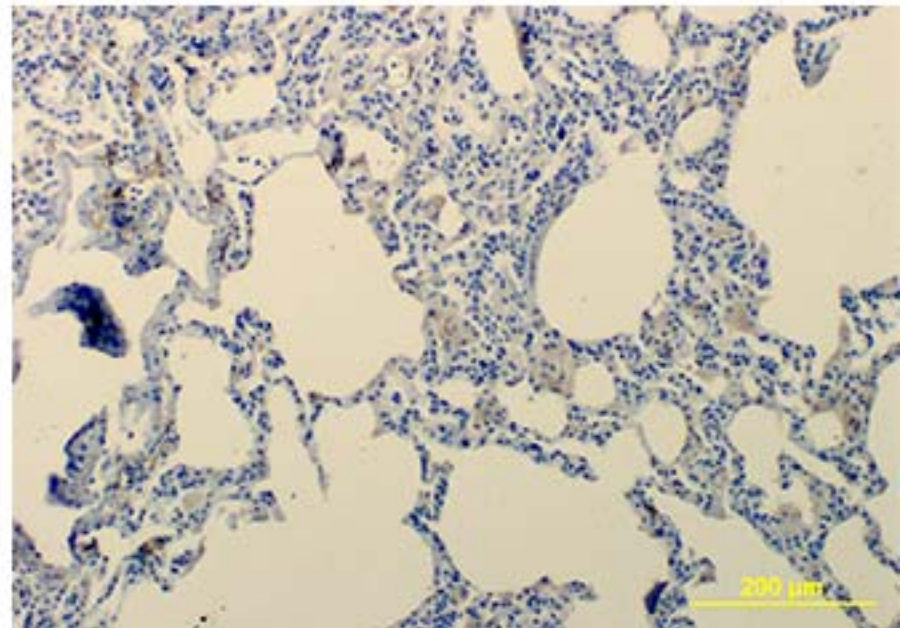

SI Figure 6. Immunohistochemistry staining of thin sections of lung from normal/healthy patients. The indicated tissue sections were stained with m909, a human monoclonal antibody to human FR- $\beta$ , that exhibits no cross-reactivity to other folate receptor isoforms.

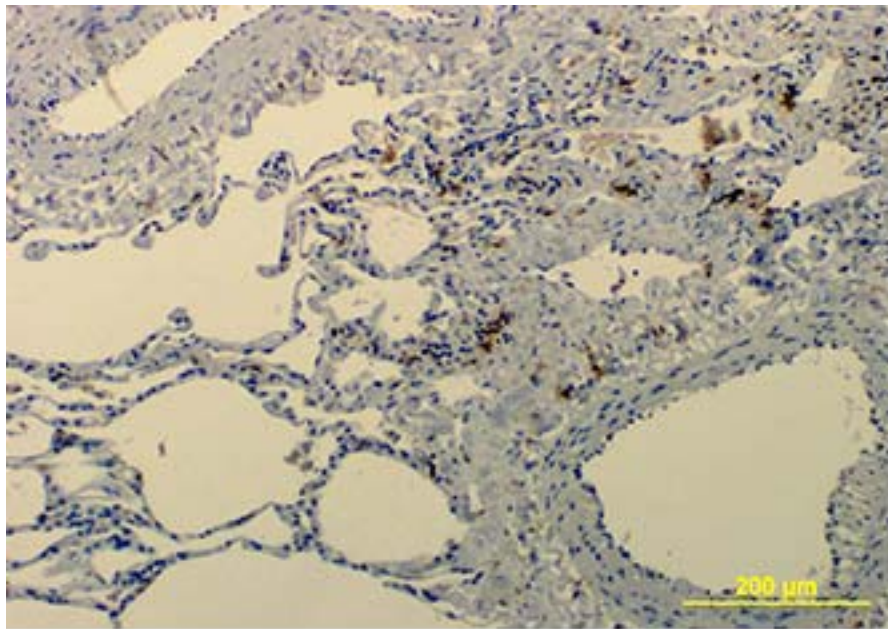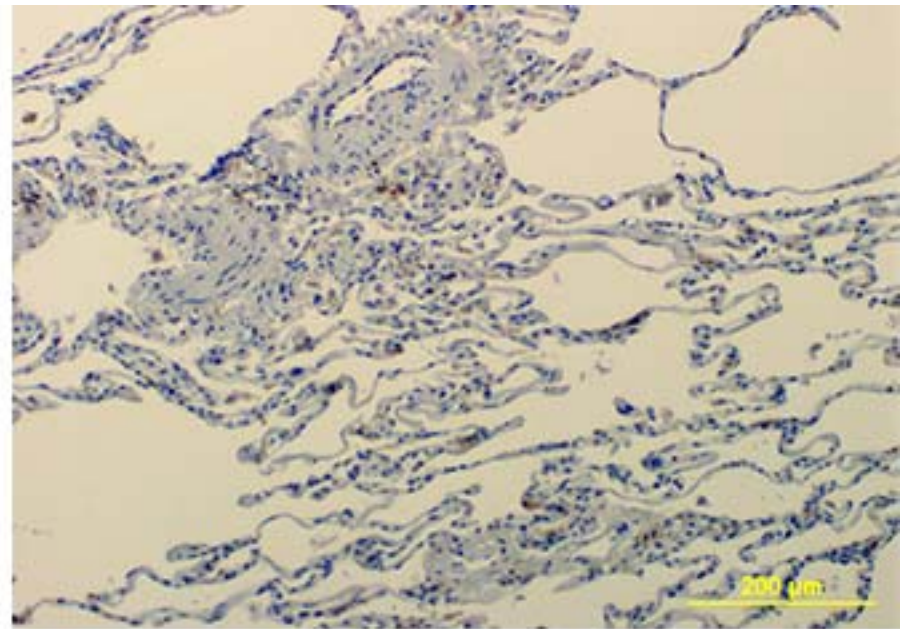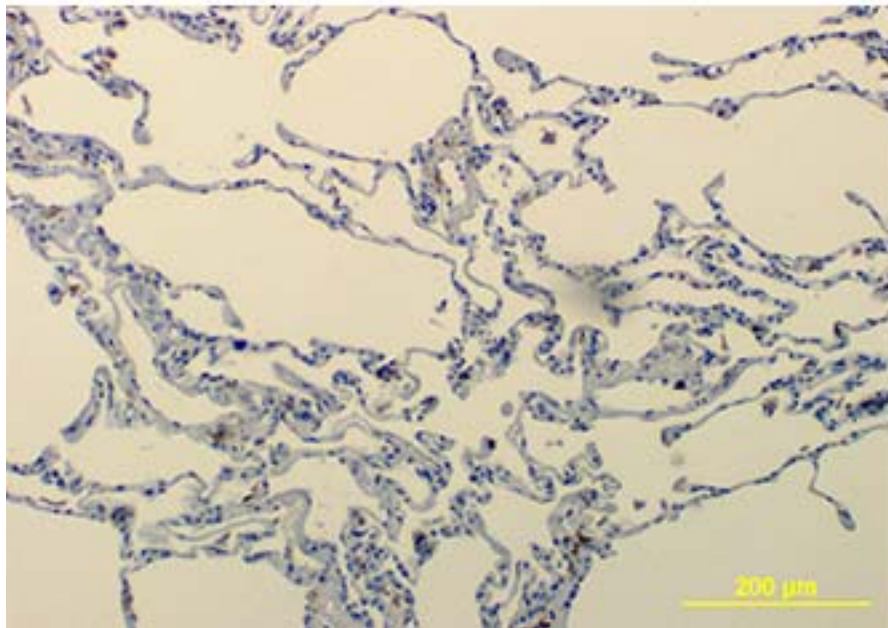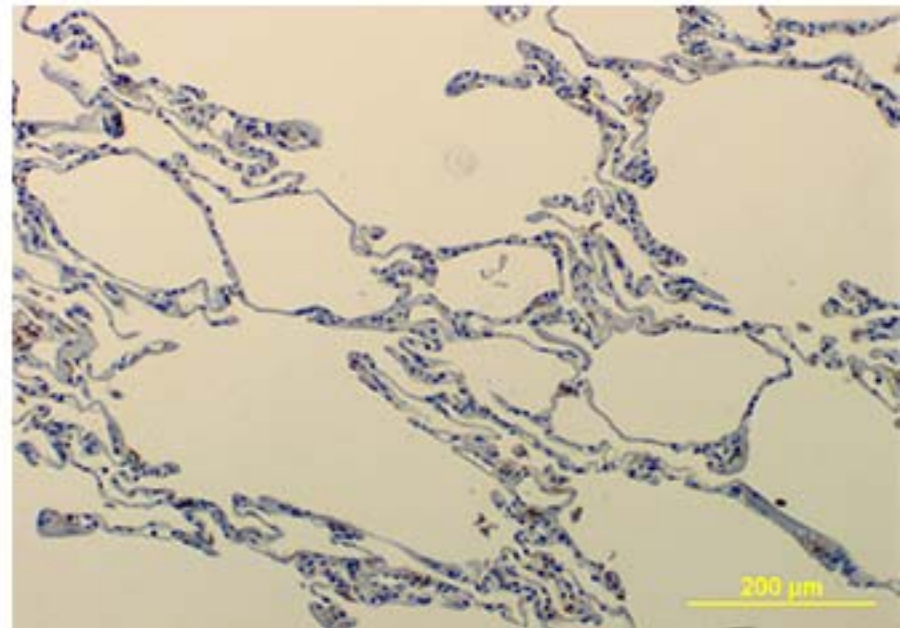

SI Figure 7. Immunohistochemistry staining of thin sections of lung from normal/healthy patients. The indicated tissue sections were stained with m909, a human monoclonal antibody to human FR- $\beta$ , that exhibits no cross-reactivity to other folate receptor isoforms.

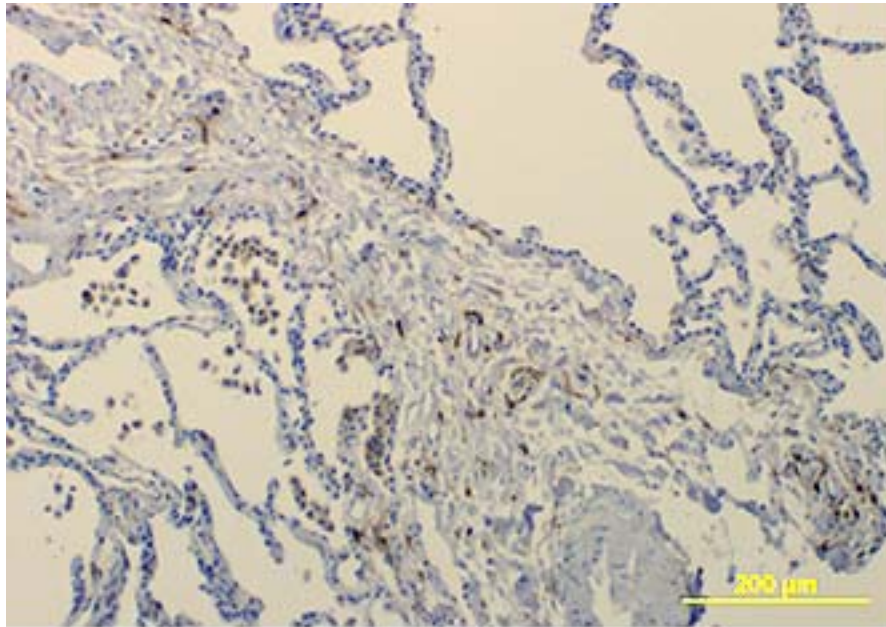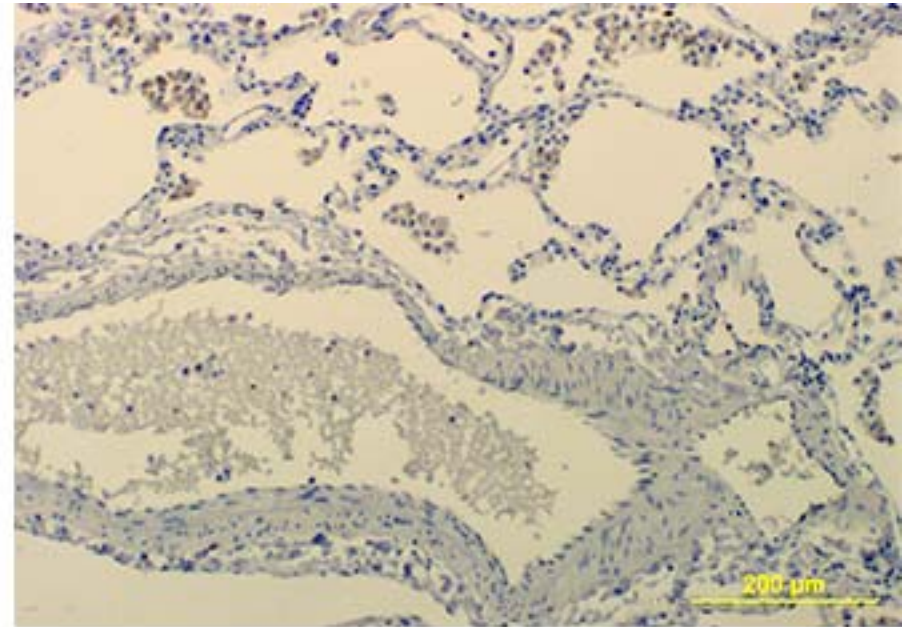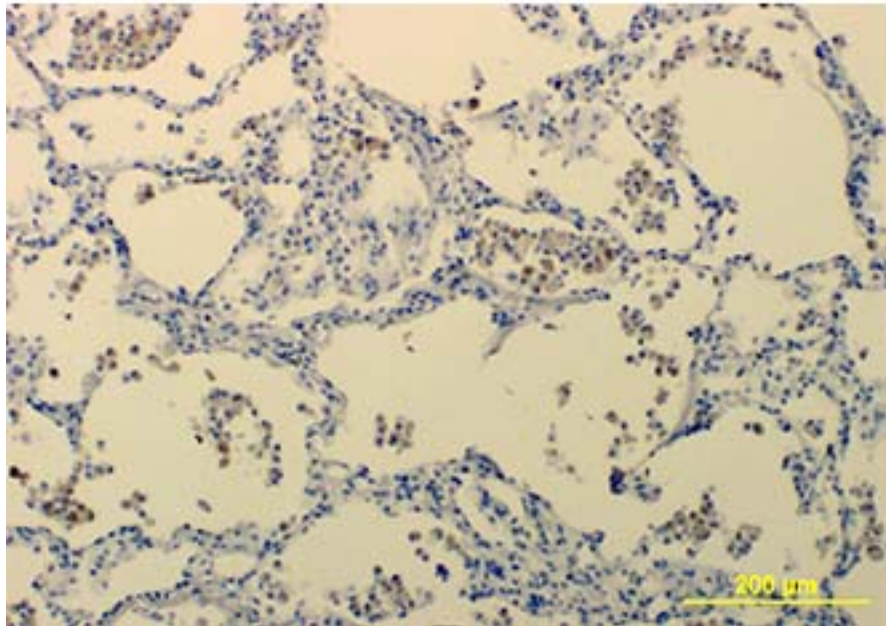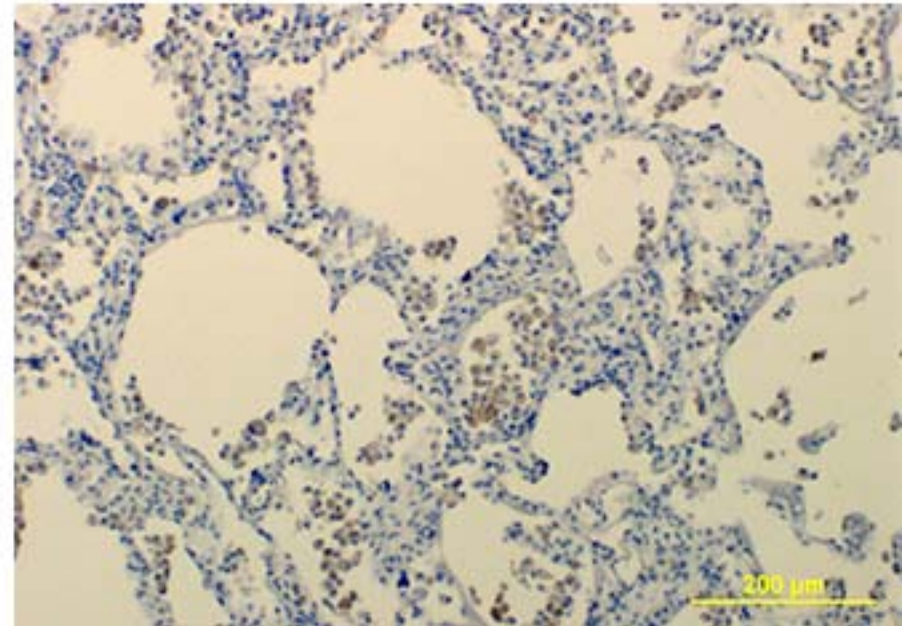

SI Figure 8. Immunohistochemistry staining of thin sections of lung from normal/healthy patients. The indicated tissue sections were stained with m909, a human monoclonal antibody to human FR- $\beta$ , that exhibits no cross-reactivity to other folate receptor isoforms.

# **Human Inflammatory Disease IHC Staining**

Idiopathic Pulmonary Fibrosis  
(IPF)

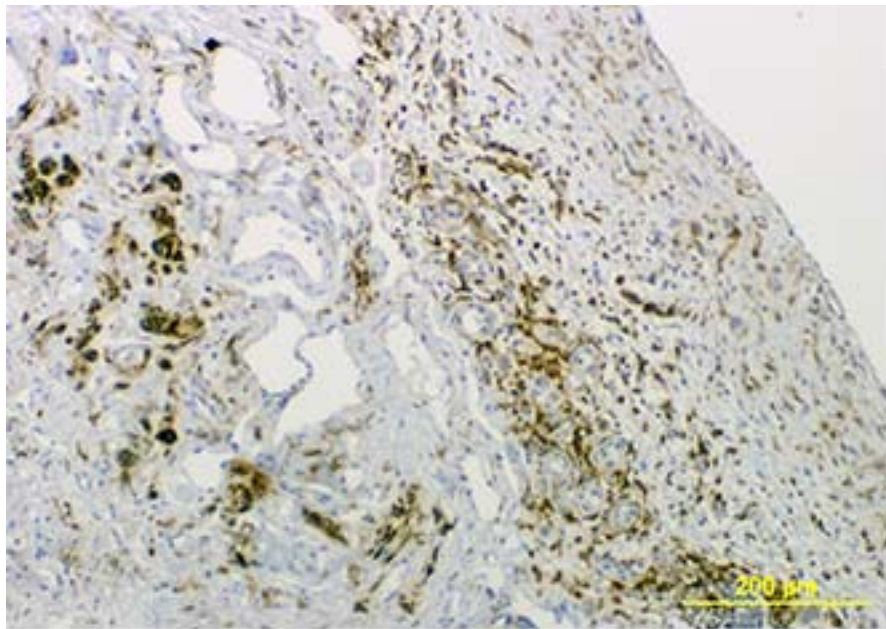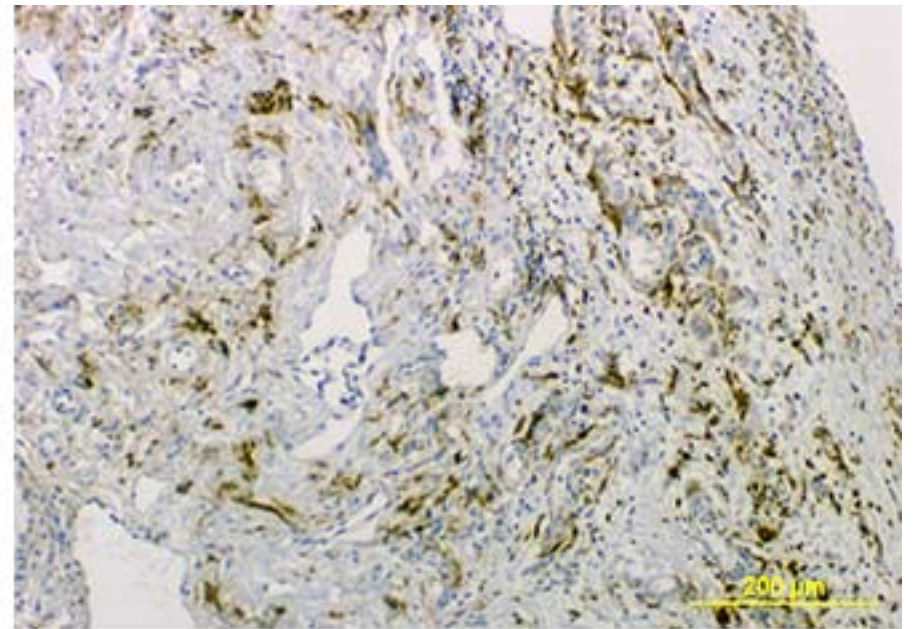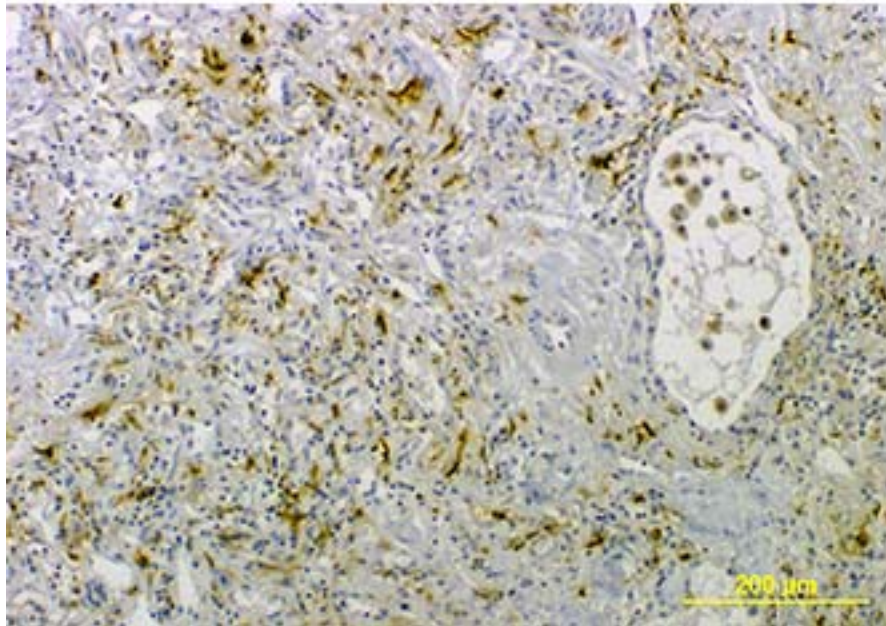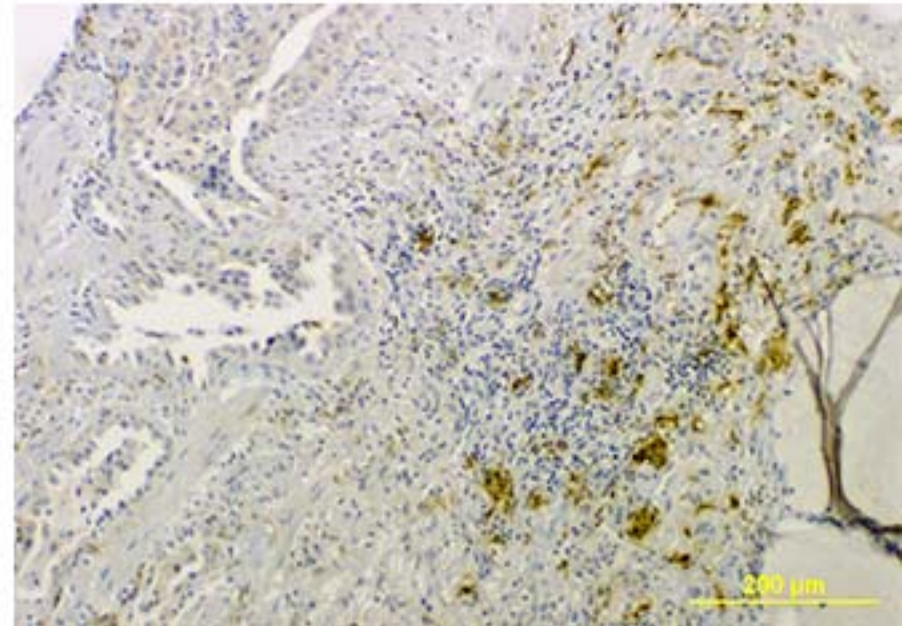

SI Figure 9. Immunohistochemistry staining of thin sections of lung from patients with Idiopathic Pulmonary Fibrosis (IPF). The indicated tissue sections were stained with m909, a human monoclonal antibody to human FR- $\beta$ , that exhibits no cross-reactivity to other folate receptor isoforms.



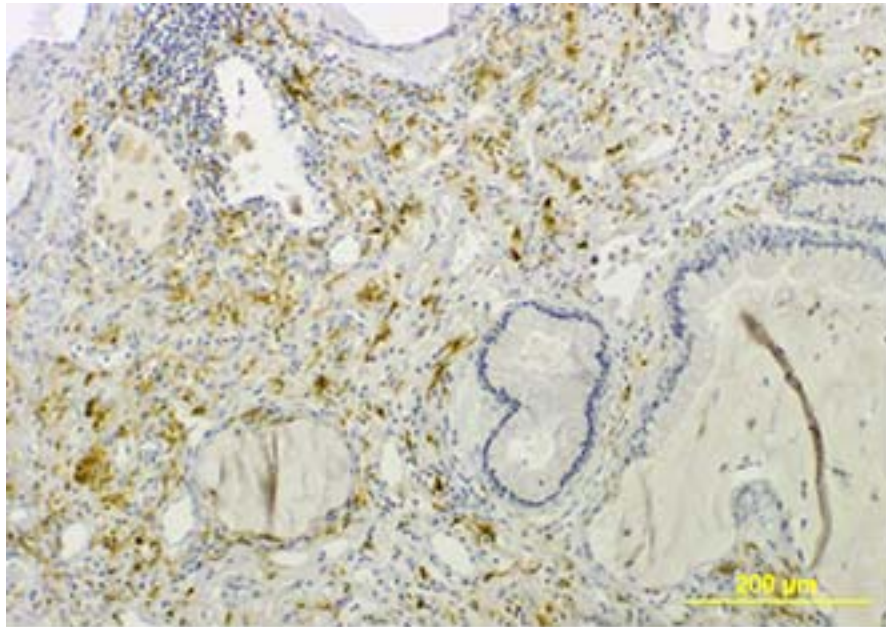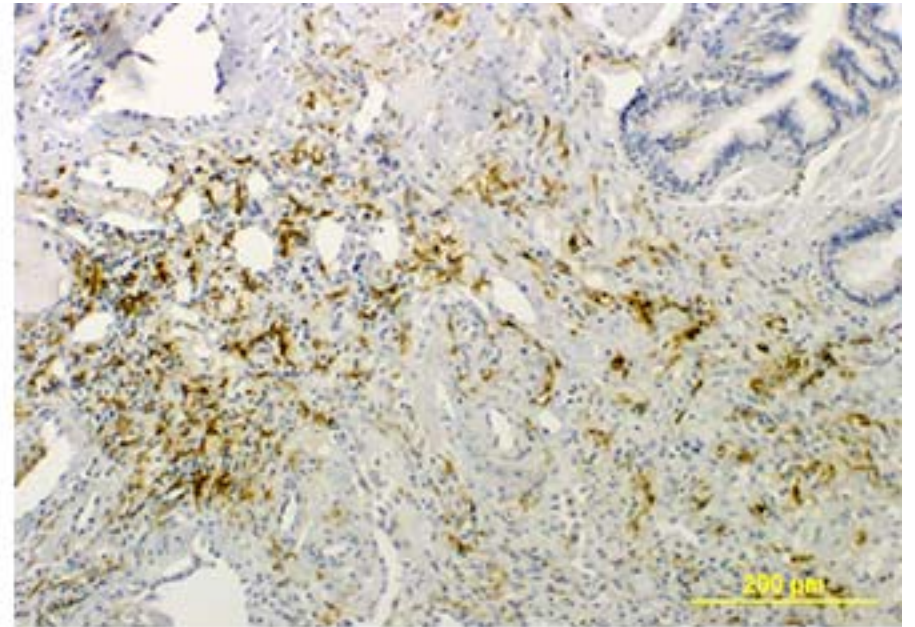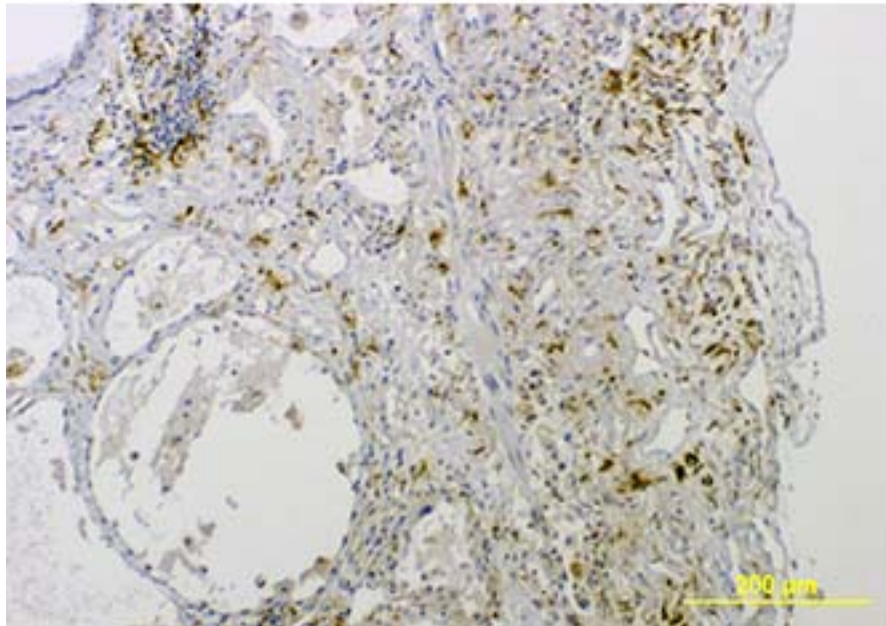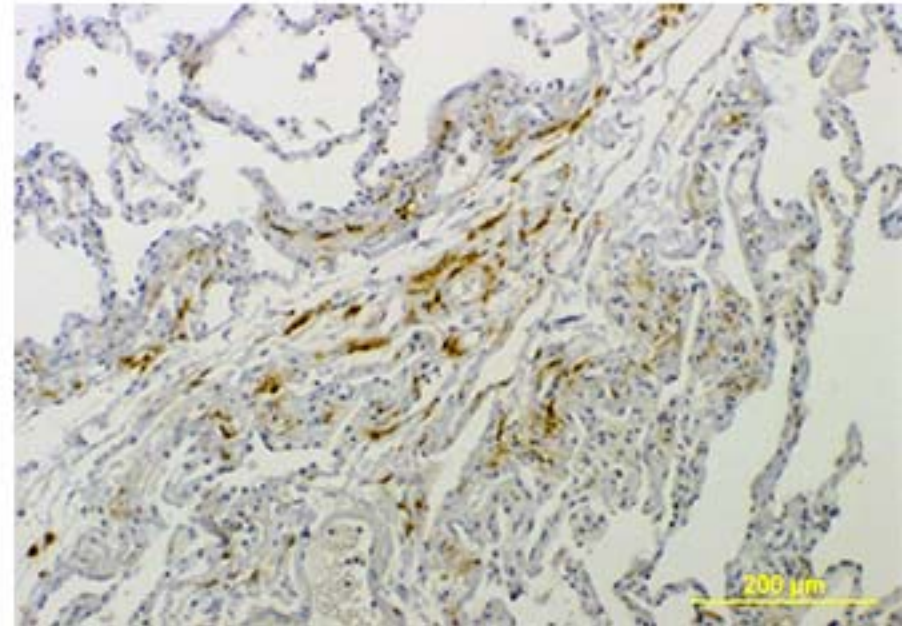

SI Figure 10. Immunohistochemistry staining of thin sections of lung from patients with Idiopathic Pulmonary Fibrosis (IPF). The indicated tissue sections were stained with m909, a human monoclonal antibody to human FR- $\beta$ , that exhibits no cross-reactivity to other folate receptor isoforms.

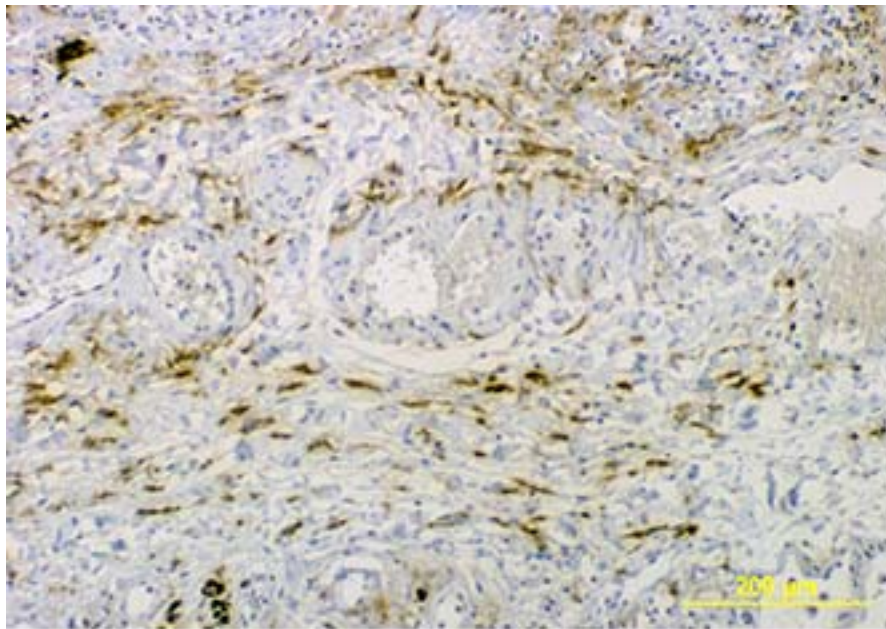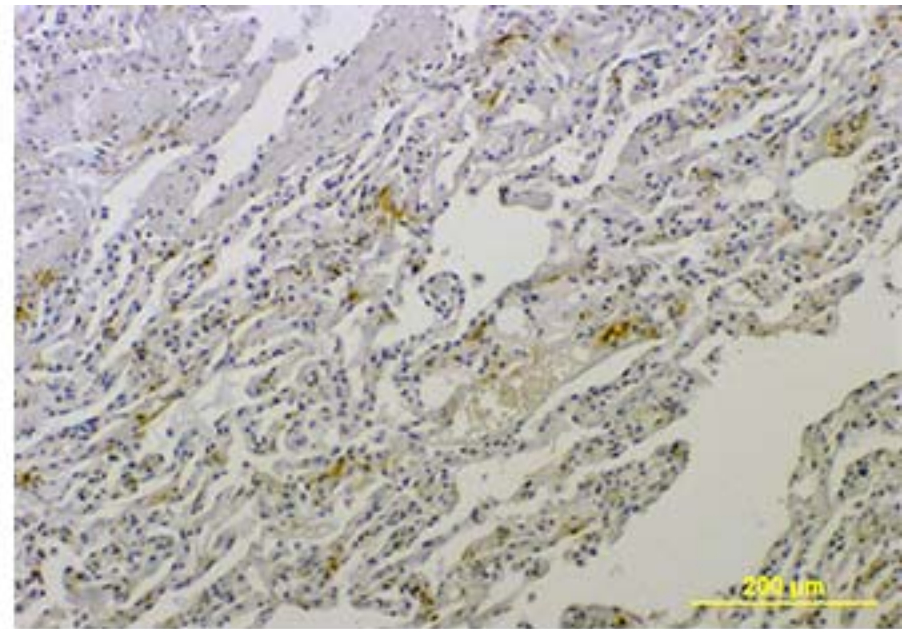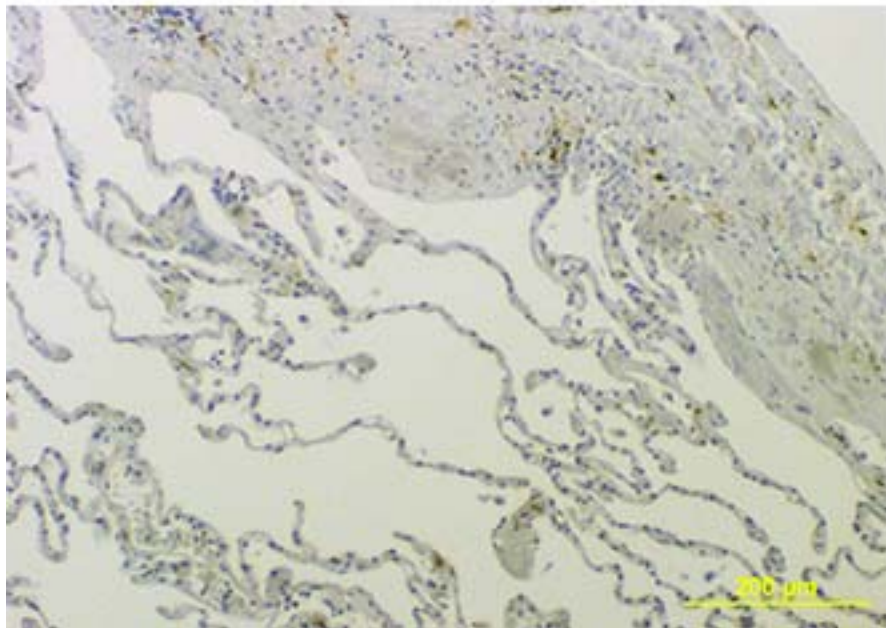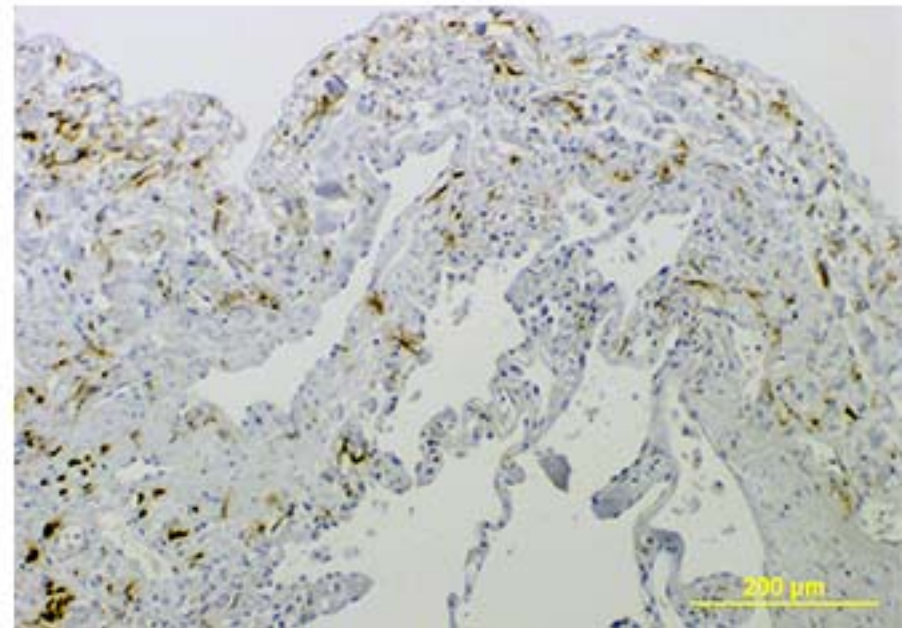

SI Figure 11. Immunohistochemistry staining of thin sections of lung from patients with Idiopathic Pulmonary Fibrosis (IPF). The indicated tissue sections were stained with m909, a human monoclonal antibody to human FR- $\beta$ , that exhibits no cross-reactivity to other folate receptor isoforms.

# **Human Inflammatory Disease IHC Staining**

Nonspecific Interstitial Pneumonia  
(NSIP)

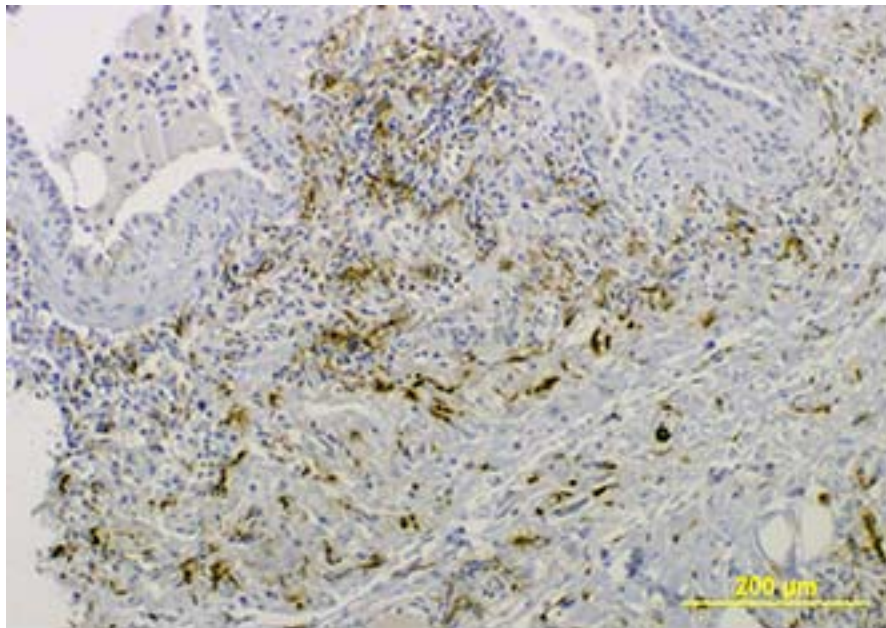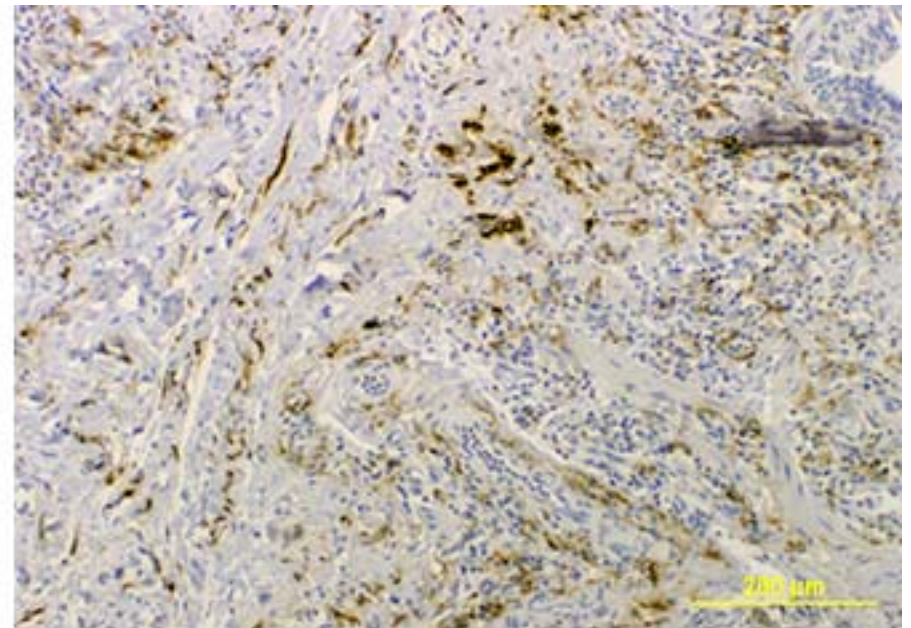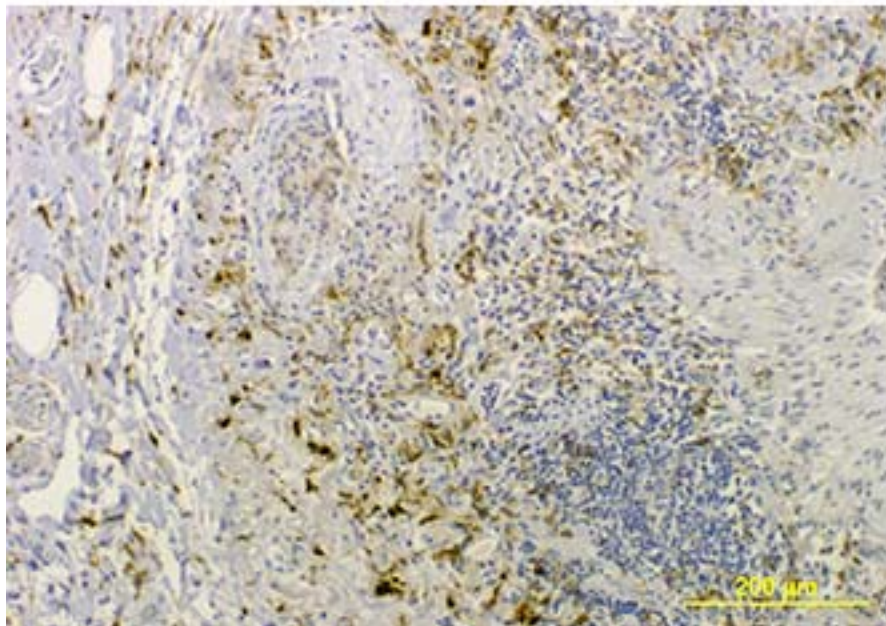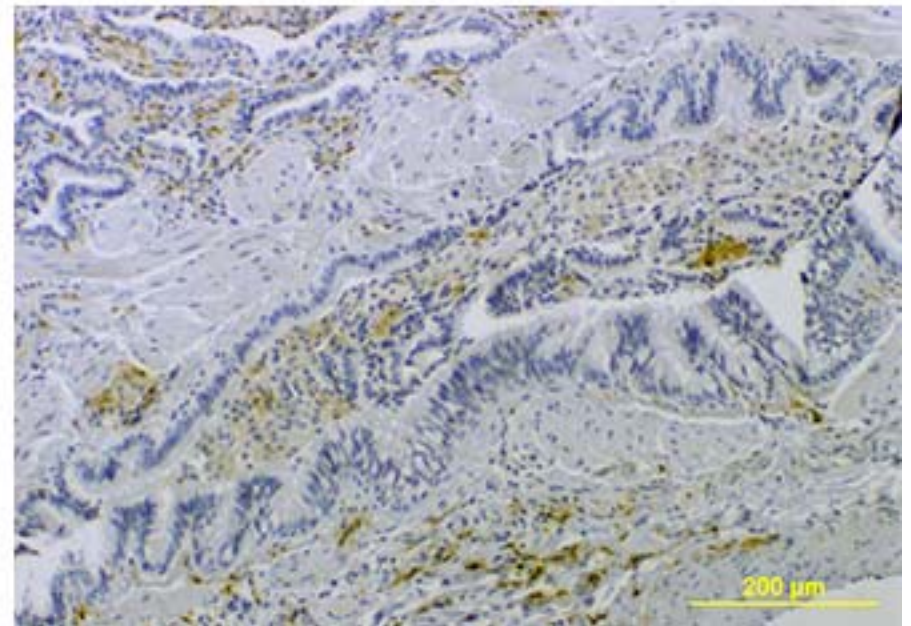

SI Figure 12. Immunohistochemistry staining of thin sections of lung from patients with Nonspecific Interstitial Pneumonia (NSIP). The indicated tissue sections were stained with m909, a human monoclonal antibody to human FR- $\beta$ , that exhibits no cross-reactivity to other folate receptor isoforms.

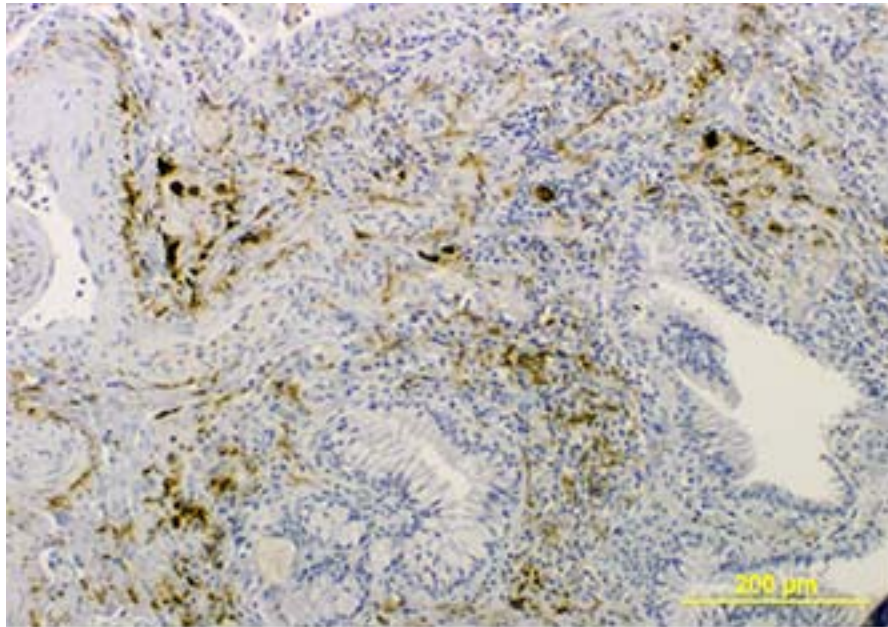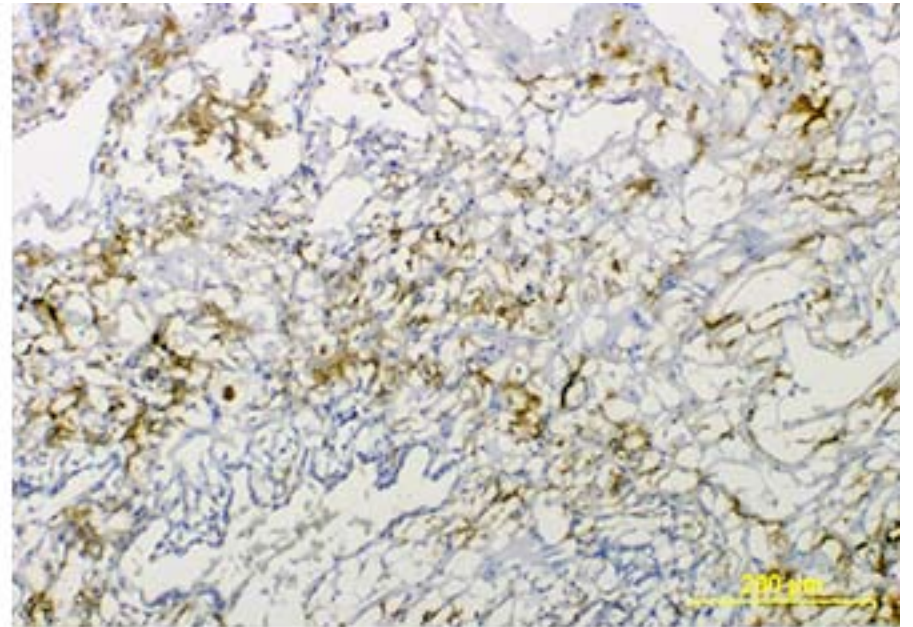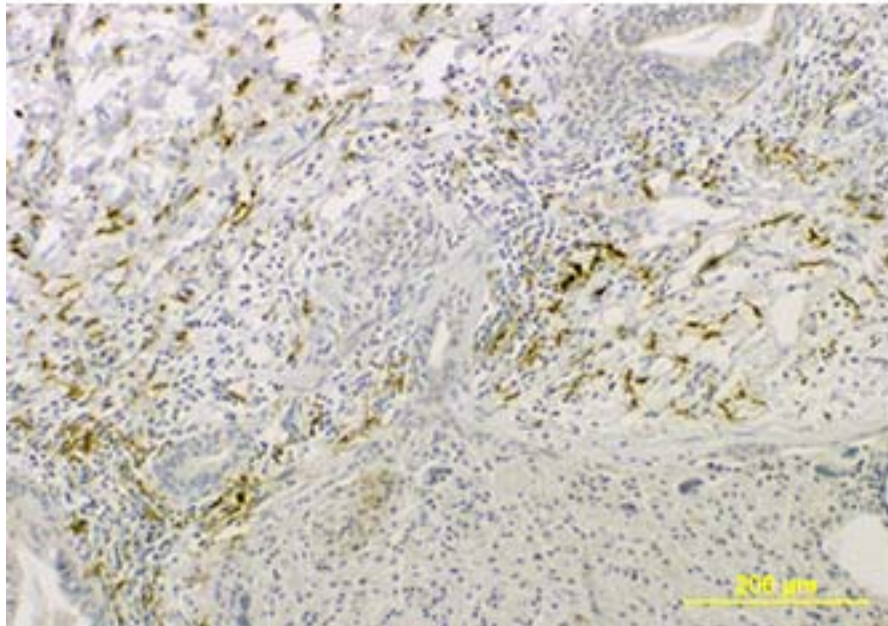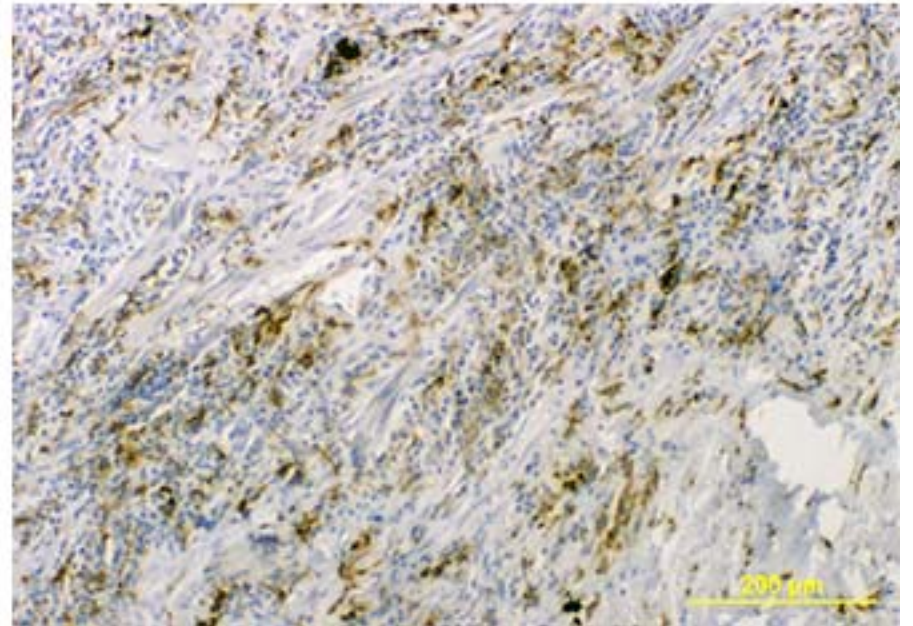

SI Figure 13. Immunohistochemistry staining of thin sections of lung from patients with Nonspecific Interstitial Pneumonia (NSIP). The indicated tissue sections were stained with m909, a human monoclonal antibody to human FR- $\beta$ , that exhibits no cross-reactivity to other folate receptor isoforms.

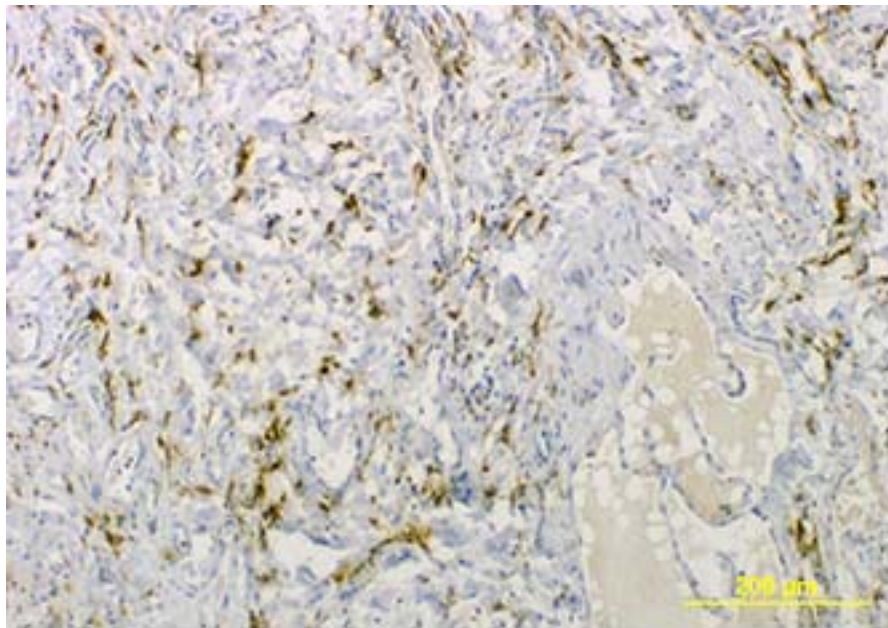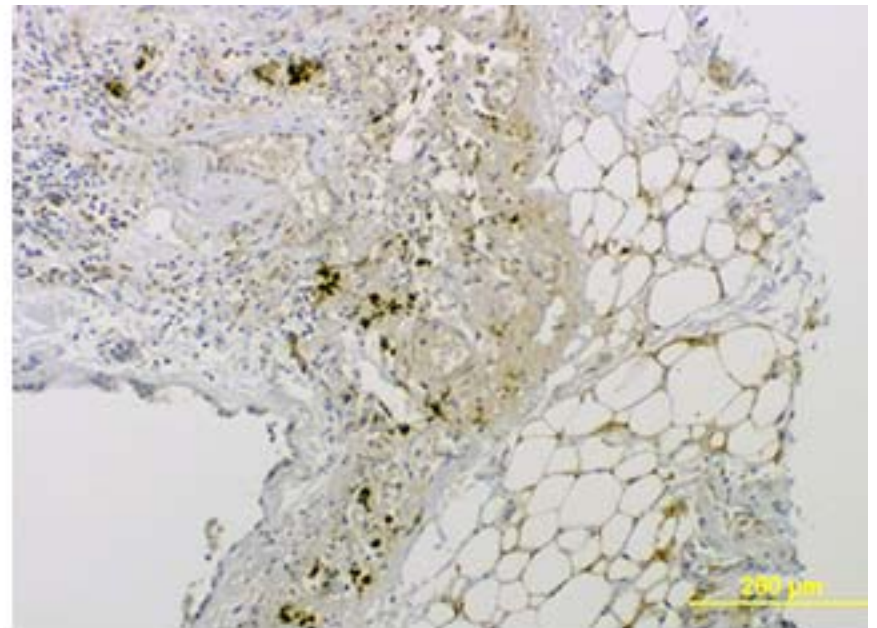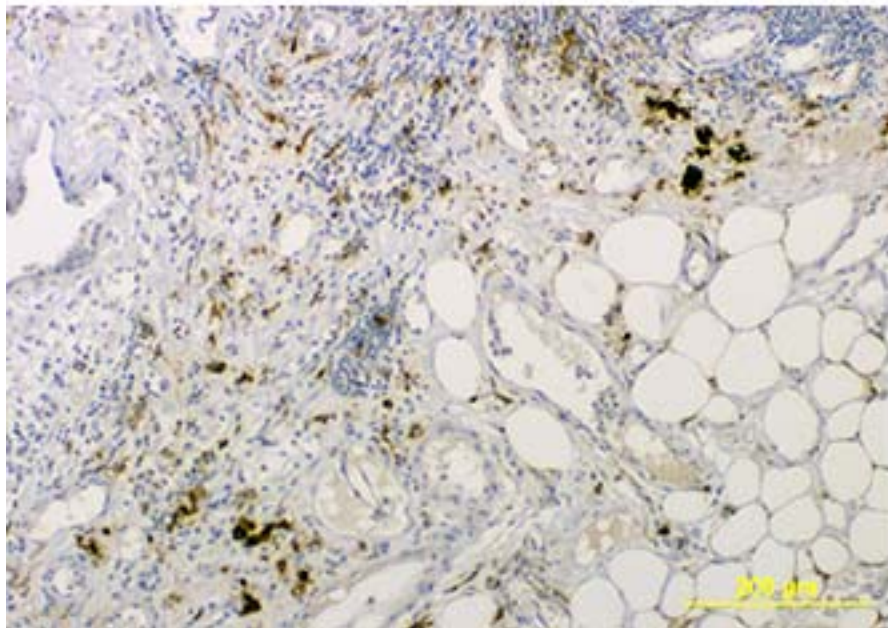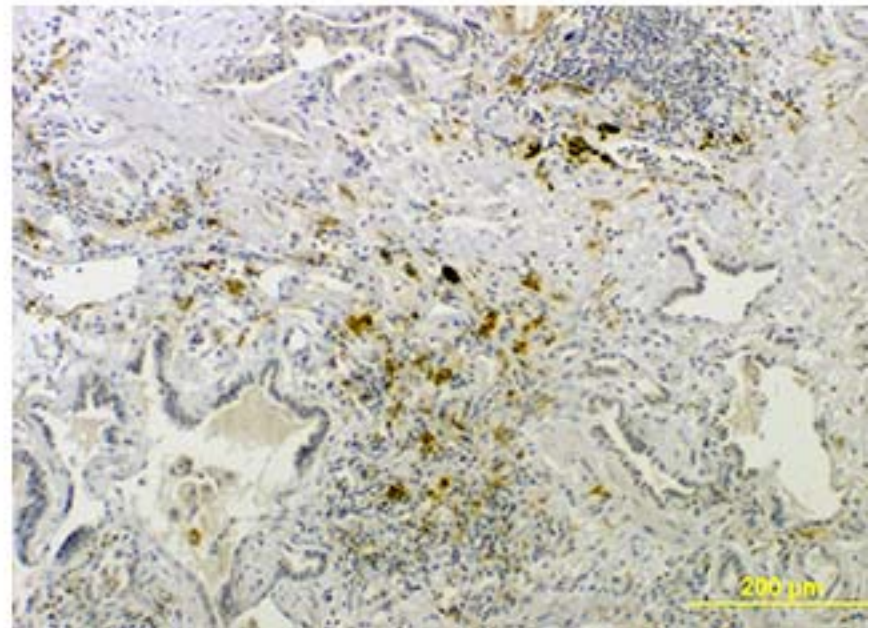

SI Figure 14. Immunohistochemistry staining of thin sections of lung from patients with Nonspecific Interstitial Pneumonia (NSIP). The indicated tissue sections were stained with m909, a human monoclonal antibody to human FR- $\beta$ , that exhibits no cross-reactivity to other folate receptor isoforms.

# **Human Inflammatory Disease IHC Staining**

Chronic Obstructive Pulmonary Disease  
(COPD)

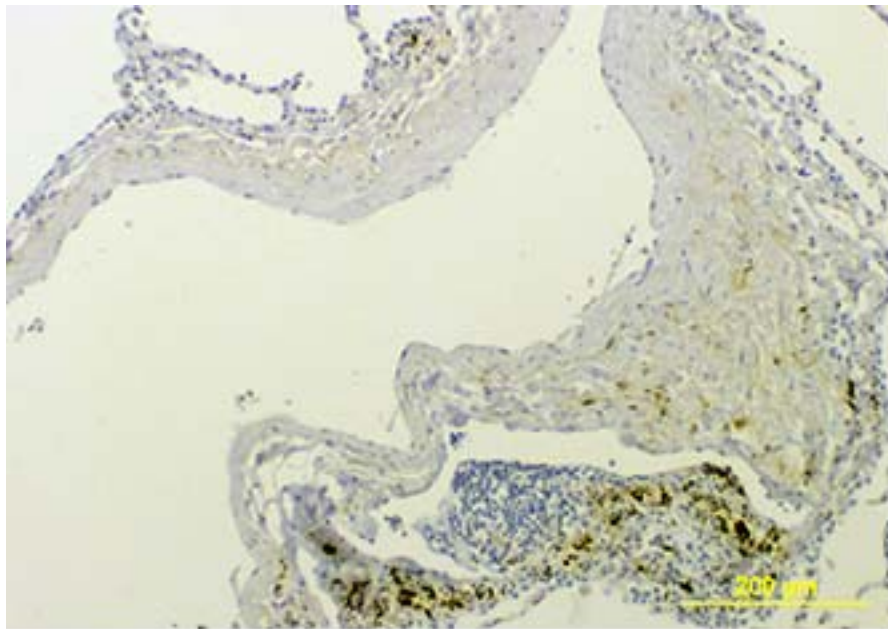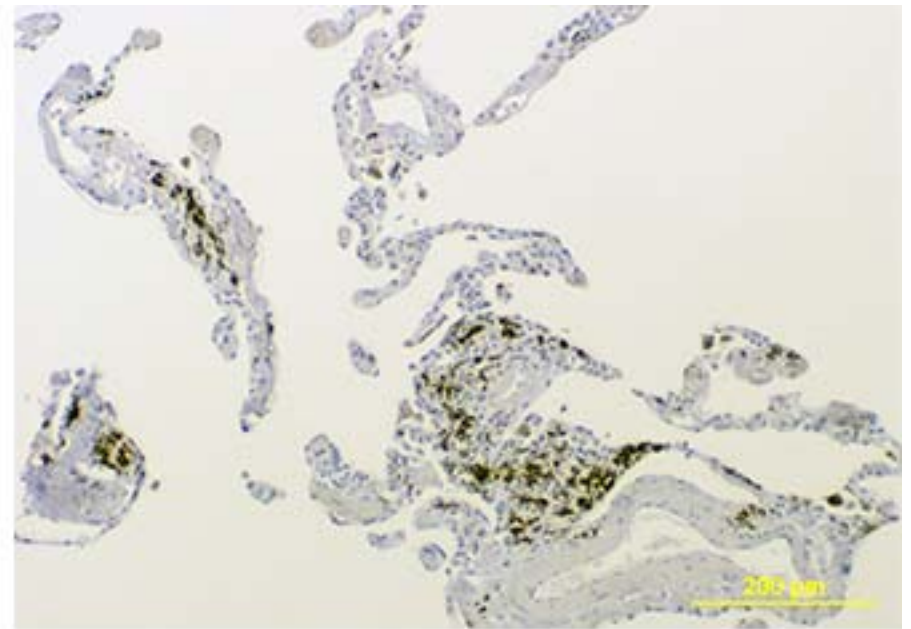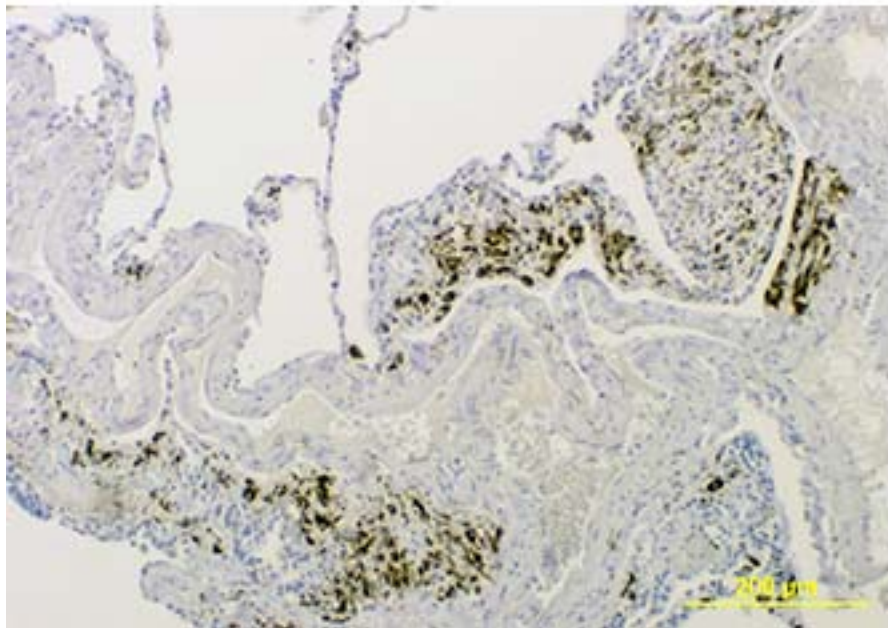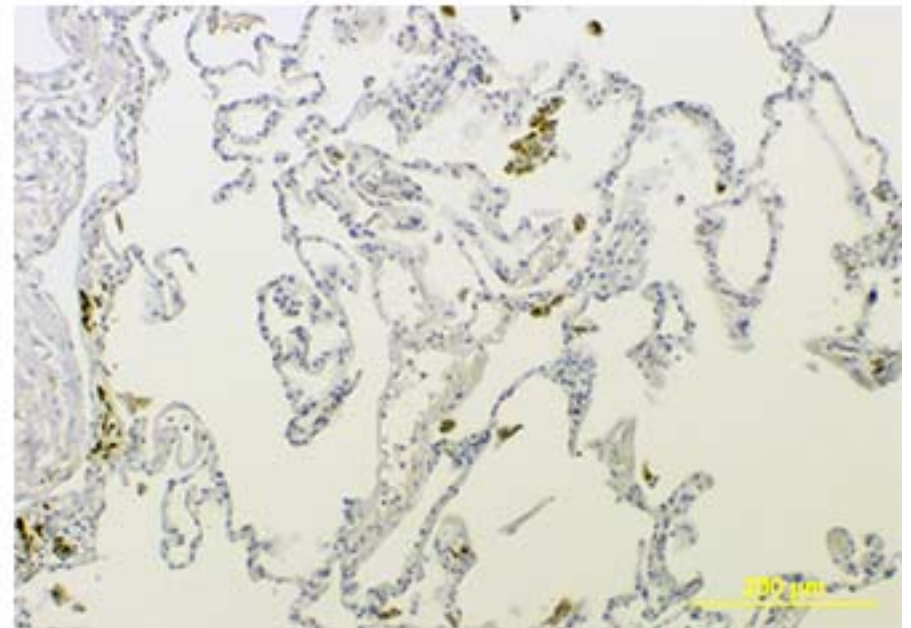

SI Figure 15. Immunohistochemistry staining of thin sections of lung from patients with Chronic Obstructive Pulmonary Disorder (COPD). The indicated tissue sections were stained with m909, a human monoclonal antibody to human FR- $\beta$ , that exhibits no cross-reactivity to other folate receptor isoforms.



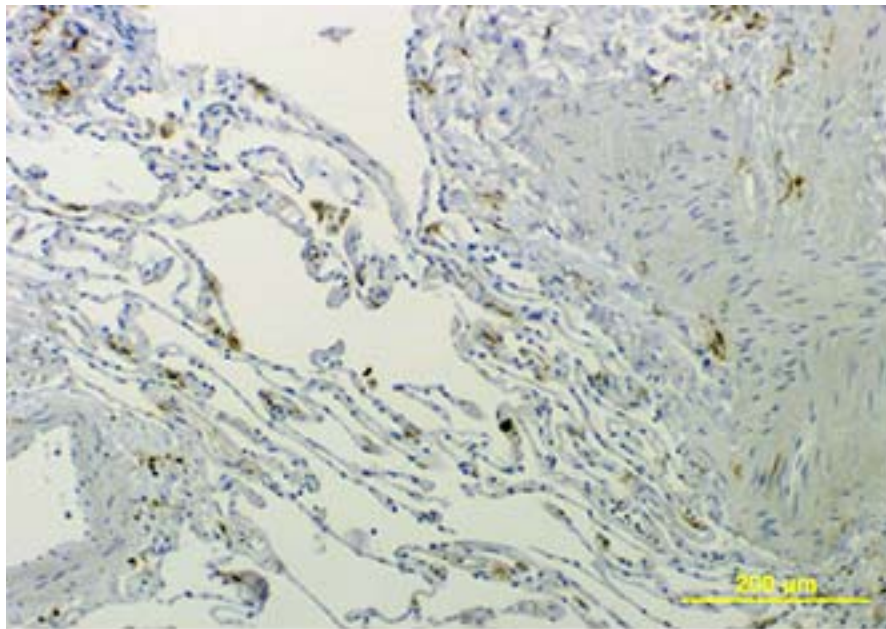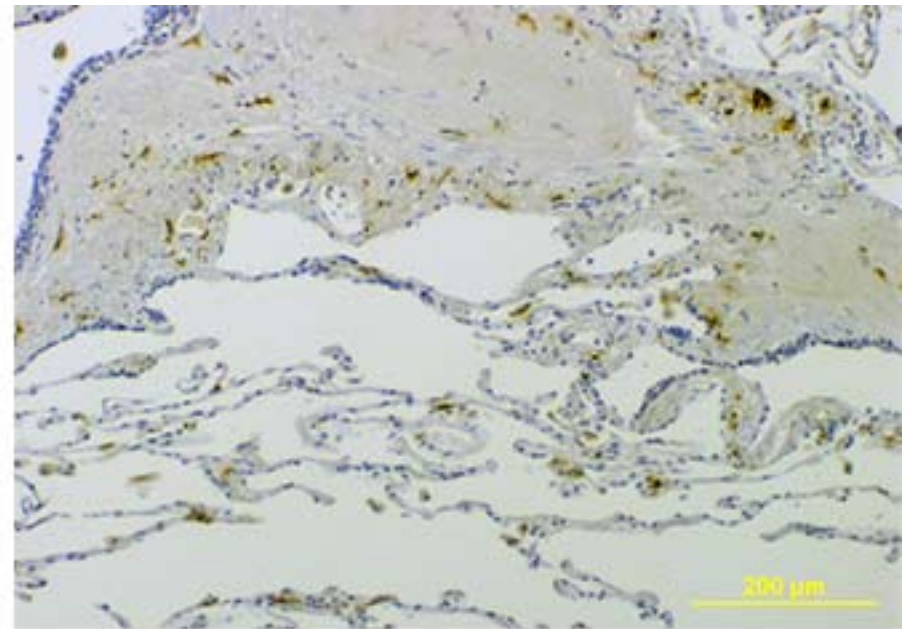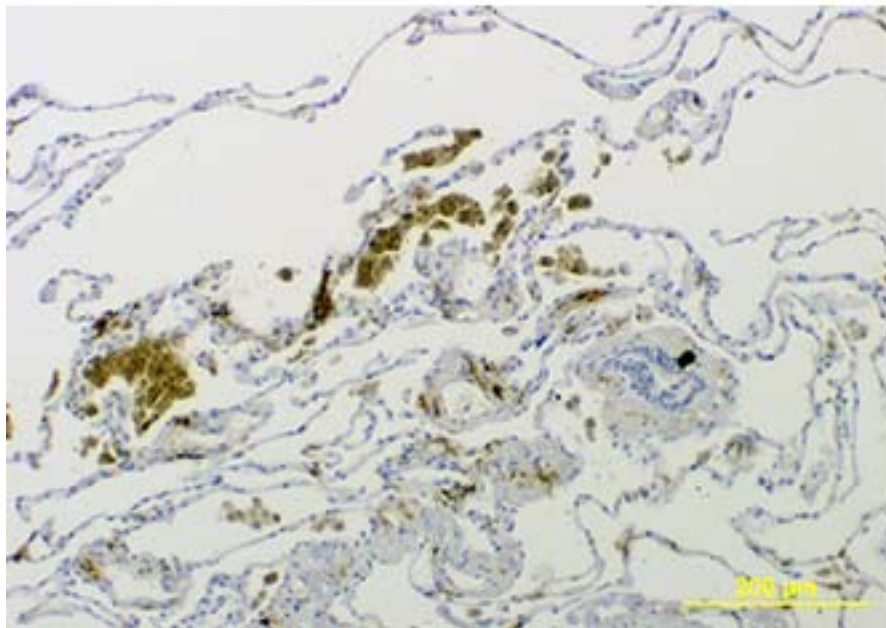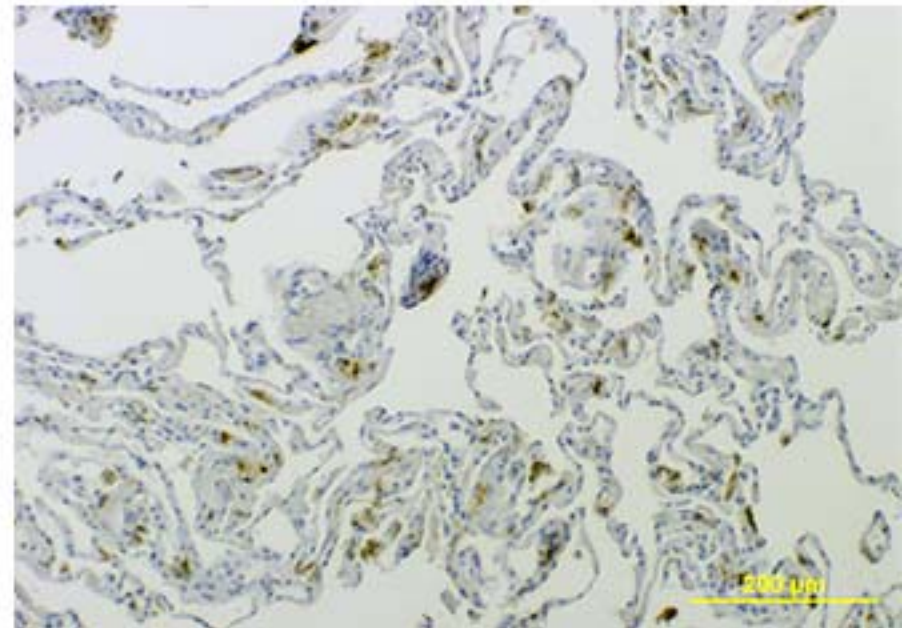

SI Figure 16. Immunohistochemistry staining of thin sections of lung from patients with Chronic Obstructive Pulmonary Disorder (COPD). The indicated tissue sections were stained with m909, a human monoclonal antibody to human FR- $\beta$ , that exhibits no cross-reactivity to other folate receptor isoforms.

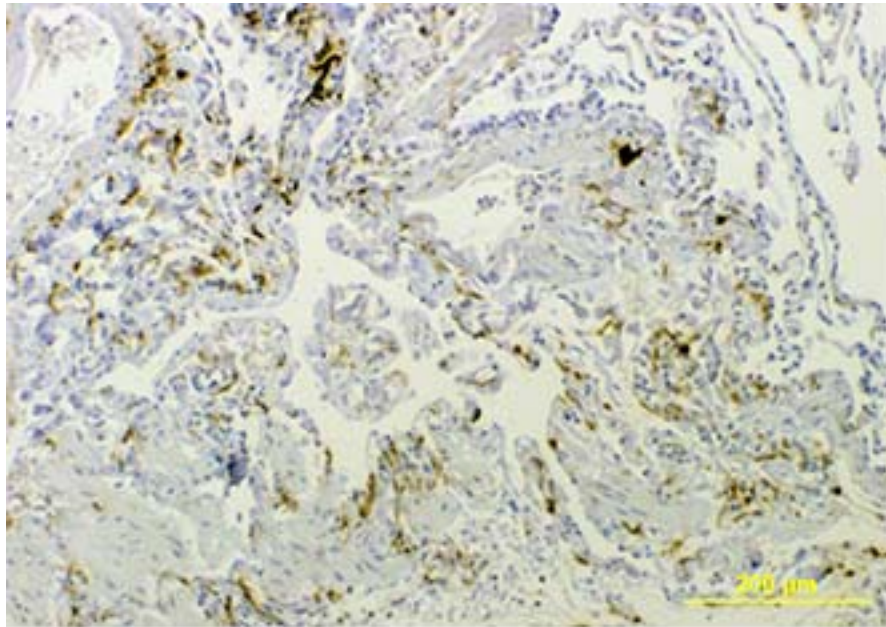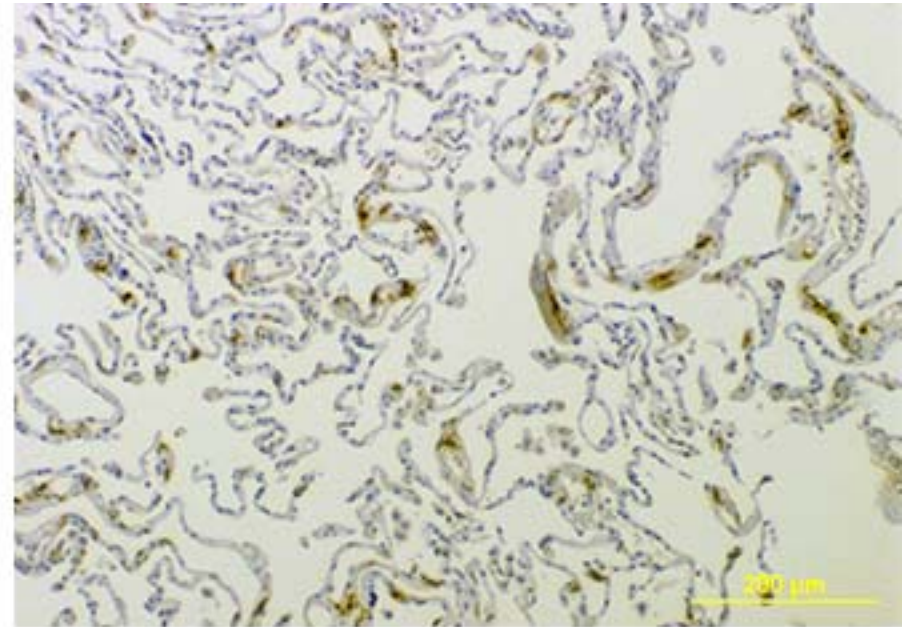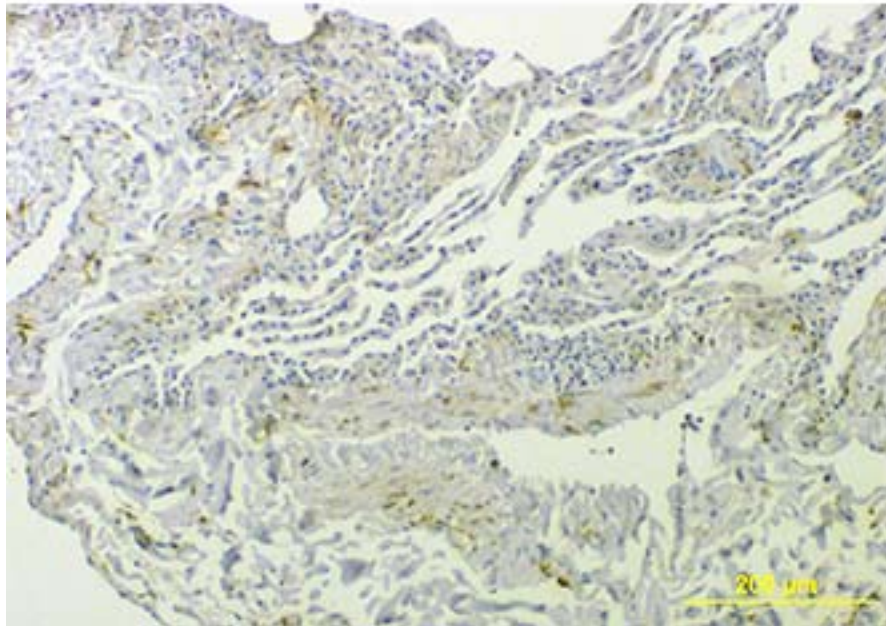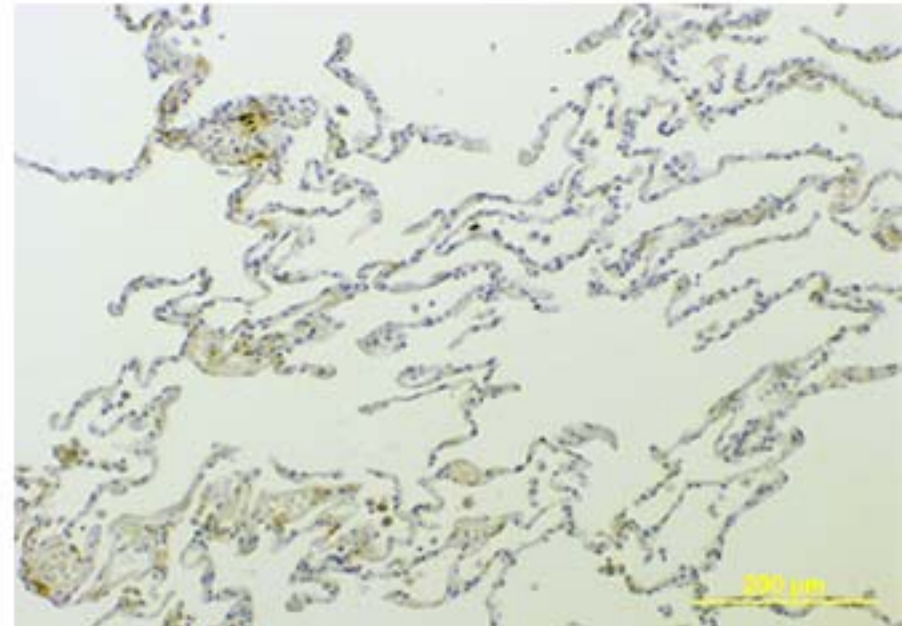

SI Figure 17. Immunohistochemistry staining of thin sections of lung from patients with Chronic Obstructive Pulmonary Disorder (COPD). The indicated tissue sections were stained with m909, a human monoclonal antibody to human FR- $\beta$ , that exhibits no cross-reactivity to other folate receptor isoforms.

# **Human Inflammatory Disease IHC Staining**

Rheumatoid Arthritis  
(RA)

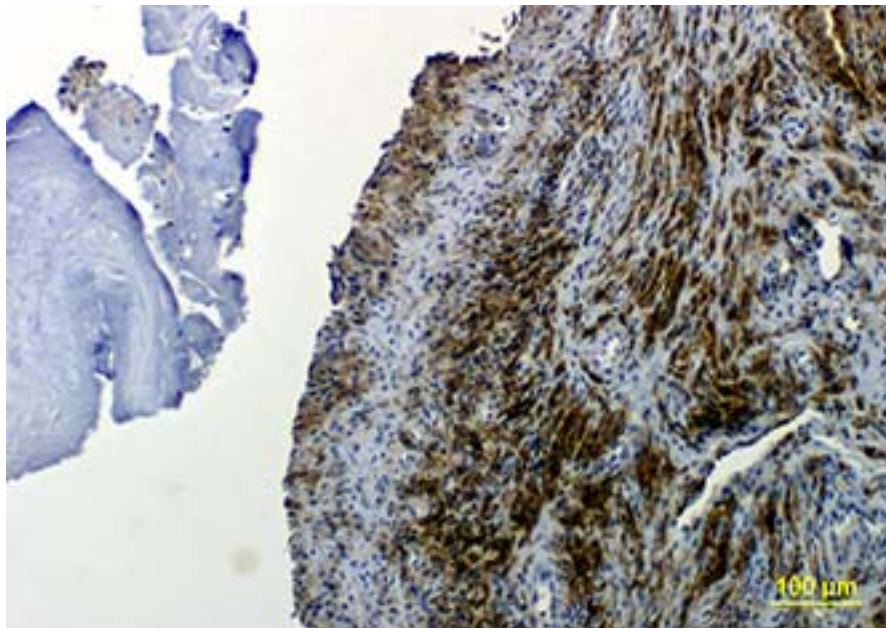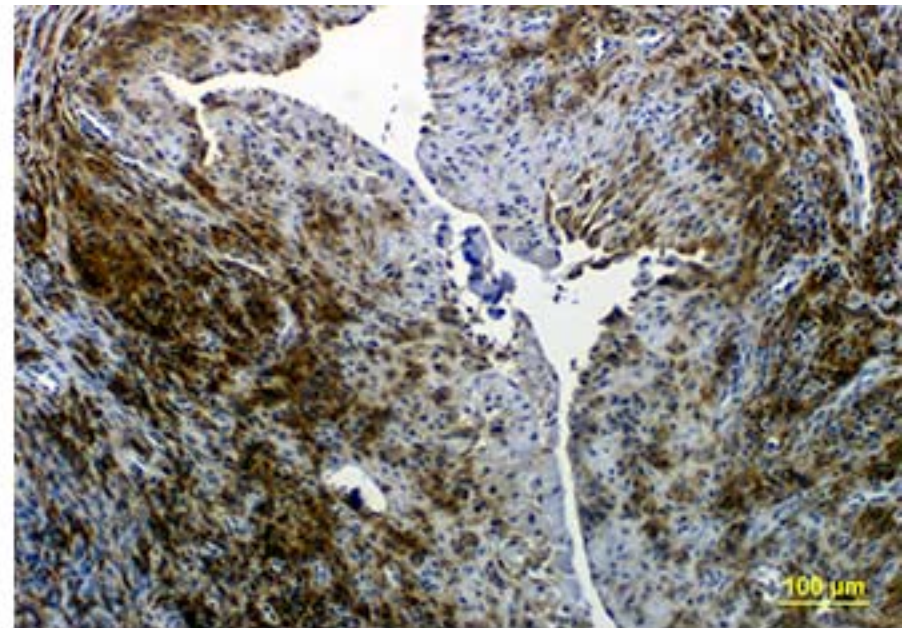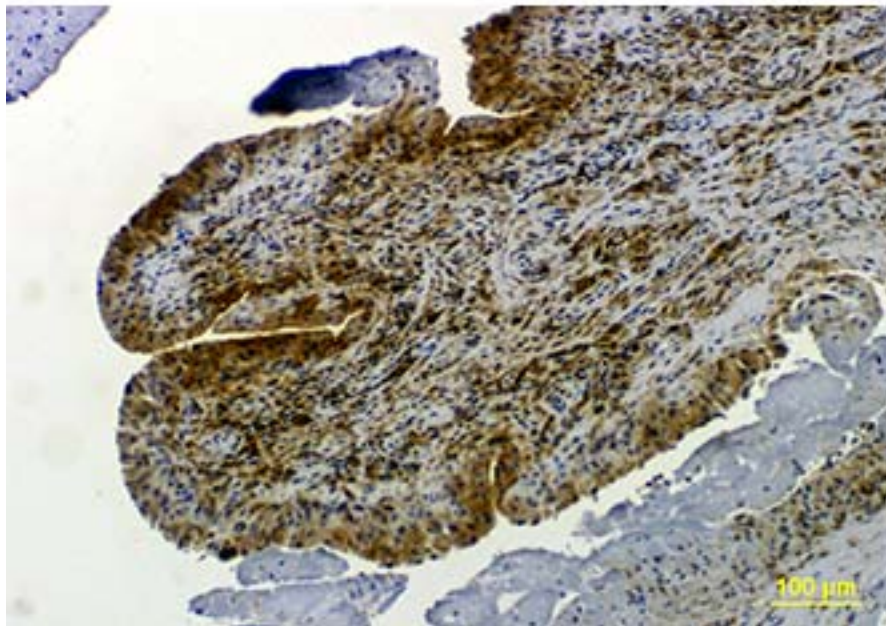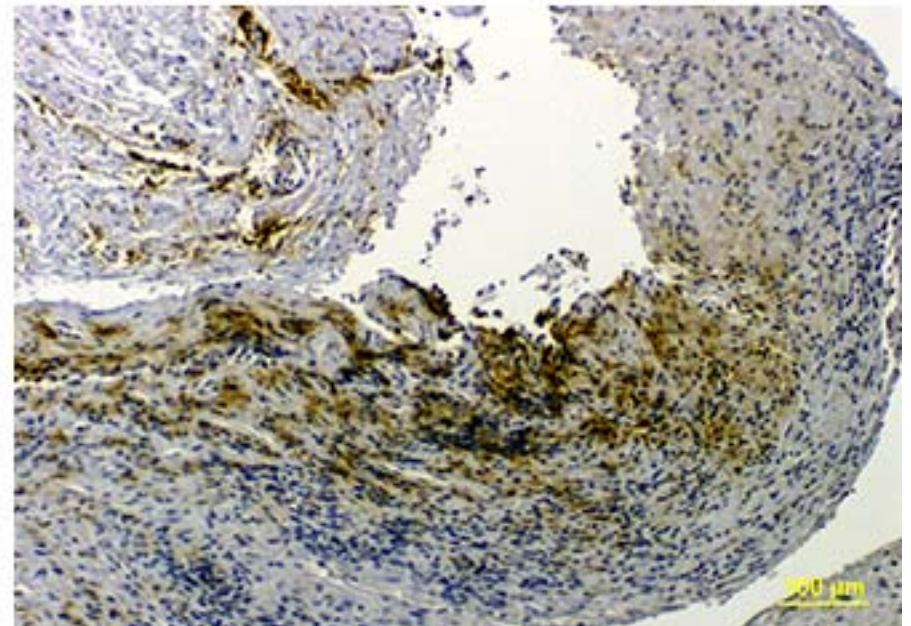

SI Figure 18. Immunohistochemistry staining of thin sections of synovium from patients with Rheumatoid Arthritis (RA). The indicated tissue sections were stained with m909, a human monoclonal antibody to human FR- $\beta$ , that exhibits no cross-reactivity to other folate receptor isoforms.

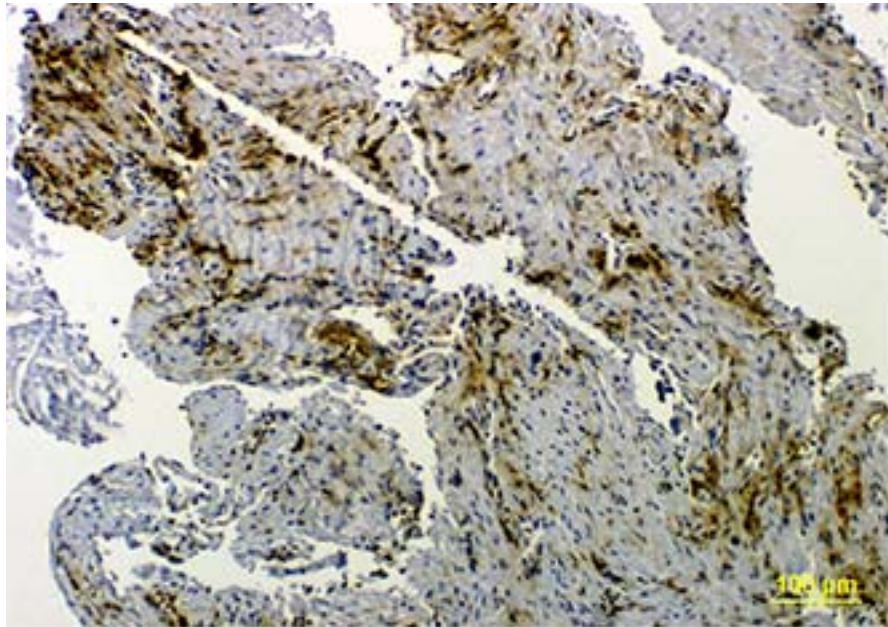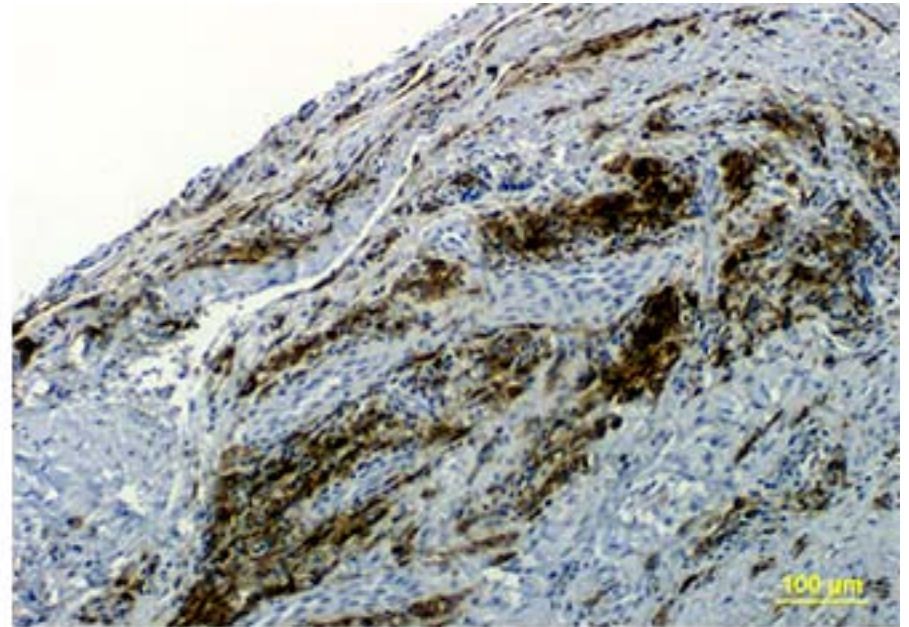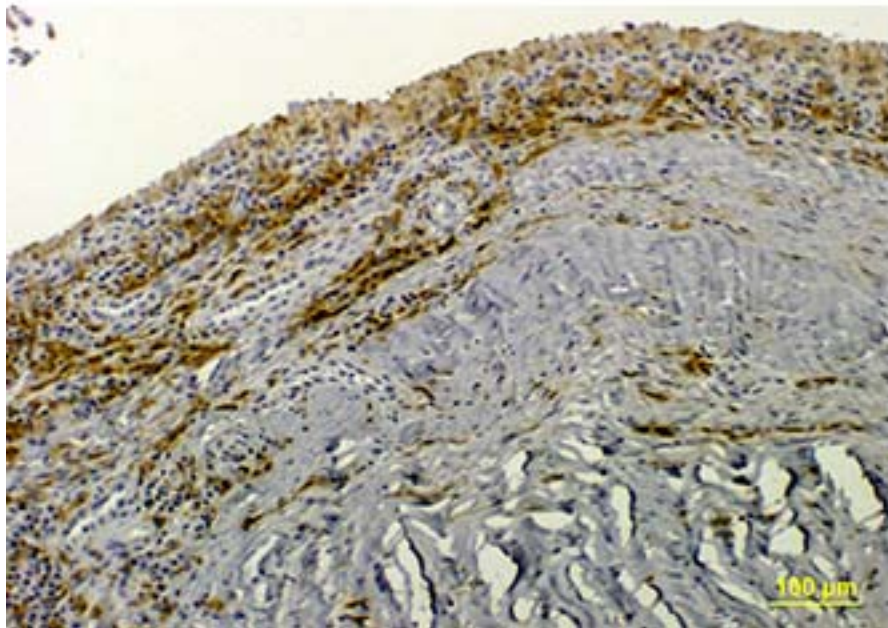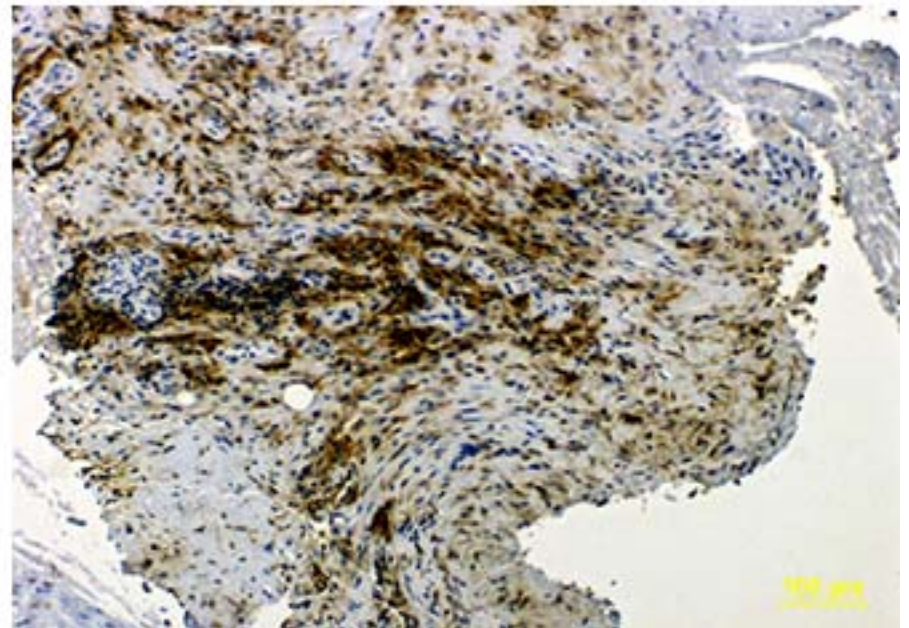

SI Figure 19. Immunohistochemistry staining of thin sections of synovium from patients with Rheumatoid Arthritis (RA). The indicated tissue sections were stained with m909, a human monoclonal antibody to human FR- $\beta$ , that exhibits no cross-reactivity to other folate receptor isoforms.

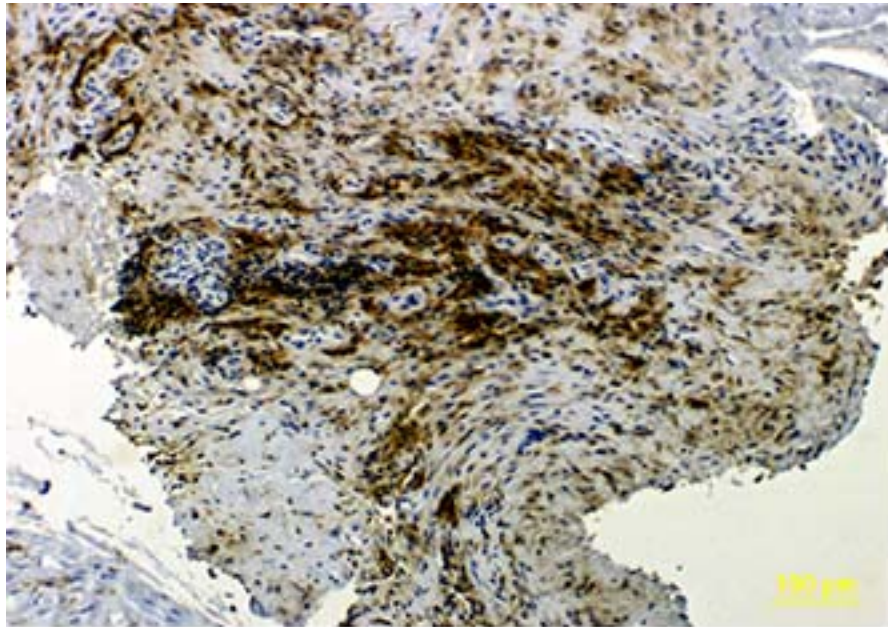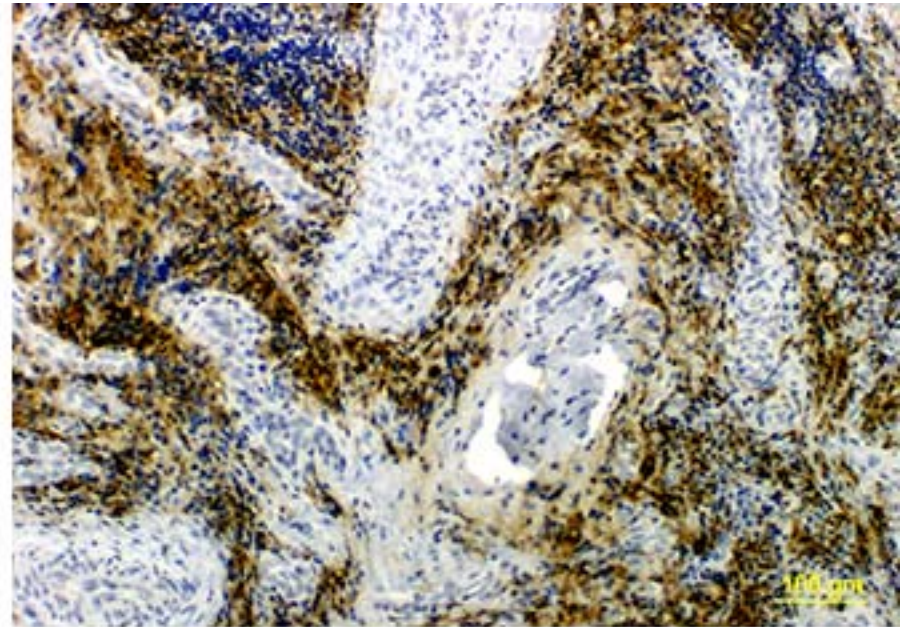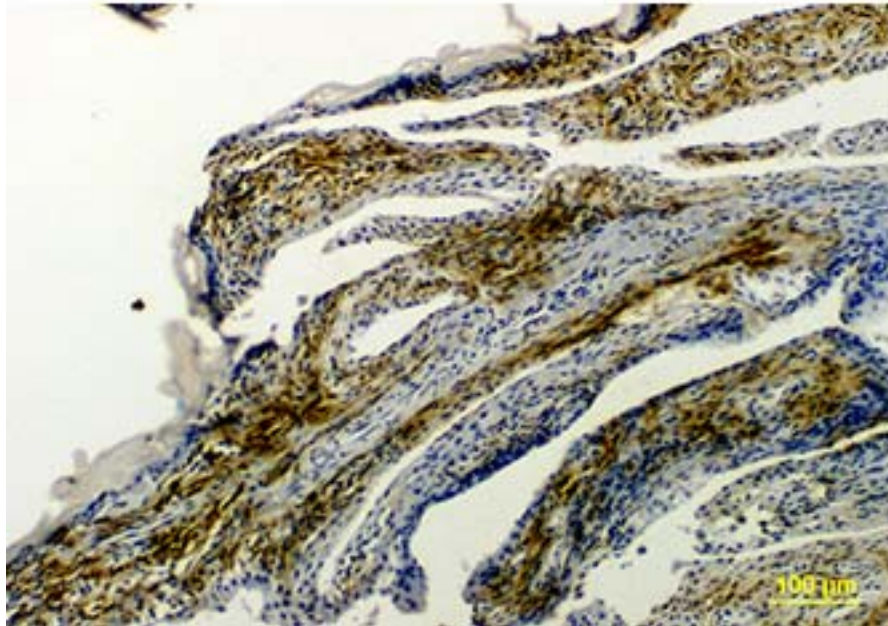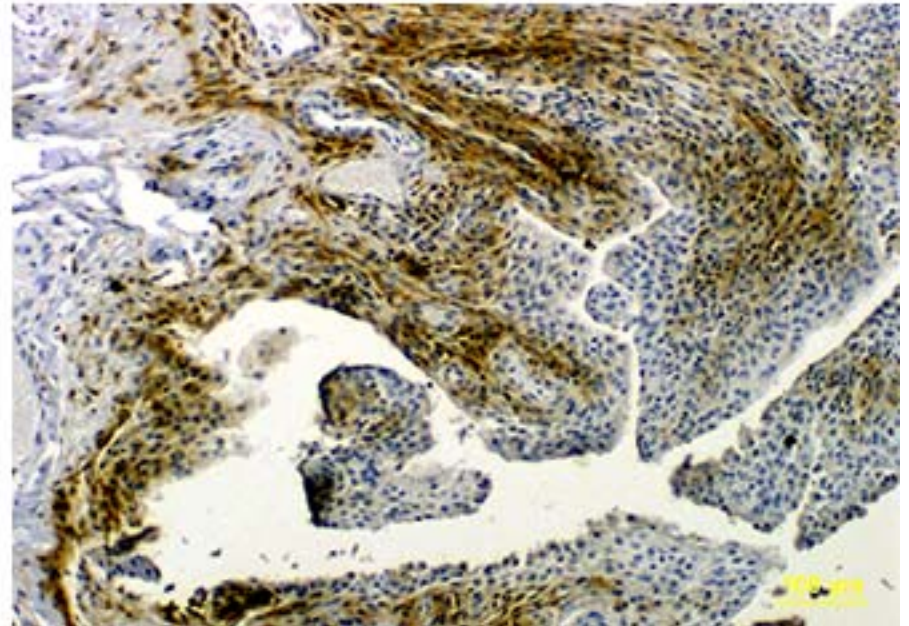

SI Figure 20. Immunohistochemistry staining of thin sections of synovium from patients with Rheumatoid Arthritis (RA). The indicated tissue sections were stained with m909, a human monoclonal antibody to human FR- $\beta$ , that exhibits no cross-reactivity to other folate receptor isoforms.

# **Human Inflammatory Disease IHC Staining**

Systemic Lupus Erythematosus  
(Lupus)

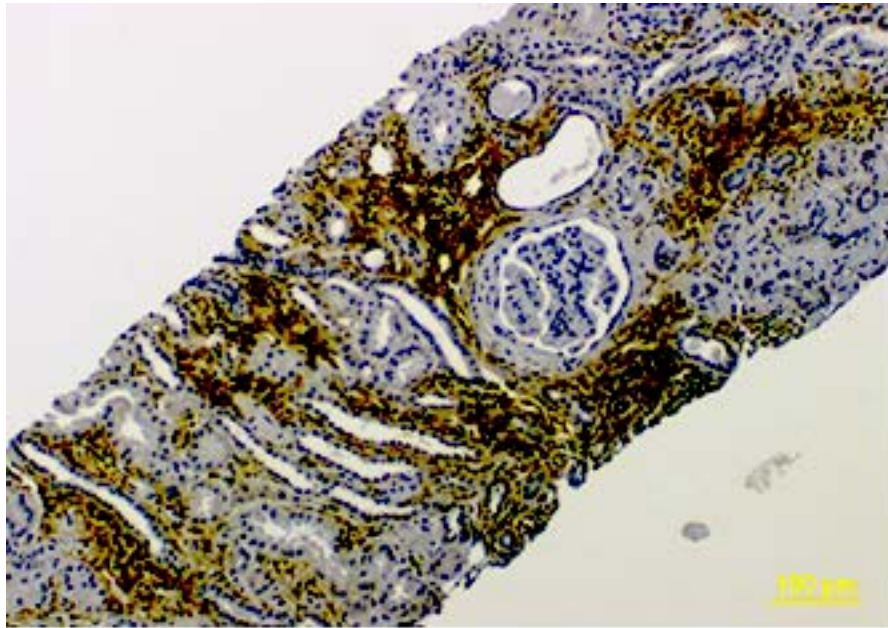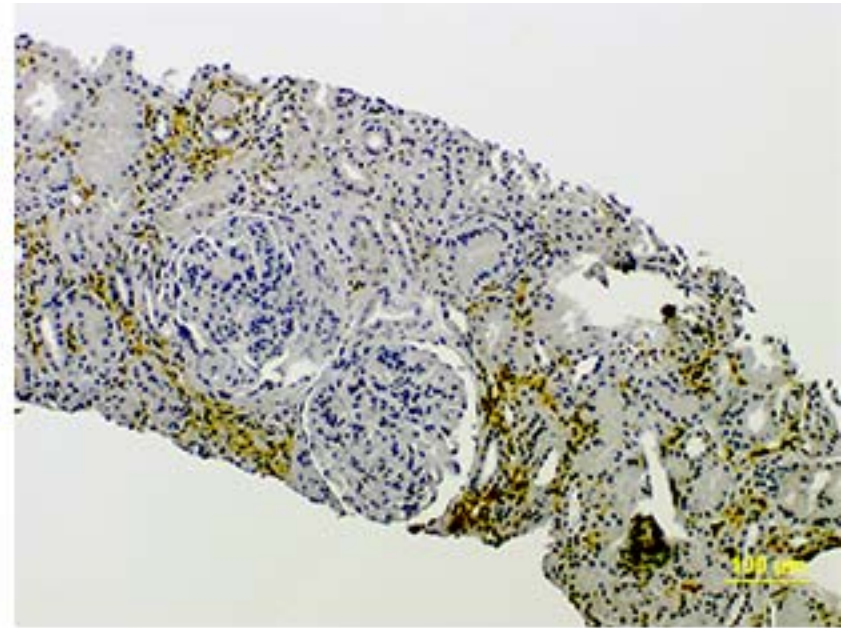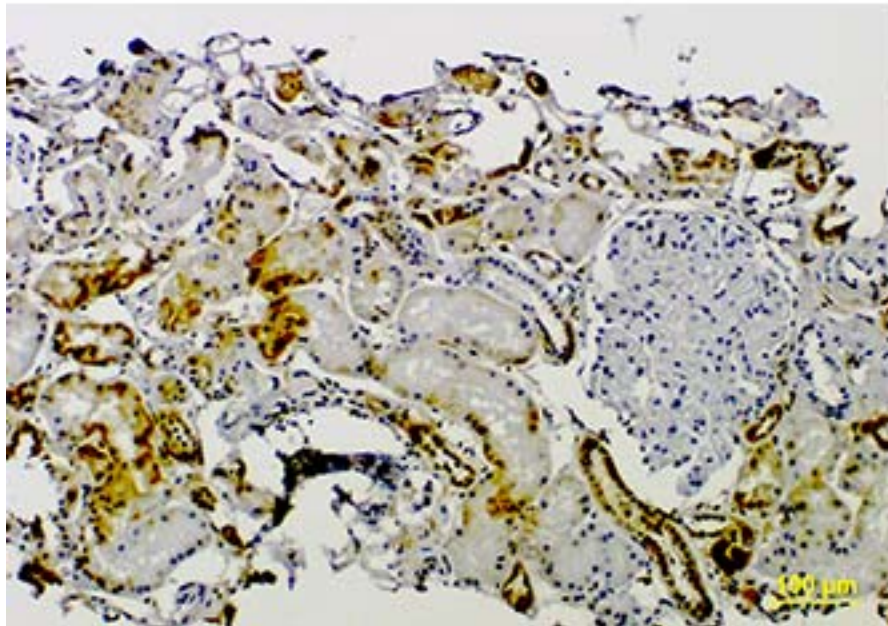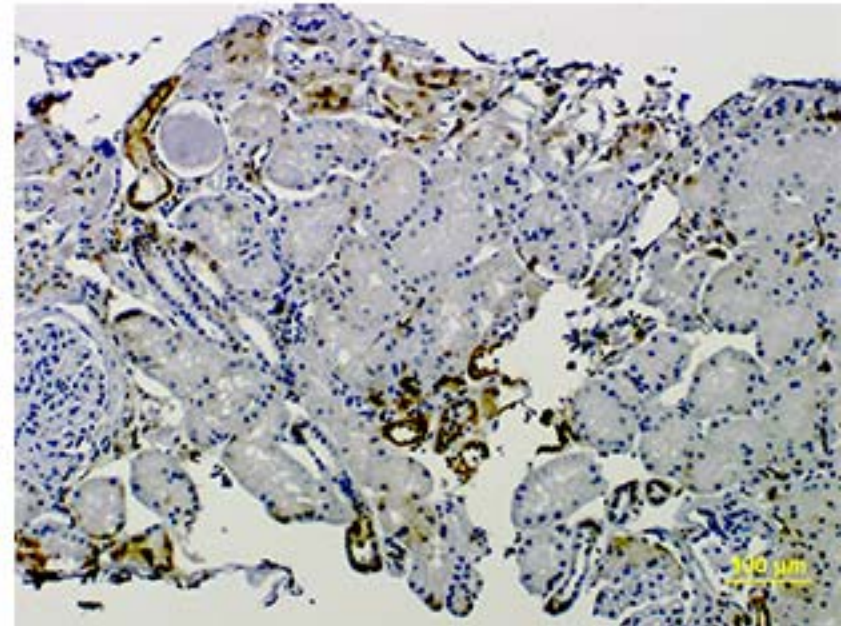

SI Figure 21. Immunohistochemistry staining of thin sections of kidney from patients with Systemic Lupus Erythematosus (Lupus). The indicated tissue sections were stained with m909, a human monoclonal antibody to human FR- $\beta$ , that exhibits no cross-reactivity to other folate receptor isoforms.



# **Human Inflammatory Disease IHC Staining**

Psoriasis

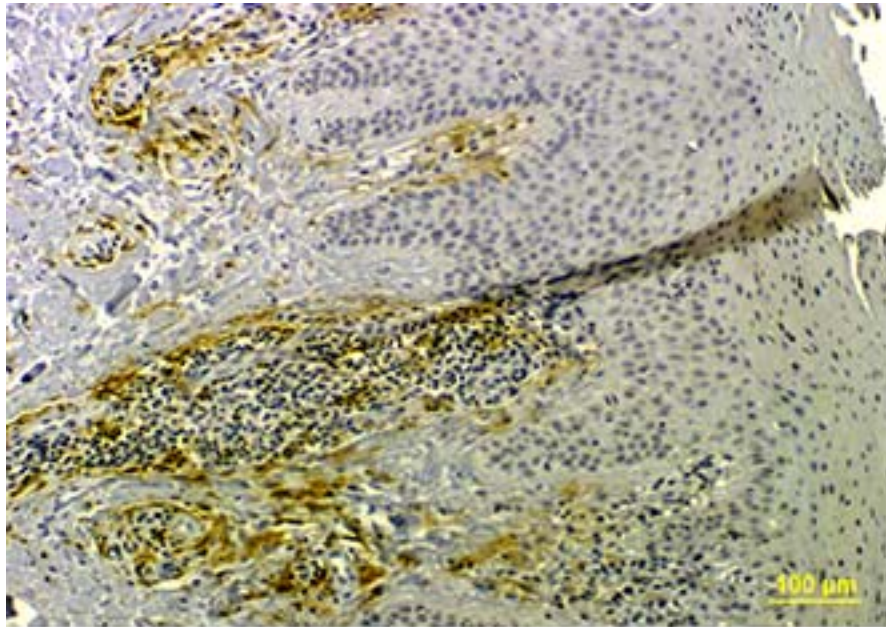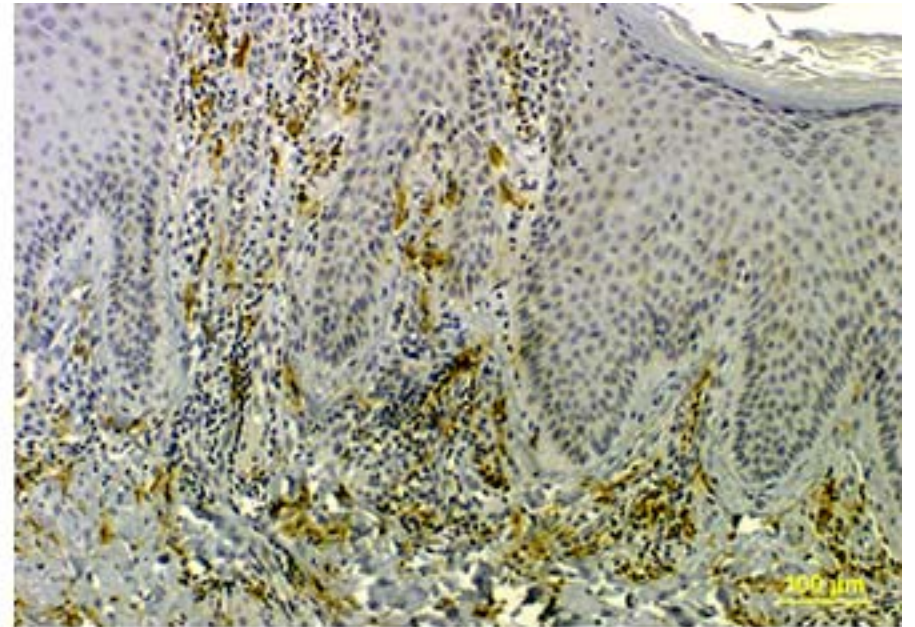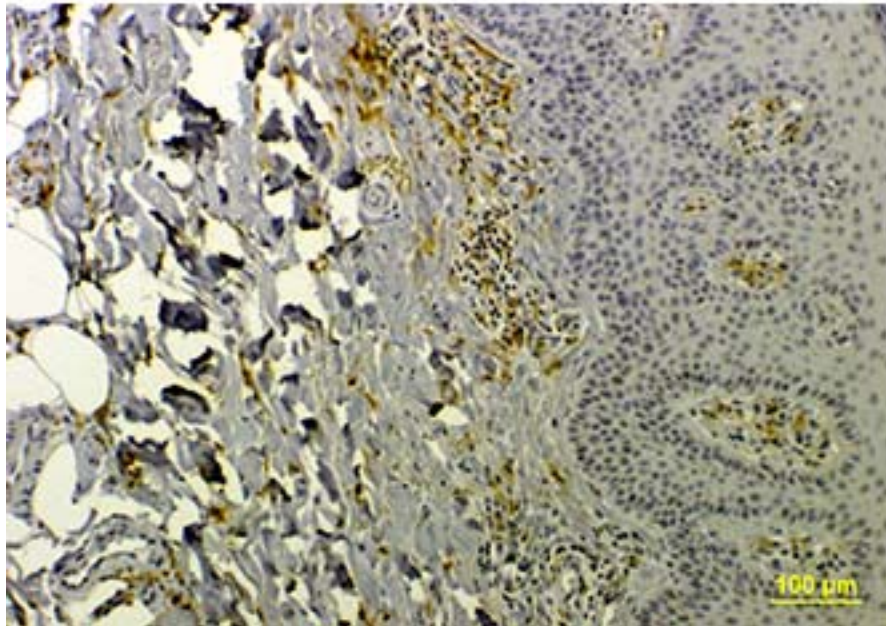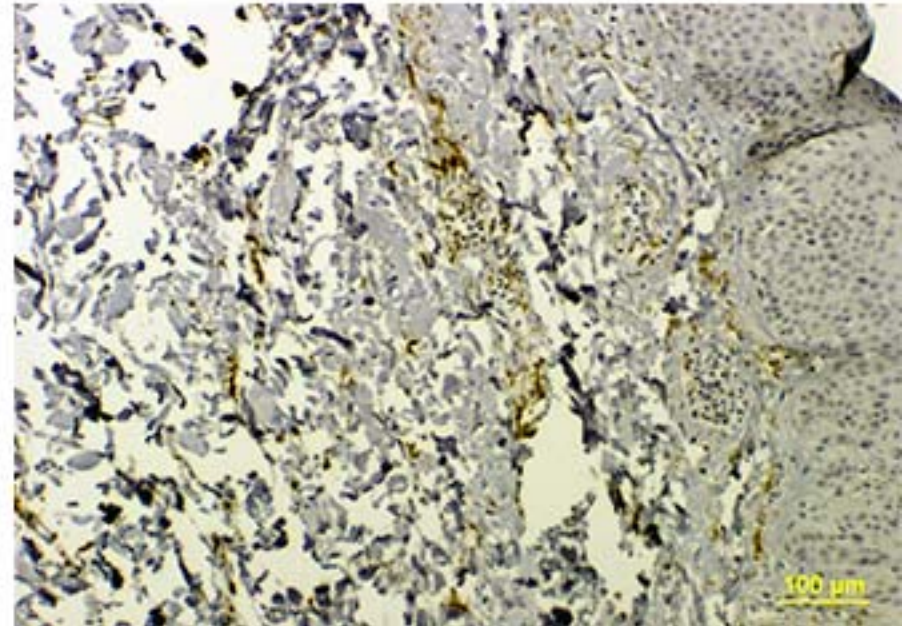

SI Figure 22. Immunohistochemistry staining of thin sections of skin from patients with Psoriasis. The indicated tissue sections were stained with m909, a human monoclonal antibody to human FR- $\beta$ , that exhibits no cross-reactivity to other folate receptor isoforms.

# **Human Inflammatory Disease IHC Staining**

Scleroderma

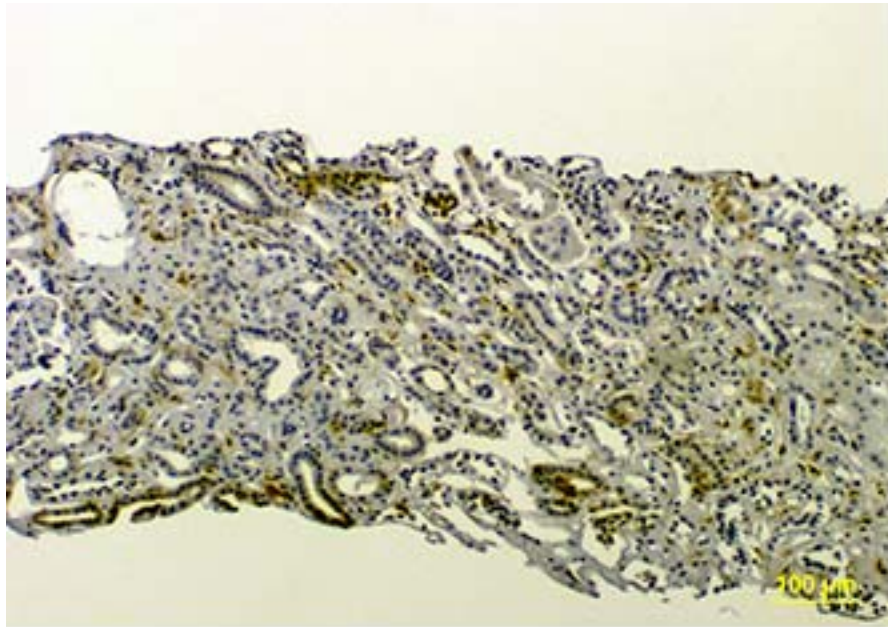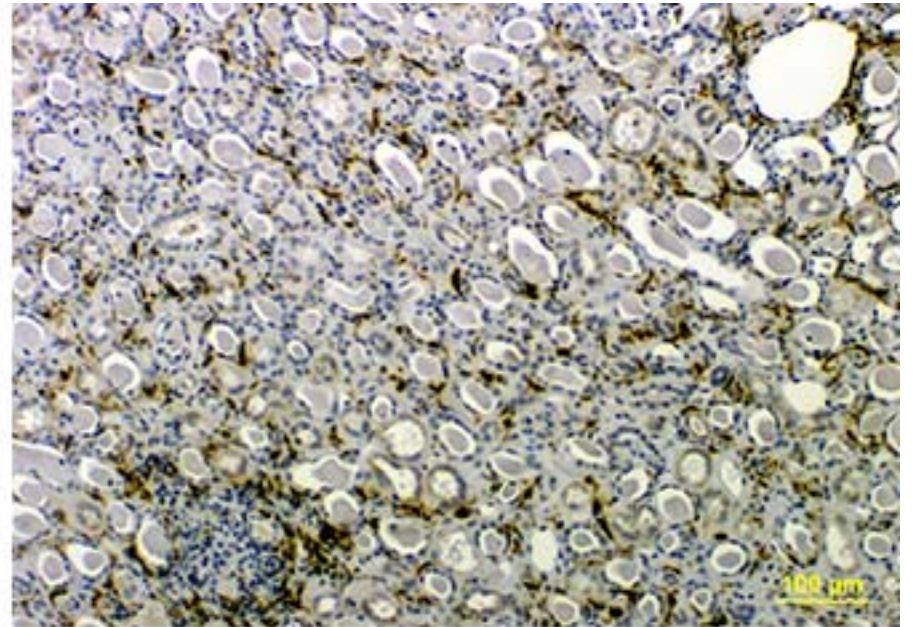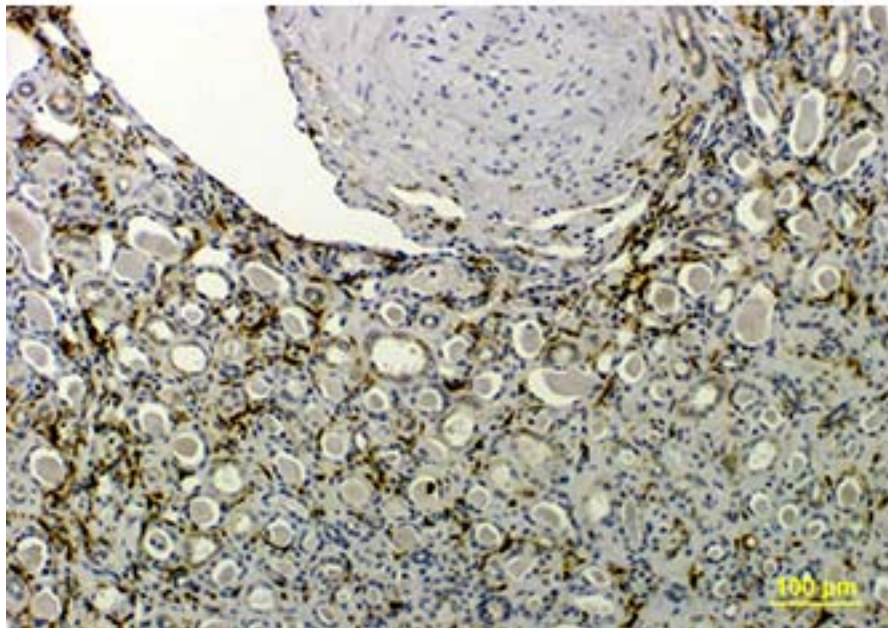

SI Figure 23. Immunohistochemistry staining of thin sections of skin from patients with Scleroderma. The indicated tissue sections were stained with m909, a human monoclonal antibody to human FR- $\beta$ , that exhibits no cross-reactivity to other folate receptor isoforms.

**ADCC**

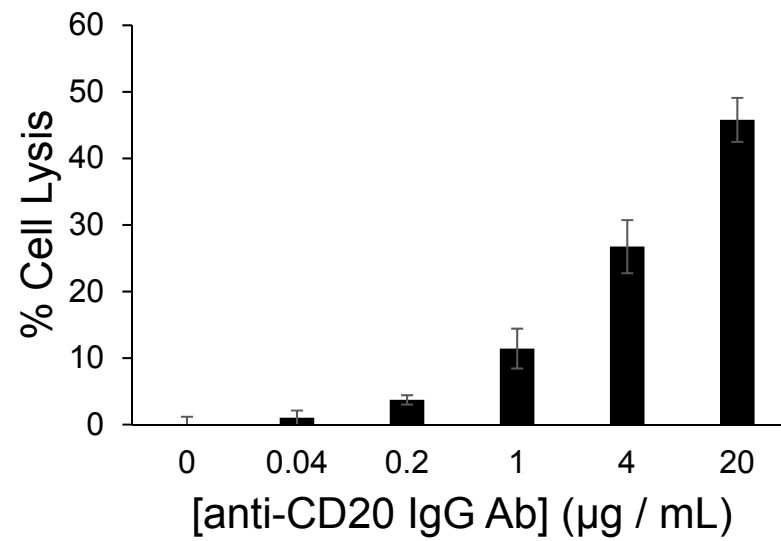

SI Figure 24. Demonstration of ADCC using a well-established positive control. Human PMBCs were isolated from fresh human blood and treated with the indicated concentrations of anti-CD20 antibody. After 24 hours, cell death was determined via an LDH assay.

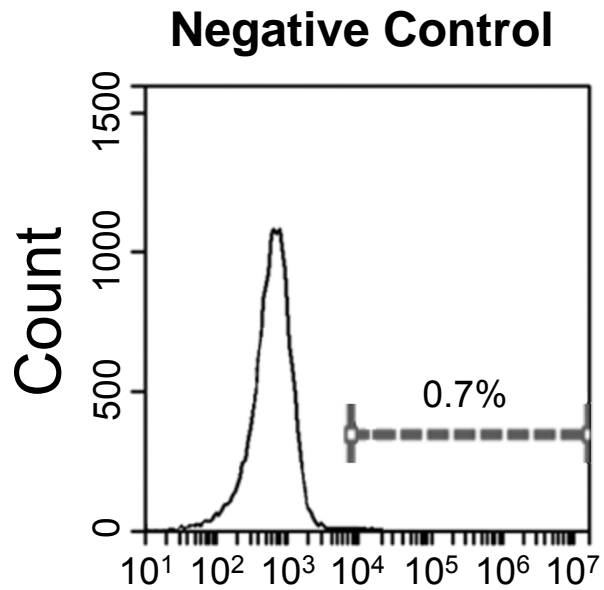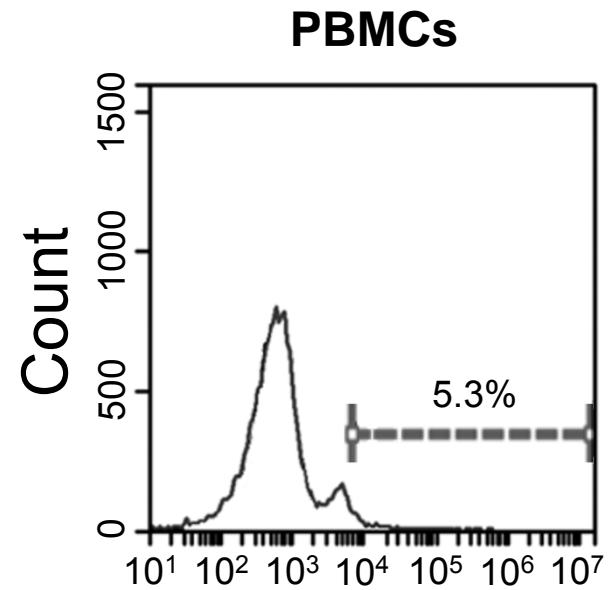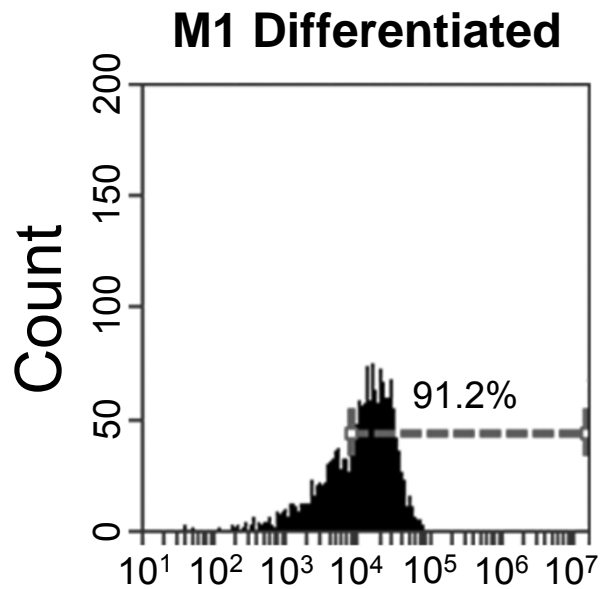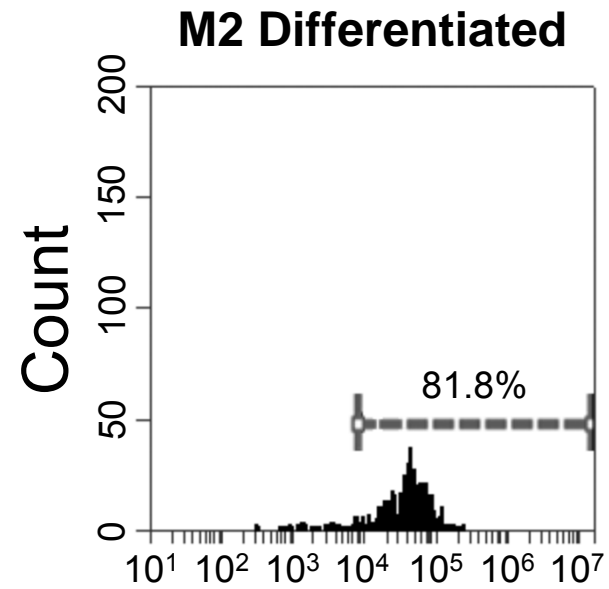

SI Figure 25. Quantitation of the percent of folate receptor beta positive cells in untreated and differentiated human PMBCs. Human PMBCs were isolated from fresh human blood and examined before differentiation or differentiated into M1 or M2 like macrophages as described in Methods. Cells were then incubated with FITC-labeled m909 antibody for 0.5 hours. After washing, bound fluorescence was determined via flow cytometry.

### 1-way ANOVA - m909 ADCC

|                                      | [m909] ( $\mu\text{g/mL}$ ) |    |     |        |     |      |        |     |      |        |      |       |         |    |      |        |      |       |
|--------------------------------------|-----------------------------|----|-----|--------|-----|------|--------|-----|------|--------|------|-------|---------|----|------|--------|------|-------|
|                                      | 0.0002                      |    |     | 0.002  |     |      | 0.02   |     |      | 0.2    |      |       | 2       |    |      | 20     |      |       |
| SS (Between   Within   Total)        | 713                         | 15 | 728 | 1893   | 652 | 2545 | 1805   | 176 | 1981 | 2463   | 2564 | 5027  | 3417    | 43 | 3460 | 5722   | 3627 | 9350  |
| df (Between   Within   Total)        | 2                           | 10 | 12  | 2      | 10  | 12   | 2      | 10  | 12   | 2      | 10   | 12    | 2       | 10 | 12   | 2      | 10   | 12    |
| MS (Between   Within)                | 356.5                       |    | 3.7 | 946.7  |     | 81.5 | 902.4  |     | 44.0 | 1231.7 |      | 256.4 | 1708.4  |    | 10.9 | 2861.2 |      | 362.7 |
| F                                    | 97.385                      |    |     | 11.617 |     |      | 20.536 |     |      | 4.803  |      |       | 157.447 |    |      | 7.888  |      |       |
| p-value                              | 0.0004                      |    |     | 0.0043 |     |      | 0.0079 |     |      | 0.0345 |      |       | 0.0002  |    |      | 0.0088 |      |       |
| <b>post-hoc Tukey Test (p-value)</b> |                             |    |     |        |     |      |        |     |      |        |      |       |         |    |      |        |      |       |
| No Macs vs. M1 Macs                  | 0.0010                      |    |     | 0.0078 |     |      | 0.0281 |     |      | 0.0494 |      |       | 0.0010  |    |      | 0.0121 |      |       |
| No Macs vs. M2 Macs                  | 0.0026                      |    |     | 0.0059 |     |      | 0.0080 |     |      | 0.0426 |      |       | 0.0010  |    |      | 0.0131 |      |       |
| M1 Macs vs. M2 Macs                  | 0.0172                      |    |     | 0.9000 |     |      | 0.3188 |     |      | 0.9000 |      |       | 0.6706  |    |      | 0.9000 |      |       |

SI Figure 26. Statistical analysis of the differences in m909-mediated ADCC of M1 and M2 macrophages (Macs) (from **Fig. 2C**). Human PMBCs were isolated from blood and differentiated into M1 or M2 macrophages prior to isolation and incubation with undifferentiated PBMCs in the presence of various concentrations of m909. After 24 hours, cell death was determined via the LDH assay. A 1-way ANOVA was used to determine if there were any significant differences in cell killing between undifferentiated PBMCs, M1- and M2-like differentiated macrophages. A p-value < 0.05 was considered significant and highlighted in yellow.



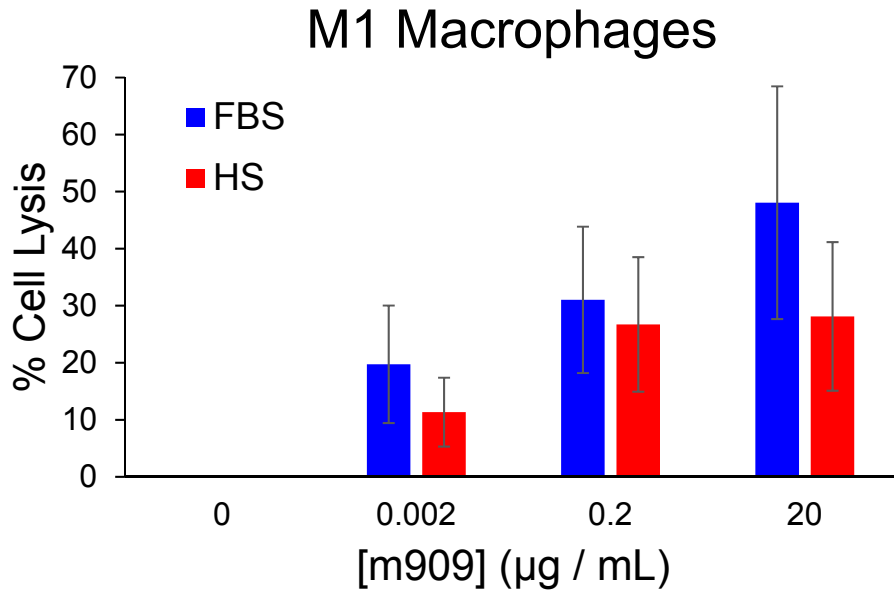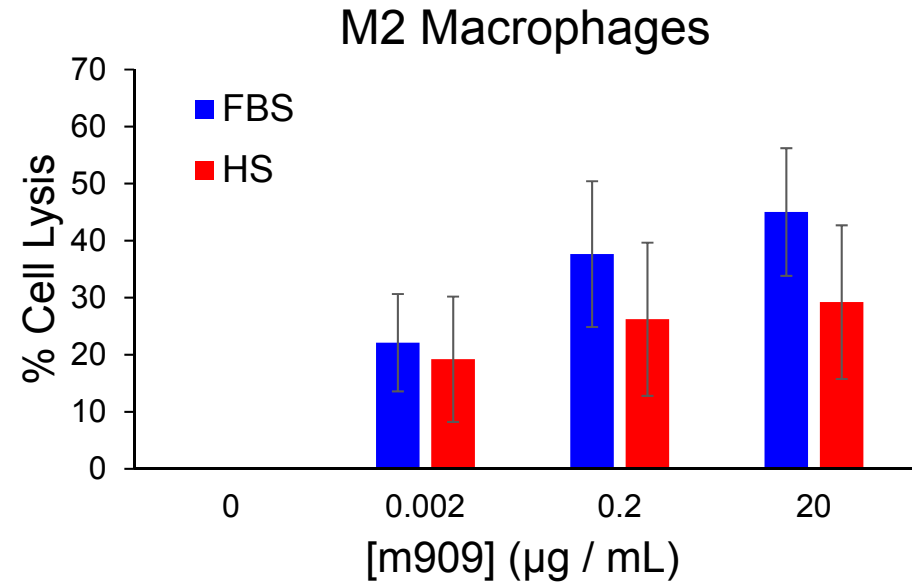

SI Figure 27. Effect of human serum on m909-mediated ADCC of FR- $\beta$ -positive M1 and M2 macrophages. Human PMBCs were isolated from blood and differentiated into M1 and M2 macrophages as described in Methods. Macrophages were isolated and added to undifferentiated PBMCs in the presence of various concentrations of m909. After 24 hours, cell death was determined via the LDH assay. A t-test was used to determine if there were any significant differences in cell killing between HS and FBS. Assuming a p-value < 0.05 indicates a significant difference, human serum had no significant effect on m909-mediated ADCC.

# Thioglycollate Model

|                 | t-test (p-value) |        |        |        |
|-----------------|------------------|--------|--------|--------|
|                 | Time (hours)     |        |        |        |
|                 | 8                | 24     | 48     | 96     |
| Macrophages     | 0.0026           | 0.0015 | 0.0007 | 0.0002 |
| Neutrophil      | 0.0441           | 0.0041 | 0.0362 | 0.0073 |
| Dendritic Cells | 0.0670           | 0.0652 | 0.2691 | 0.0094 |
| NK cells        | 0.0992           | 0.0654 | 0.0919 | 0.0002 |
| T-cells         | 0.0695           | 0.3802 | 0.1780 | 0.1797 |
| B-cells         | 0.6073           | 0.1781 | 0.2980 | 0.0554 |

SI Figure 28. Statistical analysis of the differences in immune cell accumulation in peritoneal fluid after thioglycollate injection (from **Fig. 3A**). Mice were injected intraperitoneally with thioglycollate (1 mL of a 3% solution) and sacrificed at various times after injection. IP fluid was removed, stained with various antibodies against cell-type markers and analyzed via flow cytometry. A t-test was used to determine if there were any significant differences in immune cell numbers between healthy and thioglycollate treated animals. A p-value < 0.05 was considered significant and highlighted in yellow.

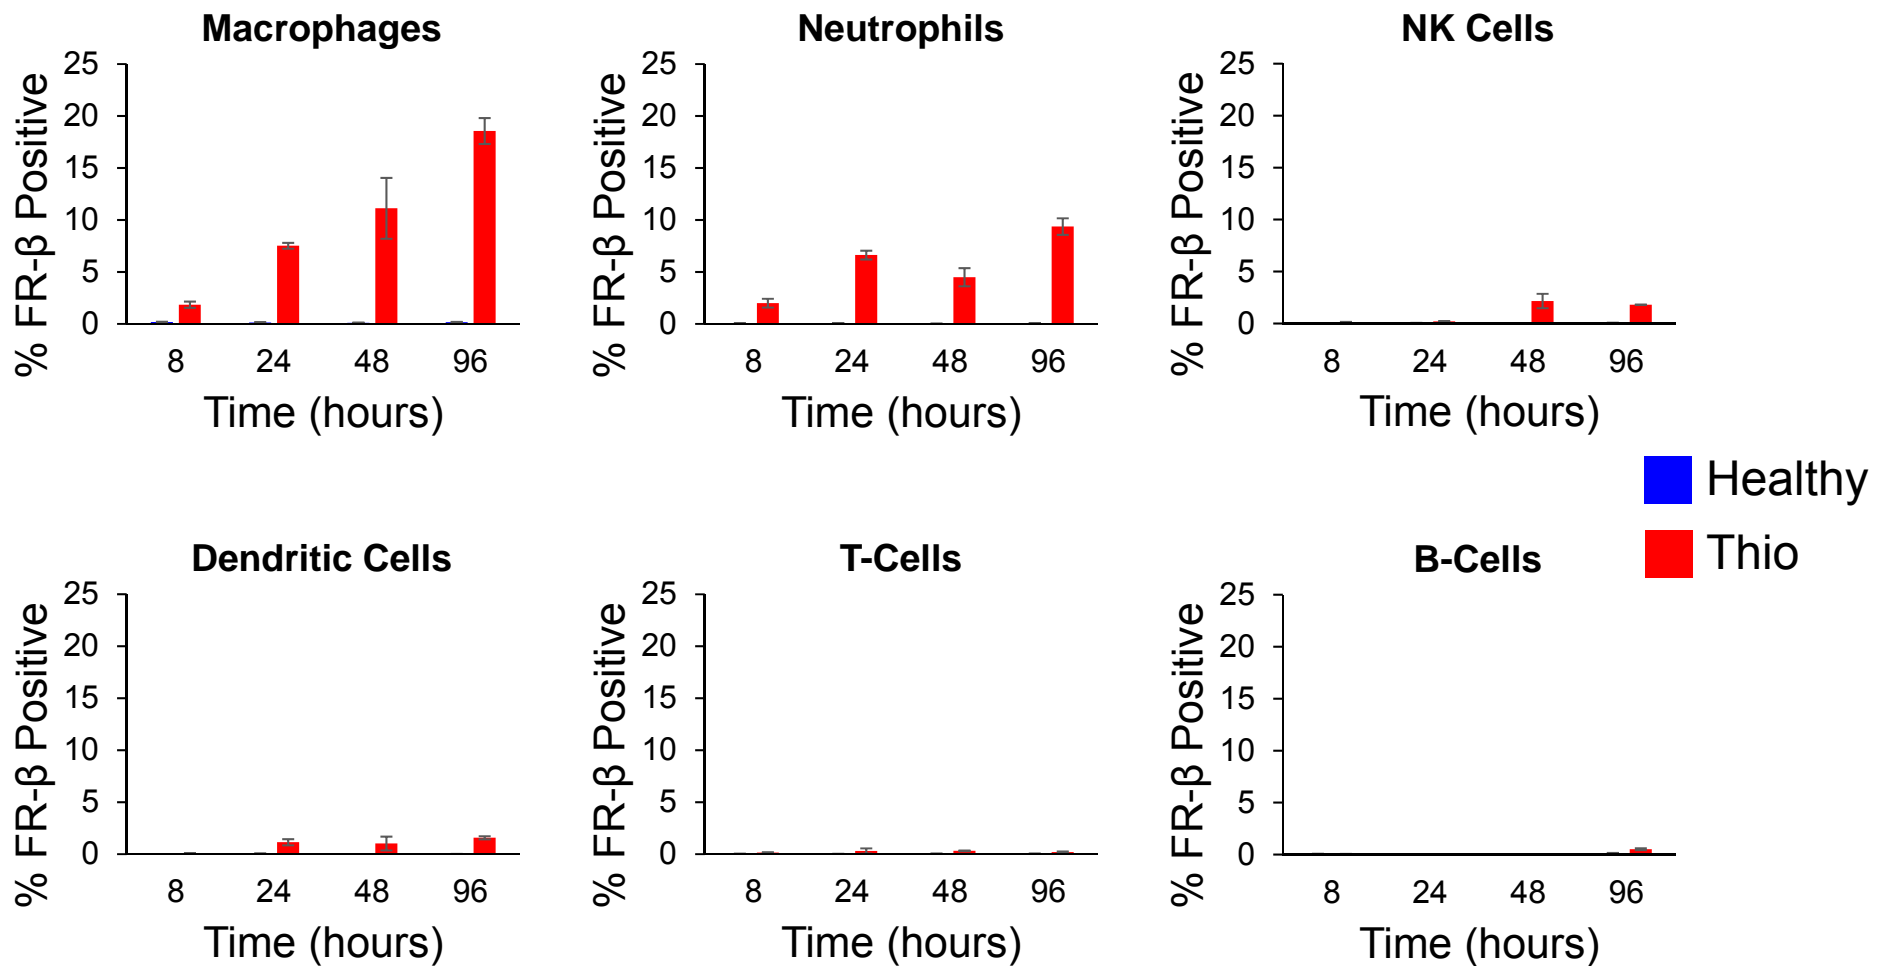

SI Figure 29. Quantitation of folate receptor beta positive (F3 positive) immune cell populations in the peritoneal fluid of mice at various times after thioglycollate injection (from **Fig. 3B**). Mice were injected IP with thioglycollate (1 mL of a 3% solution) and sacrificed at various times after the injection. IP fluid was removed, stained with various antibodies against both cell-type markers and mouse FR-β prior to analysis by flow cytometry. The percentage of each cell type that was FR-β positive is plotted versus time post-thioglycollate injection. Error bars represent standard error.

|                 | t-test (p-value) |        |        |        |
|-----------------|------------------|--------|--------|--------|
|                 | Time (hours)     |        |        |        |
|                 | 8                | 24     | 48     | 96     |
| Macrophages     | 0.0052           | 0.0001 | 0.0151 | 0.0003 |
| Neutrophil      | 0.0086           | 0.0002 | 0.0063 | 0.0006 |
| Dendritic Cells | 0.0006           | 0.0155 | 0.1351 | 0.0008 |
| NK cells        | 0.0294           | 0.0179 | 0.0260 | 0.0001 |
| T-cells         | 0.0183           | 0.2309 | 0.0026 | 0.0731 |
| B-cells         | 0.5263           | 0.0755 | 0.1880 | 0.1401 |

SI Figure 30. Statistical analysis of differences in FR- $\beta$  positive (F3 positive) immune cells from the peritoneal fluid of mice after thioglycollate injection (from **Fig. 3B** and **SI Fig. 29**). Mice were injected IP with thioglycollate (1 mL of a 3% solution) and sacrificed at various times after the injection. IP fluid was removed, stained with various antibodies against both cell-type markers and mouse FR- $\beta$  prior to analysis by flow cytometry. The percentage of each cell type that was FR- $\beta$  positive is plotted versus time post-thioglycollate injection. A p-value < 0.05 was considered significant and highlighted in yellow.

|                 | t-test (p-value) |
|-----------------|------------------|
| Macrophages     | 0.0001           |
| Neutrophil      | 0.0002           |
| Dendritic Cells | 0.9201           |
| NK cells        | 0.0632           |
| T-cells         | 0.4151           |
| B-cells         | 0.0912           |

SI Figure 31. Statistical analysis of differences in immune cell numbers from the peritoneal fluid of mice treated with or without therapy from F3 monoclonal antibody after thioglycollate injection (from **Fig. 3C**). Mice were injected IP with thioglycollate (1 mL of a 3% solution) and 48h later injected with 5mg/kg of F3 monoclonal antibody. After an additional 48h, mice were sacrificed, and IP fluid was removed, stained with various antibodies against cell-type markers and analyzed by flow cytometry. A t-test was used to determine if there were any significant differences in the number of different immune cell types between the F3 treated and non-treated animals. A p-value < 0.05 was considered significant and highlighted in yellow.

## All Macrophages

## M1-Macrophages Only

## M2-Macrophages Only

Statistical Difference Between Healthy vs. F3 Treatments

| p-value | Healthy | F3 (mg/kg) |        |        |        |        |
|---------|---------|------------|--------|--------|--------|--------|
|         | 0       | 0          | 2.5    | 5      | 12.5   | 25     |
|         | -       | 0.0048     | 0.0012 | 0.0271 | 0.0019 | 0.0001 |

Statistical Difference Between Healthy vs. F3 Treatments

| p-value | Healthy | F3 (mg/kg) |        |        |        |        |
|---------|---------|------------|--------|--------|--------|--------|
|         | 0       | 0          | 2.5    | 5      | 12.5   | 25     |
|         | -       | 0.0193     | 0.0054 | 0.0139 | 0.0510 | 0.0097 |

Statistical Difference Between Healthy vs. F3 Treatments

| p-value | Healthy | F3 (mg/kg) |        |        |        |        |
|---------|---------|------------|--------|--------|--------|--------|
|         | 0       | 0          | 2.5    | 5      | 12.5   | 25     |
|         | -       | 0.0022     | 0.0002 | 0.0216 | 0.0109 | 0.0004 |

Statistical Difference Between F3 Treatments

|         | 1-Way Anova |    |       |        |        |
|---------|-------------|----|-------|--------|--------|
|         | SS          | df | MS    | F      | p      |
| Between | 104.3       | 4  | 26.07 | 5.7797 | 0.0020 |
| Within  | 112.8       | 25 | 4.51  |        |        |
| Total   | 217.0       | 29 |       |        |        |

Statistical Difference Between F3 Treatments

|         | 1-Way Anova |    |       |        |        |
|---------|-------------|----|-------|--------|--------|
|         | SS          | df | MS    | F      | p      |
| Between | 41.0        | 4  | 10.25 | 4.3569 | 0.0082 |
| Within  | 58.8        | 25 | 2.35  |        |        |
| Total   | 99.8        | 29 |       |        |        |

Statistical Difference Between F3 Treatments

|         | 1-Way Anova |    |      |        |        |
|---------|-------------|----|------|--------|--------|
|         | SS          | df | MS   | F      | p      |
| Between | 17.7        | 4  | 4.43 | 4.9468 | 0.0045 |
| Within  | 22.4        | 25 | 0.89 |        |        |
| Total   | 40.1        | 29 |      |        |        |

Tukey Test (p-value)  
Thioglycollate treated

| F3 (mg/kg) | F3 (mg/kg) |        |        |        |        |
|------------|------------|--------|--------|--------|--------|
|            | 0          | 2.5    | 5      | 12.5   | 25     |
| 0          | -          | 0.2350 | 0.0157 | 0.0028 | 0.0062 |
| 2.5        |            | -      | 0.6699 | 0.2892 | 0.4586 |
| 5          |            |        | -      | 0.9000 | 0.9000 |
| 12.5       |            |        |        | -      | 0.9000 |
| 25         |            |        |        |        | -      |

Tukey Test (p-value)  
Thioglycollate treated

| F3 (mg/kg) | F3 (mg/kg) |        |        |        |        |
|------------|------------|--------|--------|--------|--------|
|            | 0          | 2.5    | 5      | 12.5   | 25     |
| 0          | -          | 0.2527 | 0.0165 | 0.0294 | 0.0138 |
| 2.5        |            | -      | 0.6573 | 0.7932 | 0.6153 |
| 5          |            |        | -      | 0.9000 | 0.9000 |
| 12.5       |            |        |        | -      | 0.9000 |
| 25         |            |        |        |        | -      |

Tukey Test (p-value)  
Thioglycollate treated

| F3 (mg/kg) | F3 (mg/kg) |        |        |        |        |
|------------|------------|--------|--------|--------|--------|
|            | 0          | 2.5    | 5      | 12.5   | 25     |
| 0          | -          | 0.4974 | 0.0211 | 0.0024 | 0.0488 |
| 2.5        |            | -      | 0.8938 | 0.0715 | 0.4277 |
| 5          |            |        | -      | 0.2986 | 0.9000 |
| 12.5       |            |        |        | -      | 0.6985 |
| 25         |            |        |        |        | -      |

SI Figure 32. Statistical analysis of differences in macrophage numbers in peritoneal fluid of mice treated with and without F3 after thioglycollate injection (from **Fig. 3D**). Mice were injected IP with thioglycollate (1 mL of a 3% solution) and 48h later injected with various concentrations of F3 monoclonal antibody. After an additional 48h, mice were sacrificed, and IP fluid was removed, stained with various antibodies against macrophage-specific markers and analyzed by flow cytometry. A t-test was used to determine if there were any significant differences in the number of macrophages between healthy and Thioglycollate/F3 treated animals. A 1-way ANOVA was then performed to determine any differences between F3 treated groups. A p-value < 0.05 was considered significant and highlighted in yellow.

# **Collagen/Tuberculosis Bacteria RA Model**

## **F3 Biodistribution**



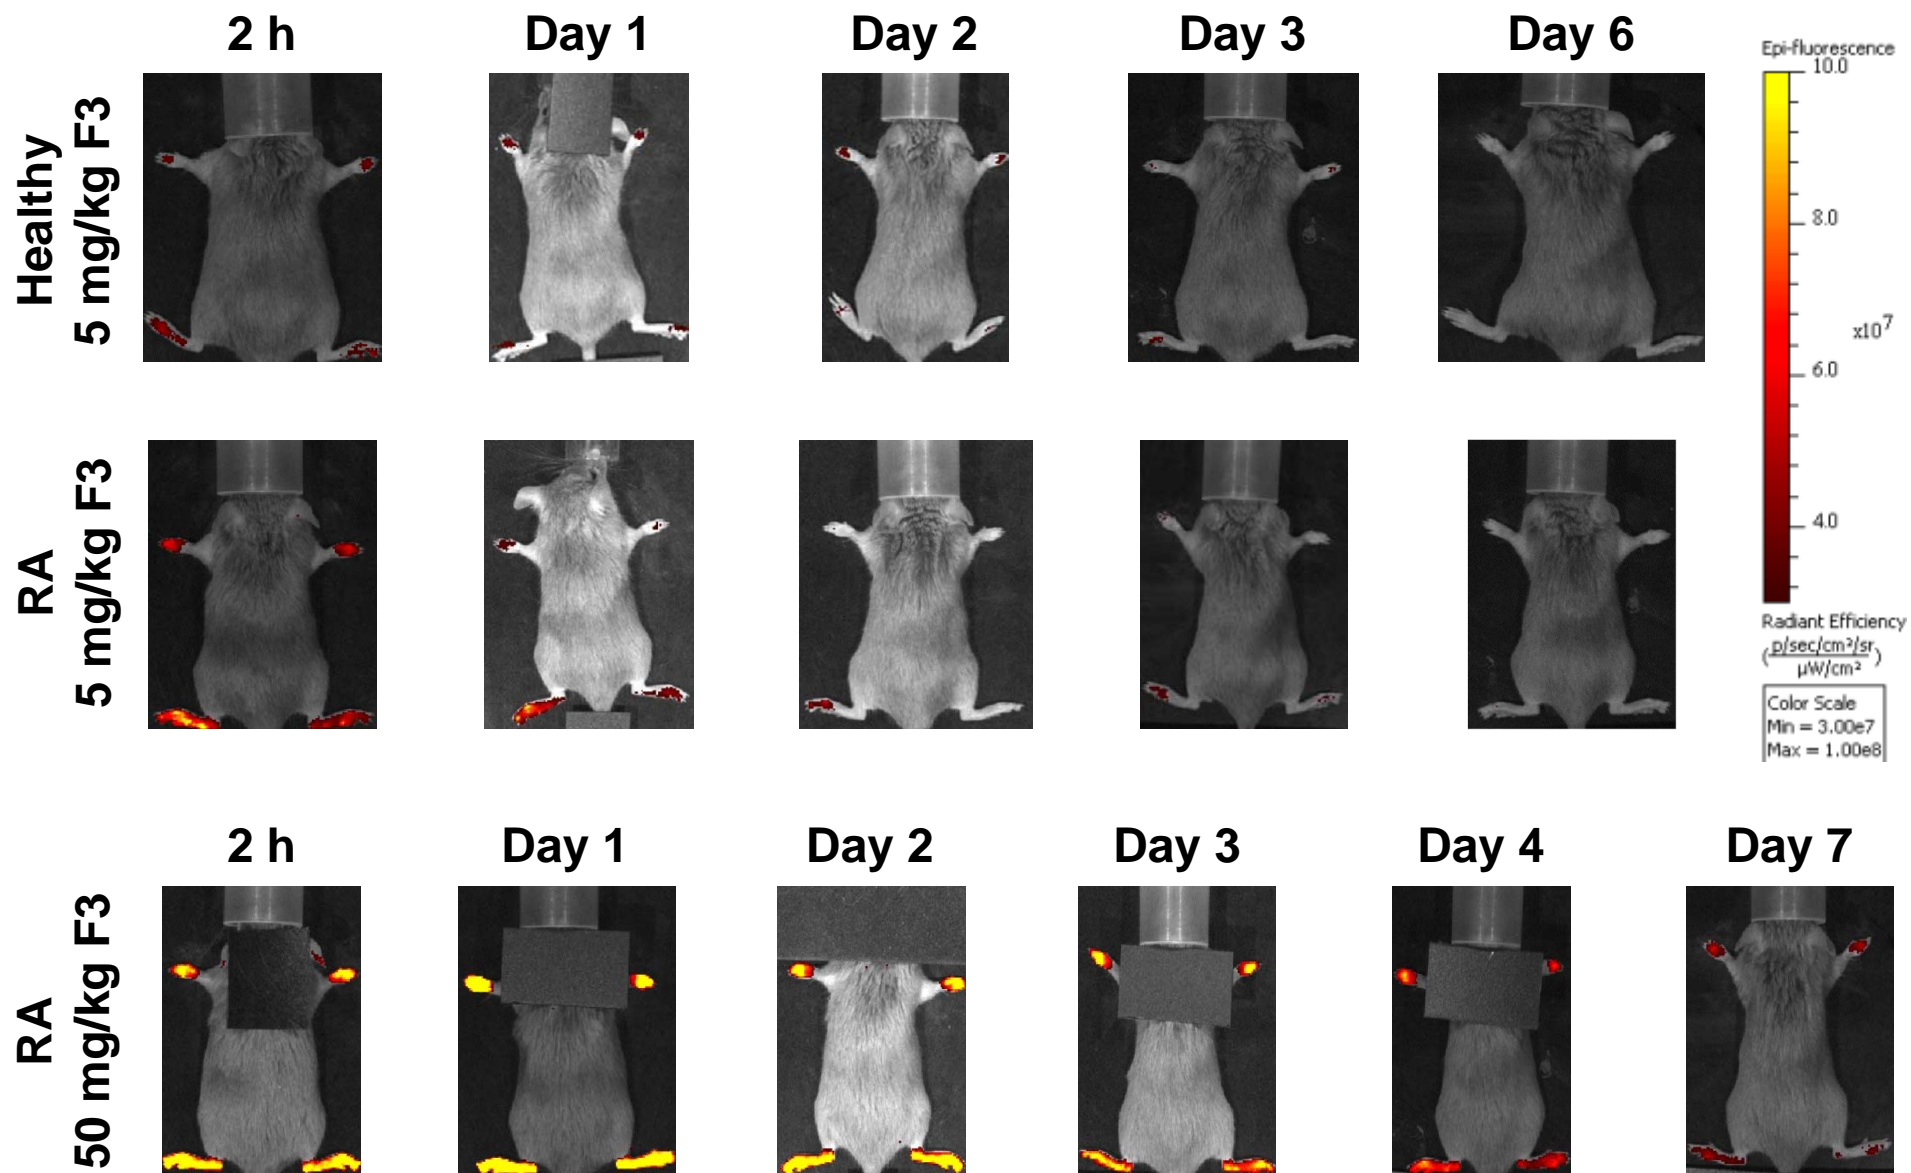

SI Figure 33. Time dependence of F3 uptake in arthritic mice treated to develop adjuvant-induced arthritis (from **Fig. 4B**). Adjuvant-induced arthritis was induced as described in Methods. Mice were injected intraperitoneally with AF647-conjugated F3 (5 or 50 mg/kg) when the arthritis score reached ~2. Whole animal fluorescence then was imaged at various times post-F3 injection.

# **Collagen/Tuberculosis Bacteria RA Model**

**Prophylactic Treatment**

**Arthritis Score and Weight**

Healthy (Vehicle Control) - Arthritis Score

|                    | Days  |       |       |       |       |       |       |       |       |       |       |       |       |       |       |       |       |       |       |
|--------------------|-------|-------|-------|-------|-------|-------|-------|-------|-------|-------|-------|-------|-------|-------|-------|-------|-------|-------|-------|
|                    | 0     | 1     | 2     | 3     | 4     | 5     | 6     | 7     | 8     | 9     | 10    | 11    | 12    | 13    | 14    | 15    | 16    | 17    | 18    |
| n                  | 4     | 4     | 4     | 4     | 4     | 4     | 4     | 4     | 4     | 4     | 4     | 4     | 4     | 4     | 4     | 4     | 4     | 4     | 4     |
| average            | 0.00  | 0.00  | 0.00  | 0.00  | 0.00  | 0.00  | 0.00  | 0.00  | 0.00  | 0.00  | 0.00  | 0.00  | 0.00  | 0.00  | 0.00  | 0.00  | 0.00  | 0.00  | 0.00  |
| standard deviation | 0.000 | 0.000 | 0.000 | 0.000 | 0.000 | 0.000 | 0.000 | 0.000 | 0.000 | 0.000 | 0.000 | 0.000 | 0.000 | 0.000 | 0.000 | 0.000 | 0.000 | 0.000 | 0.000 |
| standard error     | 0.000 | 0.000 | 0.000 | 0.000 | 0.000 | 0.000 | 0.000 | 0.000 | 0.000 | 0.000 | 0.000 | 0.000 | 0.000 | 0.000 | 0.000 | 0.000 | 0.000 | 0.000 | 0.000 |

RA (Vehicle Control) - Arthritis Score

|                    | Days  |       |       |       |       |       |       |       |       |       |       |       |       |       |       |       |       |       |       |
|--------------------|-------|-------|-------|-------|-------|-------|-------|-------|-------|-------|-------|-------|-------|-------|-------|-------|-------|-------|-------|
|                    | 0     | 1     | 2     | 3     | 4     | 5     | 6     | 7     | 8     | 9     | 10    | 11    | 12    | 13    | 14    | 15    | 16    | 17    | 18    |
| n                  | 12    | 12    | 12    | 12    | 12    | 12    | 12    | 12    | 12    | 12    | 12    | 12    | 12    | 12    | 12    | 12    | 12    | 12    | 12    |
| average            | 0.00  | 0.00  | 0.00  | 0.00  | 0.00  | 0.00  | 0.00  | 0.25  | 1.10  | 1.88  | 2.65  | 3.10  | 3.31  | 3.40  | 3.48  | 3.50  | 3.54  | 3.56  | 3.58  |
| standard deviation | 0.000 | 0.000 | 0.000 | 0.000 | 0.000 | 0.000 | 0.000 | 0.354 | 0.808 | 0.843 | 0.901 | 0.895 | 0.791 | 0.734 | 0.695 | 0.648 | 0.629 | 0.632 | 0.643 |
| standard error     | 0.000 | 0.000 | 0.000 | 0.000 | 0.000 | 0.000 | 0.000 | 0.102 | 0.233 | 0.243 | 0.260 | 0.258 | 0.228 | 0.212 | 0.201 | 0.187 | 0.182 | 0.182 | 0.185 |

5 mg/kg F3 - Arthritis Score

|                    | Days  |       |       |       |       |       |       |       |       |       |       |       |       |       |       |       |       |       |       |
|--------------------|-------|-------|-------|-------|-------|-------|-------|-------|-------|-------|-------|-------|-------|-------|-------|-------|-------|-------|-------|
|                    | 0     | 1     | 2     | 3     | 4     | 5     | 6     | 7     | 8     | 9     | 10    | 11    | 12    | 13    | 14    | 15    | 16    | 17    | 18    |
| n                  | 12    | 12    | 12    | 12    | 12    | 12    | 12    | 12    | 12    | 12    | 12    | 12    | 12    | 12    | 12    | 12    | 12    | 12    | 12    |
| average            | 0.00  | 0.00  | 0.00  | 0.00  | 0.00  | 0.00  | 0.00  | 0.08  | 0.29  | 0.71  | 1.23  | 1.77  | 2.06  | 2.29  | 2.48  | 2.50  | 2.54  | 2.54  | 2.54  |
| standard deviation | 0.000 | 0.000 | 0.000 | 0.000 | 0.000 | 0.000 | 0.000 | 0.195 | 0.382 | 0.940 | 1.194 | 1.371 | 1.466 | 1.414 | 1.359 | 1.331 | 1.356 | 1.356 | 1.356 |
| standard error     | 0.000 | 0.000 | 0.000 | 0.000 | 0.000 | 0.000 | 0.000 | 0.056 | 0.110 | 0.271 | 0.345 | 0.396 | 0.423 | 0.408 | 0.392 | 0.384 | 0.391 | 0.391 | 0.391 |

10 mg/kg F3 - Arthritis Score

|                    | Days  |       |       |       |       |       |       |       |       |       |       |       |       |       |       |       |       |       |       |
|--------------------|-------|-------|-------|-------|-------|-------|-------|-------|-------|-------|-------|-------|-------|-------|-------|-------|-------|-------|-------|
|                    | 0     | 1     | 2     | 3     | 4     | 5     | 6     | 7     | 8     | 9     | 10    | 11    | 12    | 13    | 14    | 15    | 16    | 17    | 18    |
| n                  | 12    | 12    | 12    | 12    | 12    | 12    | 12    | 12    | 12    | 12    | 12    | 12    | 12    | 12    | 12    | 12    | 12    | 12    | 12    |
| average            | 0.00  | 0.00  | 0.00  | 0.00  | 0.00  | 0.00  | 0.00  | 0.00  | 0.00  | 0.17  | 0.65  | 1.04  | 1.27  | 1.52  | 1.69  | 1.75  | 1.77  | 1.79  | 1.79  |
| standard deviation | 0.000 | 0.000 | 0.000 | 0.000 | 0.000 | 0.000 | 0.000 | 0.000 | 0.000 | 0.268 | 0.607 | 0.797 | 0.968 | 0.956 | 1.034 | 1.071 | 1.095 | 1.091 | 1.091 |
| standard error     | 0.000 | 0.000 | 0.000 | 0.000 | 0.000 | 0.000 | 0.000 | 0.000 | 0.000 | 0.077 | 0.175 | 0.230 | 0.279 | 0.276 | 0.299 | 0.309 | 0.316 | 0.315 | 0.315 |

10 mg/kg Enbrel - Arthritis Score

|                    | Days  |       |       |       |       |       |       |       |       |       |       |       |       |       |       |       |       |       |       |
|--------------------|-------|-------|-------|-------|-------|-------|-------|-------|-------|-------|-------|-------|-------|-------|-------|-------|-------|-------|-------|
|                    | 0     | 1     | 2     | 3     | 4     | 5     | 6     | 7     | 8     | 9     | 10    | 11    | 12    | 13    | 14    | 15    | 16    | 17    | 18    |
| n                  | 12    | 12    | 12    | 12    | 12    | 12    | 12    | 12    | 12    | 12    | 12    | 12    | 12    | 12    | 12    | 12    | 12    | 12    | 12    |
| average            | 0.00  | 0.00  | 0.00  | 0.00  | 0.00  | 0.00  | 0.00  | 0.00  | 0.33  | 0.65  | 1.10  | 1.48  | 1.60  | 1.75  | 1.96  | 1.98  | 2.00  | 2.00  | 2.00  |
| standard deviation | 0.000 | 0.000 | 0.000 | 0.000 | 0.000 | 0.000 | 0.000 | 0.000 | 0.615 | 0.787 | 0.862 | 0.997 | 0.985 | 1.061 | 1.027 | 1.019 | 1.061 | 1.061 | 1.061 |
| standard error     | 0.000 | 0.000 | 0.000 | 0.000 | 0.000 | 0.000 | 0.000 | 0.000 | 0.178 | 0.227 | 0.249 | 0.288 | 0.284 | 0.306 | 0.296 | 0.294 | 0.306 | 0.306 | 0.306 |

SI Figure 34. Comparison of Arthritis Scores following F3 or etanercept treatment of arthritic mice (from **Fig. 5A**). Arthritis was induced as described in methods and either F3 (5 or 10 mg/kg) or etanercept (10 mg/kg) was injected intraperitoneally 18 days later (day 0) before signs of arthritis were evident. Table provides arthritis scores as a function of time.

### 1-way ANOVA

|                                      | Day    |       |     |          |       |      |          |       |      |          |       |      |          |       |      |          |       |      |
|--------------------------------------|--------|-------|-----|----------|-------|------|----------|-------|------|----------|-------|------|----------|-------|------|----------|-------|------|
|                                      | 7      |       |     | 8        |       |      | 9        |       |      | 10       |       |      | 11       |       |      | 12       |       |      |
| SS (Between   Within   Total)        | 0.5    | 1.8   | 2.3 | 8.7      | 13.0  | 21.7 | 21.6     | 25.1  | 46.8 | 34.2     | 36.9  | 71.0 | 41.1     | 47.4  | 88.5 | 44.5     | 51.5  | 96.0 |
| df (Between   Within   Total)        | 4      | 47    | 51  | 4        | 47    | 51   | 4        | 47    | 51   | 4        | 47    | 51   | 4        | 47    | 51   | 4        | 47    | 51   |
| MS (Between   Within)                | 0.131  | 0.038 |     | 2.176    | 0.276 |      | 5.403    | 0.535 |      | 8.538    | 0.784 |      | 10.266   | 1.009 |      | 11.125   | 1.096 |      |
| F                                    | 3.447  |       |     | 7.896    |       |      | 10.101   |       |      | 10.888   |       |      | 10.179   |       |      | 10.148   |       |      |
| p-value                              | 0.0150 |       |     | 5.93E-05 |       |      | 5.53E-06 |       |      | 2.50E-06 |       |      | 5.10E-06 |       |      | 5.26E-06 |       |      |
| <b>post-hoc Tukey Test (p-value)</b> |        |       |     |          |       |      |          |       |      |          |       |      |          |       |      |          |       |      |
| Healthy vs. Disease                  | 0.1910 |       |     | 0.0058   |       |      | 0.0010   |       |      | 0.0010   |       |      | 0.0010   |       |      | 0.0010   |       |      |
| Healthy vs. F3 (5 mg/kg)             | 0.9000 |       |     | 0.8579   |       |      | 0.4598   |       |      | 0.1319   |       |      | 0.0291   |       |      | 0.0111   |       |      |
| Healthy vs. F3 (10 mg/kg)            | 0.9000 |       |     | 0.9000   |       |      | 0.9000   |       |      | 0.6909   |       |      | 0.3889   |       |      | 0.2363   |       |      |
| Healthy vs. Enbrel (10 mg/kg)        | 0.9000 |       |     | 0.7816   |       |      | 0.5432   |       |      | 0.2130   |       |      | 0.0966   |       |      | 0.0770   |       |      |
| Disease vs. F3 (5 mg/kg)             | 0.2410 |       |     | 0.0037   |       |      | 0.0026   |       |      | 0.0025   |       |      | 0.0173   |       |      | 0.0404   |       |      |
| Disease vs. F3 (10 mg/kg)            | 0.0235 |       |     | 0.0010   |       |      | 0.0010   |       |      | 0.0010   |       |      | 0.0010   |       |      | 0.0010   |       |      |
| Disease vs. Enbrel (10 mg/kg)        | 0.0235 |       |     | 0.0066   |       |      | 0.0014   |       |      | 0.0010   |       |      | 0.0022   |       |      | 0.0020   |       |      |
| F3 (5 mg/kg) vs. F3 (10 mg/kg)       | 0.8117 |       |     | 0.6367   |       |      | 0.3789   |       |      | 0.4963   |       |      | 0.3993   |       |      | 0.3575   |       |      |
| F3 (5 mg/kg) vs. Enbrel (10 mg/kg)   | 0.8117 |       |     | 0.9000   |       |      | 0.9000   |       |      | 0.9000   |       |      | 0.9000   |       |      | 0.7969   |       |      |
| F3 (10 mg/kg) vs. Enbrel (10 mg/kg)  | 0.9000 |       |     | 0.5289   |       |      | 0.5014   |       |      | 0.6884   |       |      | 0.7997   |       |      | 0.9000   |       |      |

|                                      | Day      |       |      |          |       |      |          |       |      |          |       |      |          |       |      |          |       |      |
|--------------------------------------|----------|-------|------|----------|-------|------|----------|-------|------|----------|-------|------|----------|-------|------|----------|-------|------|
|                                      | 13       |       |      | 14       |       |      | 15       |       |      | 16       |       |      | 17       |       |      | 18       |       |      |
| SS (Between   Within   Total)        | 43.7     | 50.3  | 94.0 | 43.8     | 49.0  | 92.8 | 43.6     | 48.2  | 91.8 | 44.8     | 50.1  | 94.9 | 45.5     | 50.1  | 95.3 | 45.8     | 50.3  | 96.0 |
| df (Between   Within   Total)        | 4        | 47    | 51   | 4        | 47    | 51   | 4        | 47    | 51   | 4        | 47    | 51   | 4        | 47    | 51   | 4        | 47    | 51   |
| MS (Between   Within)                | 10.918   | 1.071 |      | 10.942   | 1.042 |      | 10.907   | 1.025 |      | 11.192   | 1.067 |      | 11.289   | 1.066 |      | 11.450   | 1.069 |      |
| F                                    | 10.193   |       |      | 10.499   |       |      | 10.640   |       |      | 10.491   |       |      | 10.590   |       |      | 10.709   |       |      |
| p-value                              | 5.03E-06 |       |      | 3.69E-06 |       |      | 3.20E-06 |       |      | 3.72E-06 |       |      | 3.36E-06 |       |      | 2.98E-06 |       |      |
| <b>post-hoc Tukey Test (p-value)</b> |          |       |      |          |       |      |          |       |      |          |       |      |          |       |      |          |       |      |
| Healthy vs. Disease                  | 0.0010   |       |      | 0.0010   |       |      | 0.0010   |       |      | 0.0010   |       |      | 0.0010   |       |      | 0.0010   |       |      |
| Healthy vs. F3 (5 mg/kg)             | 0.0033   |       |      | 0.0011   |       |      | 0.0010   |       |      | 0.0010   |       |      | 0.0010   |       |      | 0.0010   |       |      |
| Healthy vs. F3 (10 mg/kg)            | 0.0979   |       |      | 0.0469   |       |      | 0.0339   |       |      | 0.0361   |       |      | 0.0329   |       |      | 0.0333   |       |      |
| Healthy vs. Enbrel (10 mg/kg)        | 0.0399   |       |      | 0.0143   |       |      | 0.0120   |       |      | 0.0131   |       |      | 0.0130   |       |      | 0.0132   |       |      |
| Disease vs. F3 (5 mg/kg)             | 0.0843   |       |      | 0.1332   |       |      | 0.1278   |       |      | 0.1411   |       |      | 0.1271   |       |      | 0.1159   |       |      |
| Disease vs. F3 (10 mg/kg)            | 0.0010   |       |      | 0.0010   |       |      | 0.0010   |       |      | 0.0011   |       |      | 0.0011   |       |      | 0.0010   |       |      |
| Disease vs. Enbrel (10 mg/kg)        | 0.0027   |       |      | 0.0057   |       |      | 0.0052   |       |      | 0.0056   |       |      | 0.0048   |       |      | 0.0042   |       |      |
| F3 (5 mg/kg) vs. F3 (10 mg/kg)       | 0.3731   |       |      | 0.3318   |       |      | 0.3787   |       |      | 0.3710   |       |      | 0.3988   |       |      | 0.4004   |       |      |
| F3 (5 mg/kg) vs. Enbrel (10 mg/kg)   | 0.6805   |       |      | 0.6984   |       |      | 0.6927   |       |      | 0.6791   |       |      | 0.6488   |       |      | 0.6798   |       |      |
| F3 (10 mg/kg) vs. Enbrel (10 mg/kg)  | 0.9000   |       |      | 0.9000   |       |      | 0.9000   |       |      | 0.9000   |       |      | 0.9000   |       |      | 0.9000   |       |      |

SI Figure 35. Statistical analysis of differences in Arthritis Scores following F3 or etanercept treatment of arthritic mice (from Fig. 5A). Arthritis was induced as described in methods and either F3 (5 or 10 mg/kg) or etanercept (10 mg/kg) was injected intraperitoneally 18 days later (day 0) before signs of arthritis were evident. A 1-way ANOVA followed by a post-hoc Tukey test was used to determine if there were any significant differences in Arthritis Scores between groups. A p-value < 0.05 was considered significant and highlighted in yellow.

| Healthy (Vehicle Control) - Body Weight (g) |       |       |       |       |       |       |       |       |       |       |
|---------------------------------------------|-------|-------|-------|-------|-------|-------|-------|-------|-------|-------|
|                                             | Days  |       |       |       |       |       |       |       |       |       |
|                                             | 0     | 2     | 4     | 6     | 8     | 10    | 12    | 14    | 16    | 18    |
| n                                           | 4     | 4     | 4     | 4     | 4     | 4     | 4     | 4     | 4     | 4     |
| average                                     | 24.61 | 24.68 | 24.83 | 24.98 | 24.18 | 24.72 | 24.56 | 25.29 | 25.33 | 25.61 |
| standard deviation                          | 0.843 | 0.918 | 1.118 | 0.907 | 1.385 | 1.290 | 1.533 | 1.240 | 1.207 | 1.392 |
| standard error                              | 0.421 | 0.459 | 0.559 | 0.453 | 0.693 | 0.645 | 0.766 | 0.620 | 0.604 | 0.696 |

  

| RA (Vehicle Control) - Body Weight (g) |       |       |       |       |       |       |       |       |       |       |
|----------------------------------------|-------|-------|-------|-------|-------|-------|-------|-------|-------|-------|
|                                        | Days  |       |       |       |       |       |       |       |       |       |
|                                        | 0     | 2     | 4     | 6     | 8     | 10    | 12    | 14    | 16    | 18    |
| n                                      | 12    | 12    | 12    | 12    | 12    | 12    | 12    | 12    | 12    | 12    |
| average                                | 21.85 | 21.71 | 22.03 | 22.00 | 20.44 | 19.73 | 19.25 | 19.41 | 19.26 | 20.32 |
| standard deviation                     | 1.623 | 1.544 | 1.684 | 1.699 | 1.773 | 1.775 | 1.688 | 1.471 | 1.449 | 1.366 |
| standard error                         | 0.469 | 0.446 | 0.486 | 0.491 | 0.512 | 0.512 | 0.487 | 0.425 | 0.418 | 0.394 |

  

| 5 mg/kg F3 - Body Weight (g) |       |       |       |       |       |       |       |       |       |       |
|------------------------------|-------|-------|-------|-------|-------|-------|-------|-------|-------|-------|
|                              | Days  |       |       |       |       |       |       |       |       |       |
|                              | 0     | 2     | 4     | 6     | 8     | 10    | 12    | 14    | 16    | 18    |
| n                            | 12    | 12    | 12    | 12    | 12    | 12    | 12    | 12    | 12    | 12    |
| average                      | 21.88 | 21.92 | 22.42 | 22.54 | 20.81 | 20.67 | 20.21 | 20.22 | 20.08 | 21.10 |
| standard deviation           | 1.480 | 1.398 | 1.721 | 1.605 | 1.460 | 1.446 | 1.364 | 1.684 | 1.758 | 1.581 |
| standard error               | 0.427 | 0.404 | 0.497 | 0.463 | 0.421 | 0.417 | 0.394 | 0.486 | 0.507 | 0.457 |

  

| 10 mg/kg F3 - Body Weight (g) |       |       |       |       |       |       |       |       |       |       |
|-------------------------------|-------|-------|-------|-------|-------|-------|-------|-------|-------|-------|
|                               | Days  |       |       |       |       |       |       |       |       |       |
|                               | 0     | 2     | 4     | 6     | 8     | 10    | 12    | 14    | 16    | 18    |
| n                             | 12    | 12    | 12    | 12    | 12    | 12    | 12    | 12    | 12    | 12    |
| average                       | 21.85 | 21.98 | 22.36 | 22.32 | 21.06 | 21.15 | 20.63 | 20.68 | 20.49 | 21.42 |
| standard deviation            | 1.212 | 1.177 | 1.133 | 1.113 | 1.150 | 1.295 | 1.346 | 1.468 | 1.404 | 1.265 |
| standard error                | 0.350 | 0.340 | 0.327 | 0.321 | 0.332 | 0.374 | 0.389 | 0.424 | 0.405 | 0.365 |

  

| 10 mg/kg Enbrel - Body Weight (g) |       |       |       |       |       |       |       |       |       |       |
|-----------------------------------|-------|-------|-------|-------|-------|-------|-------|-------|-------|-------|
|                                   | Days  |       |       |       |       |       |       |       |       |       |
|                                   | 0     | 2     | 4     | 6     | 8     | 10    | 12    | 14    | 16    | 18    |
| n                                 | 12    | 12    | 12    | 12    | 12    | 12    | 12    | 12    | 12    | 12    |
| average                           | 22.02 | 22.30 | 22.72 | 22.69 | 21.72 | 21.75 | 21.29 | 21.49 | 21.06 | 21.97 |
| standard deviation                | 1.404 | 1.423 | 1.501 | 1.428 | 1.506 | 1.957 | 2.140 | 2.051 | 1.986 | 1.899 |
| standard error                    | 0.405 | 0.411 | 0.433 | 0.412 | 0.435 | 0.565 | 0.618 | 0.592 | 0.573 | 0.548 |

SI Figure 36. Comparison of body weight following F3 or etanercept treatment of arthritic mice (from **Fig. 5A**). Arthritis was induced as described in methods and either F3 (5 or 10 mg/kg) or etanercept (10 mg/kg) was injected intraperitoneally 18 days later (day 0) before signs of arthritis were evident. Table provides body weights as a function of time.

### 1-way ANOVA

|                                      | Day    |       |       |        |       |       |        |       |       |        |       |       |        |       |       |        |       |       |          |       |       |          |       |       |          |       |       |          |       |       |        |  |  |
|--------------------------------------|--------|-------|-------|--------|-------|-------|--------|-------|-------|--------|-------|-------|--------|-------|-------|--------|-------|-------|----------|-------|-------|----------|-------|-------|----------|-------|-------|----------|-------|-------|--------|--|--|
|                                      | 0      |       |       | 2      |       |       | 4      |       |       | 6      |       |       | 8      |       |       | 10     |       |       | 12       |       |       | 14       |       |       | 16       |       |       | 18       |       |       |        |  |  |
| SS (Between   Within   Total)        | 27.3   | 93.1  | 120.4 | 29.2   | 87.8  | 116.9 | 25.0   | 106.4 | 131.4 | 28.1   | 98.6  | 126.7 | 47.7   | 103.3 | 150.9 | 82.2   | 123.2 | 205.4 | 92.1     | 129.2 | 221.2 | 113.8    | 129.6 | 243.4 | 116.9    | 126.5 | 243.4 | 88.8     | 111.1 | 199.9 |        |  |  |
| df (Between   Within   Total)        | 4      | 47    | 51    | 4      | 47    | 51    | 4      | 47    | 51    | 4      | 47    | 51    | 4      | 47    | 51    | 4      | 47    | 51    | 4        | 47    | 51    | 4        | 47    | 51    | 4        | 47    | 51    | 4        | 47    | 51    |        |  |  |
| MS (Between   Within)                | 6.828  | 1.980 |       | 7.293  | 1.868 |       | 6.240  | 2.264 |       | 7.031  | 2.098 |       | 11.918 | 2.197 |       | 20.545 | 2.621 |       | 23.019   | 2.748 |       | 28.451   | 2.753 |       | 29.230   | 2.692 |       | 22.210   | 2.364 |       |        |  |  |
| F                                    | 3.448  |       |       | 3.905  |       |       | 2.756  |       |       | 3.351  |       |       | 5.424  |       |       | 7.838  |       |       | 8.377    |       |       | 10.319   |       |       | 10.858   |       |       | 9.397    |       |       |        |  |  |
| p-value                              | 0.0150 |       |       | 0.0081 |       |       | 0.0386 |       |       | 0.0171 |       |       | 0.0011 |       |       | 0.0001 |       |       | 3.47E-05 |       |       | 4.43E-06 |       |       | 2.57E-06 |       |       | 1.15E-05 |       |       |        |  |  |
| <b>post-hoc Tukey Test (p-value)</b> |        |       |       |        |       |       |        |       |       |        |       |       |        |       |       |        |       |       |          |       |       |          |       |       |          |       |       |          |       |       |        |  |  |
| Healthy vs. Disease                  | 0.0118 |       |       | 0.0040 |       |       | 0.0190 |       |       | 0.0071 |       |       | 0.0010 |       |       | 0.0010 |       |       | 0.0010   |       |       | 0.0010   |       |       | 0.0010   |       |       | 0.0010   |       |       | 0.0010 |  |  |
| Healthy vs. F3 (5 mg/kg)             | 0.0129 |       |       | 0.0086 |       |       | 0.0584 |       |       | 0.0406 |       |       | 0.0024 |       |       | 0.0010 |       |       | 0.0110   |       |       | 0.0010   |       |       | 0.0010   |       |       | 0.0010   |       |       | 0.0010 |  |  |
| Healthy vs. F3 (10 mg/kg)            | 0.0116 |       |       | 0.0109 |       |       | 0.0489 |       |       | 0.0210 |       |       | 0.0057 |       |       | 0.0034 |       |       | 0.0014   |       |       | 0.0010   |       |       | 0.0010   |       |       | 0.0010   |       |       | 0.0010 |  |  |
| Healthy vs. Enbrel (10 mg/kg)        | 0.0207 |       |       | 0.0314 |       |       | 0.1268 |       |       | 0.0622 |       |       | 0.0458 |       |       | 0.0211 |       |       | 0.0010   |       |       | 0.0022   |       |       | 0.0010   |       |       | 0.0015   |       |       | 0.0015 |  |  |
| Disease vs. F3 (5 mg/kg)             | 0.9000 |       |       | 0.9000 |       |       | 0.9000 |       |       | 0.8820 |       |       | 0.9000 |       |       | 0.6069 |       |       | 0.0318   |       |       | 0.7234   |       |       | 0.7119   |       |       | 0.7008   |       |       | 0.7008 |  |  |
| Disease vs. F3 (10 mg/kg)            | 0.9000 |       |       | 0.9000 |       |       | 0.9000 |       |       | 0.9000 |       |       | 0.8188 |       |       | 0.2220 |       |       | 0.2627   |       |       | 0.3458   |       |       | 0.3670   |       |       | 0.4160   |       |       | 0.4160 |  |  |
| Disease vs. Enbrel (10 mg/kg)        | 0.9000 |       |       | 0.9000 |       |       | 0.7686 |       |       | 0.7436 |       |       | 0.2270 |       |       | 0.0291 |       |       | 0.6068   |       |       | 0.0280   |       |       | 0.7045   |       |       | 0.0809   |       |       | 0.0809 |  |  |
| F3 (5 mg/kg) vs. F3 (10 mg/kg)       | 0.9000 |       |       | 0.9000 |       |       | 0.9000 |       |       | 0.9000 |       |       | 0.9000 |       |       | 0.9000 |       |       | 0.8493   |       |       | 0.9000   |       |       | 0.9000   |       |       | 0.9000   |       |       | 0.9000 |  |  |
| F3 (5 mg/kg) vs. Enbrel (10 mg/kg)   | 0.9000 |       |       | 0.9000 |       |       | 0.9000 |       |       | 0.9000 |       |       | 0.5597 |       |       | 0.4814 |       |       | 0.5016   |       |       | 0.3512   |       |       | 0.5780   |       |       | 0.6227   |       |       | 0.6227 |  |  |
| F3 (10 mg/kg) vs. Enbrel (10 mg/kg)  | 0.9000 |       |       | 0.9000 |       |       | 0.9000 |       |       | 0.9000 |       |       | 0.7859 |       |       | 0.8832 |       |       | 0.9000   |       |       | 0.7289   |       |       | 0.9000   |       |       | 0.9000   |       |       | 0.9000 |  |  |

SI Figure 37. Statistical analysis of differences in body weight following F3 or etanercept treatment of arthritic mice (from **Fig. 5A**). Arthritis was induced as described in methods and either F3 (5 or 10 mg/kg) or etanercept (10 mg/kg) was injected intraperitoneally 18 days later (day 0) before signs of arthritis were evident. A 1-way ANOVA followed by a post-hoc Tukey test was used to determine if there were any significant differences in body weight between groups. A p-value < 0.05 was considered significant and highlighted in yellow.

**Collagen/Tuberculosis Bacteria RA Model**

**Restorative Treatment – Dose Finding/Pilot Study**

**Paw Thickness and Weight**

Healthy (Vehicle Control) - Paw Thickness (mm)

|                    | Days |      |      |      |      |      |      |      |      |      |      |      |      |      |      |      |      |
|--------------------|------|------|------|------|------|------|------|------|------|------|------|------|------|------|------|------|------|
|                    | 1    | 2    | 3    | 4    | 5    | 6    | 7    | 8    | 9    | 10   | 11   | 12   | 13   | 14   | 15   | 16   | 17   |
| n                  | 1    | 1    | 1    | 1    | 1    | 1    | 1    | 1    | 1    | 1    | 1    | 1    | 1    | 1    | 1    | 1    | 1    |
| average            | 1.18 | 1.17 | 1.16 | 1.16 | 1.11 | 1.17 | 1.14 | 1.10 | 1.14 | 1.07 | 1.11 | 1.12 | 1.19 | 1.20 | 1.19 | 1.19 | 1.20 |
| standard deviation | -    | -    | -    | -    | -    | -    | -    | -    | -    | -    | -    | -    | -    | -    | -    | -    | -    |
| standard error     | -    | -    | -    | -    | -    | -    | -    | -    | -    | -    | -    | -    | -    | -    | -    | -    | -    |

RA (Vehicle Control) - Paw Thickness (mm)

|                    | Days |      |      |      |      |      |      |      |      |      |      |      |      |      |      |      |      |
|--------------------|------|------|------|------|------|------|------|------|------|------|------|------|------|------|------|------|------|
|                    | 1    | 2    | 3    | 4    | 5    | 6    | 7    | 8    | 9    | 10   | 11   | 12   | 13   | 14   | 15   | 16   | 17   |
| n                  | 3    | 3    | 3    | 3    | 3    | 3    | 3    | 3    | 3    | 3    | 3    | 3    | 3    | 3    | 3    | 3    | 3    |
| average            | 1.45 | 1.55 | 1.60 | 1.54 | 1.68 | 1.63 | 1.71 | 1.79 | 1.85 | 1.87 | 1.85 | 1.86 | 1.94 | 1.99 | 1.95 | 1.95 | 1.93 |
| standard deviation | 0.08 | 0.26 | 0.18 | 0.30 | 0.28 | 0.26 | 0.19 | 0.23 | 0.34 | 0.14 | 0.15 | 0.10 | 0.05 | 0.10 | 0.05 | 0.18 | 0.18 |
| standard error     | 0.05 | 0.15 | 0.11 | 0.17 | 0.16 | 0.15 | 0.11 | 0.14 | 0.20 | 0.08 | 0.09 | 0.06 | 0.03 | 0.06 | 0.03 | 0.10 | 0.10 |

5 mg/kg F3

|                    | Days |      |      |      |      |      |      |      |      |      |      |      |      |      |      |      |      |
|--------------------|------|------|------|------|------|------|------|------|------|------|------|------|------|------|------|------|------|
|                    | 1    | 2    | 3    | 4    | 5    | 6    | 7    | 8    | 9    | 10   | 11   | 12   | 13   | 14   | 15   | 16   | 17   |
| n                  | 3    | 3    | 3    | 3    | 3    | 3    | 3    | 3    | 3    | 3    | 3    | 3    | 3    | 3    | 3    | 3    | 3    |
| average            | 1.6  | 1.4  | 1.5  | 1.5  | 1.6  | 1.5  | 1.5  | 1.6  | 1.6  | 1.6  | 1.6  | 1.6  | 1.6  | 1.6  | 1.7  | 1.8  | 1.7  |
| standard deviation | 0.18 | 0.24 | 0.24 | 0.23 | 0.29 | 0.20 | 0.31 | 0.36 | 0.20 | 0.40 | 0.22 | 0.25 | 0.04 | 0.17 | 0.23 | 0.13 | 0.19 |
| standard error     | 0.10 | 0.14 | 0.14 | 0.13 | 0.17 | 0.11 | 0.18 | 0.21 | 0.12 | 0.23 | 0.13 | 0.14 | 0.02 | 0.10 | 0.13 | 0.08 | 0.11 |

10 mg/kg F3

|                    | Days |      |      |      |      |      |      |      |      |      |      |      |      |      |      |      |      |
|--------------------|------|------|------|------|------|------|------|------|------|------|------|------|------|------|------|------|------|
|                    | 1    | 2    | 3    | 4    | 5    | 6    | 7    | 8    | 9    | 10   | 11   | 12   | 13   | 14   | 15   | 16   | 17   |
| n                  | 3    | 3    | 3    | 3    | 3    | 3    | 3    | 3    | 3    | 3    | 3    | 3    | 3    | 3    | 3    | 3    | 3    |
| average            | 1.41 | 1.40 | 1.41 | 1.39 | 1.42 | 1.30 | 1.30 | 1.35 | 1.42 | 1.33 | 1.41 | 1.39 | 1.33 | 1.44 | 1.41 | 1.38 | 1.44 |
| standard deviation | 0.13 | 0.24 | 0.11 | 0.07 | 0.14 | 0.10 | 0.11 | 0.12 | 0.12 | 0.15 | 0.06 | 0.20 | 0.08 | 0.22 | 0.21 | 0.20 | 0.14 |
| standard error     | 0.08 | 0.14 | 0.06 | 0.04 | 0.08 | 0.06 | 0.07 | 0.07 | 0.07 | 0.08 | 0.04 | 0.12 | 0.04 | 0.13 | 0.12 | 0.11 | 0.08 |

20 mg/kg F3

|                    | Days |      |      |      |      |      |      |      |      |      |      |      |      |      |      |      |      |
|--------------------|------|------|------|------|------|------|------|------|------|------|------|------|------|------|------|------|------|
|                    | 1    | 2    | 3    | 4    | 5    | 6    | 7    | 8    | 9    | 10   | 11   | 12   | 13   | 14   | 15   | 16   | 17   |
| n                  | 3    | 3    | 3    | 3    | 3    | 3    | 3    | 3    | 3    | 3    | 3    | 3    | 3    | 3    | 3    | 3    | 3    |
| average            | 1.42 | 1.40 | 1.34 | 1.22 | 1.26 | 1.26 | 1.34 | 1.28 | 1.21 | 1.14 | 1.19 | 1.25 | 1.20 | 1.22 | 1.23 | 1.19 | 1.18 |
| standard deviation | 0.03 | 0.01 | 0.01 | 0.04 | 0.01 | 0.09 | 0.03 | 0.07 | 0.10 | 0.03 | 0.05 | 0.00 | 0.06 | 0.06 | 0.02 | 0.01 | 0.06 |
| standard error     | 0.02 | 0.01 | 0.01 | 0.02 | 0.01 | 0.05 | 0.02 | 0.04 | 0.06 | 0.02 | 0.03 | 0.00 | 0.04 | 0.04 | 0.01 | 0.00 | 0.04 |

SI Figure 38. Comparison of paw thickness following F3 treatment in mice induced to develop arthritis (from **Fig. 5B**). Arthritis was induced as described in methods and F3 (5, 10 or 20 mg/kg) was injected intraperitoneally (day 1) only after arthritis scores reached ~2. Table provides paw thickness measurements as a function of time.





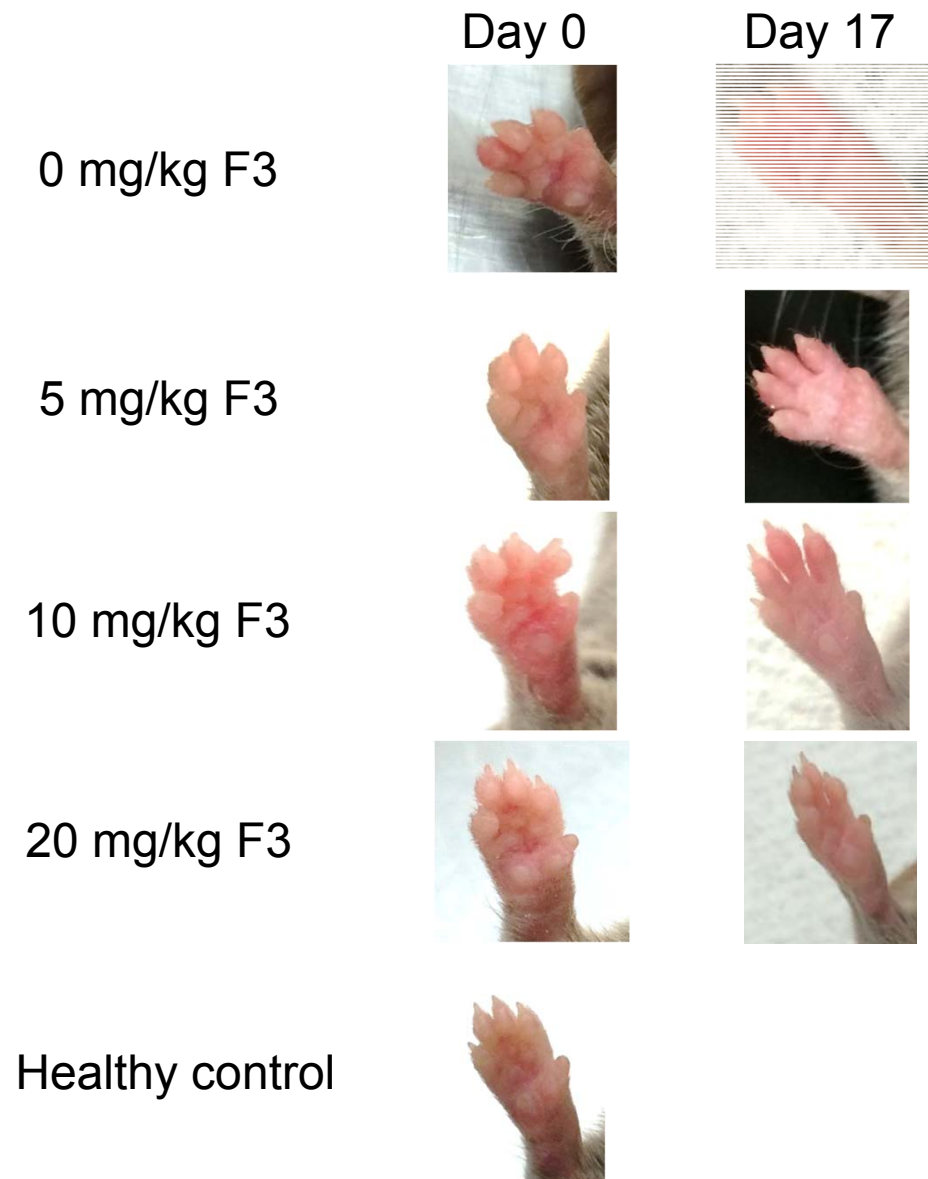

SI Figure 40. Images of paws from F3-treated and untreated mice induced to develop arthritis (from **Fig. 5B**). Arthritis was induced as described in methods and F3 (5, 10 or 20 mg/kg) was injected intraperitoneally (day 1) only after arthritis scores reached ~2. Images of paws were acquired on Day 0 and Day 17.

Healthy (Vehicle Control) - Body Weight (g)

|                    | Days |      |      |      |      |      |      |      |      |      |      |      |      |    |    |    |      |
|--------------------|------|------|------|------|------|------|------|------|------|------|------|------|------|----|----|----|------|
|                    | 1    | 2    | 3    | 4    | 5    | 6    | 7    | 8    | 9    | 10   | 11   | 12   | 13   | 14 | 15 | 16 | 17   |
| n                  | 1    | 1    | 1    | 1    | 1    | 1    | 1    | 1    | 1    | 1    | 1    | 1    | 1    | 1  | 1  | 1  | 1    |
| average            | 17   | 16.9 | 16.9 | 16.8 | 16.8 | 16.5 | 16.6 | 16.4 | 16.7 | 16.7 | 16.9 | 16.2 | 16.6 | 17 | 17 | 16 | 16.2 |
| standard deviation | -    | -    | -    | -    | -    | -    | -    | -    | -    | -    | -    | -    | -    | -  | -  | -  | -    |
| standard error     | -    | -    | -    | -    | -    | -    | -    | -    | -    | -    | -    | -    | -    | -  | -  | -  | -    |

RA (Vehicle Control) - Body Weight (g)

|                    | Days |      |      |      |      |      |      |      |      |      |      |      |      |      |      |      |      |
|--------------------|------|------|------|------|------|------|------|------|------|------|------|------|------|------|------|------|------|
|                    | 1    | 2    | 3    | 4    | 5    | 6    | 7    | 8    | 9    | 10   | 11   | 12   | 13   | 14   | 15   | 16   | 17   |
| n                  | 3    | 3    | 3    | 3    | 3    | 3    | 3    | 3    | 3    | 3    | 3    | 3    | 3    | 3    | 3    | 3    | 3    |
| average            | 18.8 | 18.5 | 18.5 | 18.5 | 18.2 | 17.9 | 17.7 | 17.6 | 17.6 | 17.1 | 17.1 | 17.0 | 16.8 | 17.1 | 16.9 | 17.1 | 17.3 |
| standard deviation | 0.83 | 0.85 | 0.64 | 0.40 | 0.21 | 0.59 | 0.30 | 0.21 | 0.72 | 0.20 | 0.72 | 0.69 | 0.57 | 0.55 | 0.76 | 0.81 | 0.82 |
| standard error     | 0.48 | 0.49 | 0.37 | 0.23 | 0.12 | 0.34 | 0.17 | 0.12 | 0.42 | 0.12 | 0.42 | 0.40 | 0.33 | 0.32 | 0.44 | 0.47 | 0.47 |

5 mg/kg F3

|                    | Days |      |      |      |      |      |      |      |      |      |      |      |      |      |      |      |      |
|--------------------|------|------|------|------|------|------|------|------|------|------|------|------|------|------|------|------|------|
|                    | 1    | 2    | 3    | 4    | 5    | 6    | 7    | 8    | 9    | 10   | 11   | 12   | 13   | 14   | 15   | 16   | 17   |
| n                  | 3    | 3    | 3    | 3    | 3    | 3    | 3    | 3    | 3    | 3    | 3    | 3    | 3    | 3    | 3    | 3    | 3    |
| average            | 18.8 | 18.4 | 18.0 | 18.0 | 18.2 | 18.4 | 18.5 | 18.3 | 18.6 | 18.4 | 17.8 | 17.8 | 17.8 | 18.0 | 17.8 | 17.7 | 17.8 |
| standard deviation | 1.17 | 1.58 | 1.59 | 1.55 | 1.62 | 1.61 | 1.42 | 1.82 | 2.01 | 1.35 | 1.50 | 1.85 | 2.14 | 2.27 | 2.57 | 2.42 | 2.32 |
| standard error     | 0.67 | 0.91 | 0.92 | 0.90 | 0.93 | 0.93 | 0.82 | 1.05 | 1.16 | 0.78 | 0.87 | 1.07 | 1.23 | 1.31 | 1.48 | 1.40 | 1.34 |

10 mg/kg F3

|                    | Days |      |      |      |      |      |      |      |      |      |      |      |      |      |      |      |      |
|--------------------|------|------|------|------|------|------|------|------|------|------|------|------|------|------|------|------|------|
|                    | 1    | 2    | 3    | 4    | 5    | 6    | 7    | 8    | 9    | 10   | 11   | 12   | 13   | 14   | 15   | 16   | 17   |
| n                  | 3    | 3    | 3    | 3    | 3    | 3    | 3    | 3    | 3    | 3    | 3    | 3    | 3    | 3    | 3    | 3    | 3    |
| average            | 18.6 | 18.3 | 18.1 | 18.1 | 17.9 | 17.9 | 17.8 | 17.8 | 18.1 | 17.8 | 17.6 | 17.5 | 17.9 | 17.7 | 17.7 | 17.5 | 17.5 |
| standard deviation | 0.85 | 0.99 | 0.96 | 1.04 | 0.98 | 1.22 | 1.06 | 1.21 | 1.93 | 1.36 | 1.21 | 1.37 | 1.37 | 1.60 | 1.26 | 1.12 | 1.02 |
| standard error     | 0.49 | 0.57 | 0.56 | 0.60 | 0.57 | 0.70 | 0.61 | 0.70 | 1.11 | 0.78 | 0.70 | 0.79 | 0.79 | 0.92 | 0.73 | 0.65 | 0.59 |

20 mg/kg F3

|                    | Days |      |      |      |      |      |      |      |      |      |      |      |      |      |      |      |      |
|--------------------|------|------|------|------|------|------|------|------|------|------|------|------|------|------|------|------|------|
|                    | 1    | 2    | 3    | 4    | 5    | 6    | 7    | 8    | 9    | 10   | 11   | 12   | 13   | 14   | 15   | 16   | 17   |
| n                  | 3    | 3    | 3    | 3    | 3    | 3    | 3    | 3    | 3    | 3    | 3    | 3    | 3    | 3    | 3    | 3    | 3    |
| average            | 18.2 | 17.8 | 17.8 | 17.6 | 17.7 | 17.5 | 17.1 | 16.8 | 17.1 | 16.8 | 16.9 | 16.5 | 16.2 | 16.2 | 16.2 | 16.2 | 16.0 |
| standard deviation | 0.07 | 0.92 | 1.13 | 0.49 | 1.13 | 1.06 | 0.71 | 0.35 | 0.28 | 1.06 | 0.49 | 0.49 | 0.35 | 0.07 | 0.07 | 0.07 | 0.07 |
| standard error     | 0.04 | 0.53 | 0.65 | 0.29 | 0.65 | 0.61 | 0.41 | 0.20 | 0.16 | 0.61 | 0.29 | 0.29 | 0.20 | 0.04 | 0.04 | 0.04 | 0.04 |

SI Figure 41. Comparison of body weight following F3 treatment in mice induced to develop arthritis (from **Fig. 5B**). Arthritis was induced as described in methods and F3 (5, 10 or 20 mg/kg) was injected intraperitoneally (day 1) only after arthritis scores reached ~2. Table provides body weight measurements as a function of time.

### 1-way ANOVA - Body Weight

|                               | Day    |       |      |        |       |       |        |       |      |        |       |      |        |       |      |        |       |       |        |       |      |        |       |       |        |       |       |
|-------------------------------|--------|-------|------|--------|-------|-------|--------|-------|------|--------|-------|------|--------|-------|------|--------|-------|-------|--------|-------|------|--------|-------|-------|--------|-------|-------|
|                               | 1      |       |      | 2      |       |       | 3      |       |      | 4      |       |      | 5      |       |      | 6      |       |       | 7      |       |      | 8      |       |       | 9      |       |       |
| SS (Between   Within   Total) | 0.64   | 5.57  | 6.21 | 0.78   | 9.25  | 10.02 | 0.59   | 9.05  | 9.64 | 1.05   | 7.56  | 8.61 | 0.48   | 8.52  | 9.00 | 1.11   | 9.95  | 11.07 | 2.34   | 6.97  | 9.30 | 2.99   | 9.76  | 12.75 | 3.04   | 16.65 | 19.70 |
| df (Between   Within   Total) | 3      | 8     | 11   | 3      | 8     | 11    | 3      | 8     | 11   | 3      | 8     | 11   | 3      | 8     | 11   | 3      | 8     | 11    | 3      | 8     | 11   | 3      | 8     | 11    | 3      | 8     | 11    |
| MS (Between   Within)         | 0.214  | 0.795 |      | 0.259  | 1.321 |       | 0.196  | 1.293 |      | 0.349  | 1.080 |      | 0.159  | 1.217 |      | 0.371  | 1.422 |       | 0.778  | 0.995 |      | 0.997  | 1.394 |       | 1.014  | 2.379 |       |
| F                             | 0.269  |       |      | 0.196  |       |       | 0.152  |       |      | 0.323  |       |      | 0.131  |       |      | 0.261  |       |       | 0.782  |       |      | 0.715  |       |       | 0.426  |       |       |
| p-value                       | 0.8462 |       |      | 0.8958 |       |       | 0.9253 |       |      | 0.8088 |       |      | 0.9389 |       |      | 0.8513 |       |       | 0.5406 |       |      | 0.5735 |       |       | 0.7404 |       |       |

| post-hoc Tukey Test (p-value)   |   |   |   |   |   |   |   |   |   |
|---------------------------------|---|---|---|---|---|---|---|---|---|
| Disease vs. F3 (5 mg/kg)        | - | - | - | - | - | - | - | - | - |
| Disease vs. F3 (10 mg/kg)       | - | - | - | - | - | - | - | - | - |
| Disease vs. F3 (20 mg/kg)       | - | - | - | - | - | - | - | - | - |
| F3 (5 mg/kg) vs. F3 (10 mg/kg)  | - | - | - | - | - | - | - | - | - |
| F3 (5 mg/kg) vs. F3 (20 mg/kg)  | - | - | - | - | - | - | - | - | - |
| F3 (10 mg/kg) vs. F3 (20 mg/kg) | - | - | - | - | - | - | - | - | - |

### 1-way ANOVA - Body Weight

|                               | Day    |       |       |        |       |       |        |       |       |          |       |       |        |       |       |        |       |       |        |       |       |        |       |       |  |  |  |
|-------------------------------|--------|-------|-------|--------|-------|-------|--------|-------|-------|----------|-------|-------|--------|-------|-------|--------|-------|-------|--------|-------|-------|--------|-------|-------|--|--|--|
|                               | 10     |       |       | 11     |       |       | 12     |       |       | 13       |       |       | 14     |       |       | 15     |       |       | 16     |       |       | 17     |       |       |  |  |  |
| SS (Between   Within   Total) | 4.19   | 8.51  | 12.70 | 1.44   | 8.72  | 10.16 | 2.46   | 11.83 | 14.29 | 5.22     | 13.68 | 18.90 | 4.89   | 16.02 | 20.91 | 4.03   | 17.57 | 21.60 | 3.28   | 15.57 | 18.85 | 4.65   | 14.18 | 18.83 |  |  |  |
| df (Between   Within   Total) | 3      | 8     | 11    | 3      | 8     | 11    | 3      | 8     | 11    | 3        | 8     | 11    | 3      | 8     | 11    | 3      | 8     | 11    | 3      | 8     | 11    | 3      | 8     | 11    |  |  |  |
| MS (Between   Within)         | 1.397  | 1.216 |       | 0.479  | 1.246 |       | 0.819  | 1.690 |       | 1.741    | 1.954 |       | 1.629  | 2.288 |       | 1.344  | 2.509 |       | 1.095  | 2.224 |       | 1.549  | 2.026 |       |  |  |  |
| F                             | 1.149  |       |       | 0.385  |       |       | 0.484  |       |       | 0.891    |       |       | 0.712  |       |       | 0.536  |       |       | 0.492  |       |       | 0.765  |       |       |  |  |  |
| p-value                       | 0.3940 |       |       | 0.7675 |       |       | 0.7037 |       |       | 4.91E-01 |       |       | 0.5752 |       |       | 0.6726 |       |       | 0.6988 |       |       | 0.5489 |       |       |  |  |  |

| post-hoc Tukey Test (p-value)   |   |   |   |   |   |   |   |   |   |
|---------------------------------|---|---|---|---|---|---|---|---|---|
| Disease vs. F3 (5 mg/kg)        | - | - | - | - | - | - | - | - | - |
| Disease vs. F3 (10 mg/kg)       | - | - | - | - | - | - | - | - | - |
| Disease vs. F3 (20 mg/kg)       | - | - | - | - | - | - | - | - | - |
| F3 (5 mg/kg) vs. F3 (10 mg/kg)  | - | - | - | - | - | - | - | - | - |
| F3 (5 mg/kg) vs. F3 (20 mg/kg)  | - | - | - | - | - | - | - | - | - |
| F3 (10 mg/kg) vs. F3 (20 mg/kg) | - | - | - | - | - | - | - | - | - |

SI Figure 42. Statistical analysis of differences in body weight following F3 treatment in mice induced to develop arthritis (from **Fig. 5B**). Arthritis was induced as described in methods and F3 (5, 10 or 20 mg/kg) was injected intraperitoneally (day 1) only after arthritis scores reached ~2. A 1-way ANOVA followed by a post-hoc Tukey test was used to determine if there were any significant differences in body weight between groups. A p-value < 0.05 was considered significant and highlighted in yellow.

# **Collagen/Tuberculosis Bacteria RA Model**

## **Restorative Treatment – Full Study**

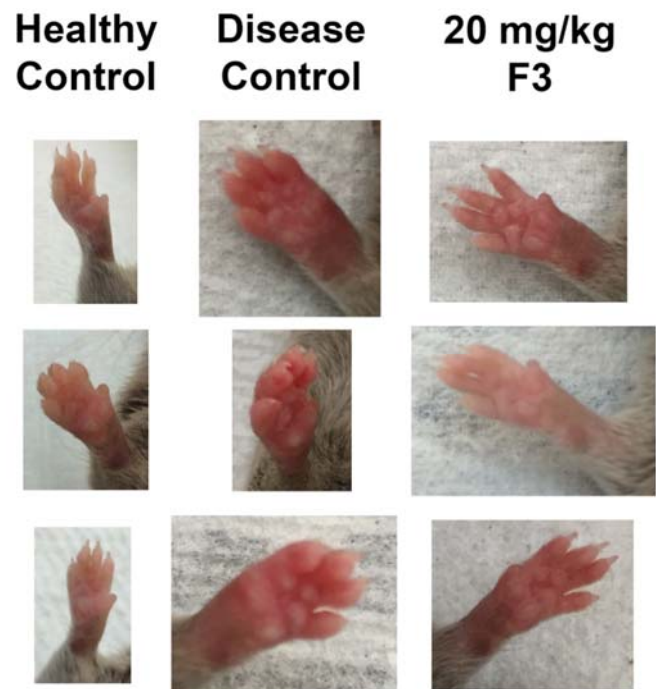

SI Figure 43. Images of paws from F3-treated and untreated mice induced to develop arthritis (from **Fig. 6**). Arthritis was induced as described in methods and F3 (20 mg/kg) was injected intraperitoneally (day 1) only after arthritis scores reached ~4. Images of paws were acquired on Day 0 and Day 18.

Healthy (Vehicle Control) - Paw Thickness (mm)

|                    | Days |      |      |      |      |      |      |      |      |
|--------------------|------|------|------|------|------|------|------|------|------|
|                    | 1    | 3    | 5    | 7    | 9    | 11   | 13   | 15   | 17   |
| n                  | 6    | 6    | 6    | 6    | 6    | 6    | 6    | 6    | 6    |
| average            | 1.21 | 1.18 | 1.27 | 1.19 | 1.19 | 1.14 | 1.18 | 1.20 | 1.22 |
| standard deviation | 0.07 | 0.03 | 0.10 | 0.03 | 0.04 | 0.02 | 0.03 | 0.04 | 0.04 |
| standard error     | 0.03 | 0.01 | 0.04 | 0.01 | 0.02 | 0.01 | 0.01 | 0.02 | 0.02 |

RA (Vehicle Control) - Paw Thickness (mm)

|                    | Days |      |      |      |      |      |      |      |      |
|--------------------|------|------|------|------|------|------|------|------|------|
|                    | 1    | 3    | 5    | 7    | 9    | 11   | 13   | 15   | 17   |
| n                  | 10   | 10   | 10   | 10   | 10   | 10   | 10   | 10   | 10   |
| average            | 1.53 | 1.78 | 1.86 | 1.89 | 2.15 | 2.22 | 2.38 | 2.50 | 2.59 |
| standard deviation | 0.11 | 0.24 | 0.40 | 0.34 | 0.52 | 0.46 | 0.47 | 0.44 | 0.45 |
| standard error     | 0.04 | 0.08 | 0.13 | 0.11 | 0.16 | 0.15 | 0.15 | 0.14 | 0.14 |

20 mg/kg F3 - Paw Thickness (mm)

|                    | Days |      |      |      |      |      |      |      |      |
|--------------------|------|------|------|------|------|------|------|------|------|
|                    | 1    | 3    | 5    | 7    | 9    | 11   | 13   | 15   | 17   |
| n                  | 9    | 9    | 9    | 9    | 9    | 9    | 9    | 9    | 9    |
| average            | 1.61 | 1.51 | 1.54 | 1.53 | 1.54 | 1.46 | 1.51 | 1.48 | 1.43 |
| standard deviation | 0.20 | 0.16 | 0.23 | 0.18 | 0.23 | 0.18 | 0.23 | 0.19 | 0.23 |
| standard error     | 0.07 | 0.05 | 0.08 | 0.06 | 0.08 | 0.06 | 0.08 | 0.06 | 0.08 |

SI Figure 44. Comparison of paw thickness following F3 treatment in mice induced to develop arthritis (from **Fig. 6A**). Arthritis was induced as described in methods and F3 (20 mg/kg) was injected intraperitoneally (day 1) only after arthritis scores reached ~4. Table provides paw thickness measurements as a function of time.

### 1-way ANOVA - Paw Thickness

|                                      | Day      |       |     |          |       |     |          |       |     |          |       |     |          |       |     |          |       |     |          |       |     |          |       |     |          |       |      |
|--------------------------------------|----------|-------|-----|----------|-------|-----|----------|-------|-----|----------|-------|-----|----------|-------|-----|----------|-------|-----|----------|-------|-----|----------|-------|-----|----------|-------|------|
|                                      | 1        |       |     | 3        |       |     | 5        |       |     | 7        |       |     | 9        |       |     | 11       |       |     | 13       |       |     | 15       |       |     | 17       |       |      |
| SS (Between   Within   Total)        | 0.6      | 0.5   | 1.1 | 1.3      | 0.7   | 2.1 | 1.4      | 1.9   | 3.3 | 1.9      | 1.3   | 3.2 | 3.9      | 2.8   | 6.7 | 5.1      | 2.2   | 7.3 | 6.4      | 2.4   | 8.8 | 7.9      | 2.0   | 9.9 | 8.5      | 1.9   | 10.4 |
| df (Between   Within   Total)        | 2        | 22    | 24  | 2        | 22    | 24  | 2        | 22    | 24  | 2        | 22    | 24  | 2        | 22    | 24  | 2        | 22    | 24  | 2        | 22    | 24  | 2        | 22    | 24  | 2        | 22    | 24   |
| MS (Between   Within)                | 0.322    | 0.021 |     | 0.664    | 0.034 |     | 0.677    | 0.087 |     | 0.953    | 0.060 |     | 1.929    | 0.130 |     | 2.530    | 0.100 |     | 3.200    | 0.108 |     | 3.953    | 0.091 |     | 4.251    | 0.102 |      |
| F                                    | 15.538   |       |     | 19.610   |       |     | 7.763    |       |     | 15.791   |       |     | 14.894   |       |     | 25.336   |       |     | 29.654   |       |     | 43.508   |       |     | 41.743   |       |      |
| p-value                              | 6.21E-05 |       |     | 1.29E-05 |       |     | 2.80E-03 |       |     | 5.59E-05 |       |     | 8.13E-05 |       |     | 1.96E-06 |       |     | 5.69E-07 |       |     | 2.26E-08 |       |     | 1.11E-07 |       |      |
| <b>post-hoc Tukey Test (p-value)</b> |          |       |     |          |       |     |          |       |     |          |       |     |          |       |     |          |       |     |          |       |     |          |       |     |          |       |      |
| Healthy vs. Disease                  | 0.0010   |       |     | 0.0010   |       |     | 0.0024   |       |     | 0.0010   |       |     | 0.0010   |       |     | 0.0010   |       |     | 0.0010   |       |     | 0.0010   |       |     | 0.0010   |       |      |
| Healthy vs. F3 (20 mg/kg)            | 0.0010   |       |     | 0.0071   |       |     | 0.2265   |       |     | 0.0434   |       |     | 0.1806   |       |     | 0.1666   |       |     | 0.1613   |       |     | 0.2022   |       |     | 0.4754   |       |      |
| Disease vs. F3 (20 mg/kg)            | 0.4666   |       |     | 0.0132   |       |     | 0.0660   |       |     | 0.0098   |       |     | 0.0033   |       |     | 0.0010   |       |     | 0.0010   |       |     | 0.0010   |       |     | 0.0010   |       |      |

SI Figure 45. Statistical analysis of differences in paw thickness following F3 treatment in mice induced to develop arthritis (from **Fig. 6A**). Arthritis was induced as described in methods and F3 (20 mg/kg) was injected intraperitoneally (day 1) only after arthritis scores reached ~4. A 1-way ANOVA followed by a post-hoc Tukey test was used to determine if there were any significant differences between groups. A p-value < 0.05 was considered significant and highlighted in yellow.



### Healthy (Vehicle Control) - Arthritis Score

|                    | Days |      |      |      |      |      |      |      |      |
|--------------------|------|------|------|------|------|------|------|------|------|
|                    | 1    | 3    | 5    | 7    | 9    | 11   | 13   | 15   | 17   |
| n                  | 6    | 6    | 6    | 6    | 6    | 6    | 6    | 6    | 6    |
| average            | 0.00 | 0.00 | 0.00 | 0.00 | 0.00 | 0.00 | 0.00 | 0.00 | 0.00 |
| standard deviation | 0.00 | 0.00 | 0.00 | 0.00 | 0.00 | 0.00 | 0.00 | 0.00 | 0.00 |
| standard error     | 0.00 | 0.00 | 0.00 | 0.00 | 0.00 | 0.00 | 0.00 | 0.00 | 0.00 |

### RA (Vehicle Control) - Arthritis Score

|                    | Days |      |      |      |       |       |       |       |       |
|--------------------|------|------|------|------|-------|-------|-------|-------|-------|
|                    | 1    | 3    | 5    | 7    | 9     | 11    | 13    | 15    | 17    |
| n                  | 7    | 7    | 7    | 7    | 7     | 7     | 7     | 7     | 7     |
| average            | 4.91 | 6.41 | 7.36 | 8.20 | 10.14 | 10.91 | 12.14 | 11.81 | 10.93 |
| standard deviation | 1.40 | 1.84 | 2.88 | 2.92 | 3.77  | 2.81  | 2.03  | 2.41  | 1.13  |
| standard error     | 0.53 | 0.69 | 1.09 | 1.11 | 1.43  | 1.06  | 0.77  | 0.91  | 0.43  |

### 20 mg/kg F3 - Arthritis Score

|                    | Days |      |      |      |      |      |      |      |      |
|--------------------|------|------|------|------|------|------|------|------|------|
|                    | 1    | 3    | 5    | 7    | 9    | 11   | 13   | 15   | 17   |
| n                  | 8    | 8    | 8    | 8    | 8    | 8    | 8    | 8    | 8    |
| average            | 3.99 | 3.25 | 3.69 | 2.79 | 3.48 | 2.40 | 2.69 | 2.29 | 2.47 |
| standard deviation | 0.93 | 1.28 | 2.13 | 2.48 | 2.42 | 2.13 | 2.19 | 2.82 | 2.36 |
| standard error     | 0.33 | 0.45 | 0.75 | 0.88 | 0.86 | 0.75 | 0.77 | 1.00 | 0.83 |

SI Figure 46. Comparison of Arthritis Score following F3 treatment in mice induced to develop arthritis (from **Fig. 6B**). Arthritis was induced as described in methods and F3 (20 mg/kg) was injected intraperitoneally (day 1) only after arthritis scores reached ~4. Table provides Arthritis Score measurements as a function of time.

### 1-way ANOVA - Arthritis Score

|                                      | Day      |       |       |          |       |       |          |       |       |          |       |       |          |       |       |          |       |       |          |       |       |          |       |       |          |       |       |        |  |  |
|--------------------------------------|----------|-------|-------|----------|-------|-------|----------|-------|-------|----------|-------|-------|----------|-------|-------|----------|-------|-------|----------|-------|-------|----------|-------|-------|----------|-------|-------|--------|--|--|
|                                      | 1        |       |       | 3        |       |       | 5        |       |       | 7        |       |       | 9        |       |       | 11       |       |       | 13       |       |       | 15       |       |       | 17       |       |       |        |  |  |
| SS (Between   Within   Total)        | 86.9     | 17.8  | 104.7 | 133.1    | 31.8  | 164.9 | 175.2    | 81.5  | 256.8 | 230.4    | 94.2  | 324.6 | 351.9    | 126.4 | 478.3 | 444.7    | 79.1  | 523.9 | 549.8    | 58.1  | 607.9 | 533.1    | 90.8  | 623.9 | 433.8    | 35.5  | 469.3 |        |  |  |
| df (Between   Within   Total)        | 2        | 18    | 20    | 2        | 18    | 20    | 2        | 18    | 20    | 2        | 18    | 20    | 2        | 18    | 20    | 2        | 18    | 20    | 2        | 18    | 20    | 2        | 18    | 20    | 2        | 18    | 20    |        |  |  |
| MS (Between   Within)                | 43.467   | 0.987 |       | 66.565   | 1.765 |       | 87.623   | 4.528 |       | 115.180  | 5.234 |       | 175.959  | 7.022 |       | 222.362  | 4.397 |       | 274.909  | 3.227 |       | 266.570  | 5.042 |       | 216.911  | 2.221 |       |        |  |  |
| F                                    | 44.061   |       |       | 37.715   |       |       | 19.351   |       |       | 22.007   |       |       | 25.059   |       |       | 50.570   |       |       | 85.190   |       |       | 52.869   |       |       | 97.687   |       |       |        |  |  |
| p-value                              | 1.16E-07 |       |       | 3.66E-07 |       |       | 3.27E-05 |       |       | 1.46E-05 |       |       | 6.28E-06 |       |       | 4.10E-08 |       |       | 6.64E-10 |       |       | 2.92E-08 |       |       | 1.08E-09 |       |       |        |  |  |
| <b>post-hoc Tukey Test (p-value)</b> |          |       |       |          |       |       |          |       |       |          |       |       |          |       |       |          |       |       |          |       |       |          |       |       |          |       |       |        |  |  |
| Healthy vs. Disease                  | 0.0010   |       |       | 0.0010   |       |       | 0.0010   |       |       | 0.0010   |       |       | 0.0010   |       |       | 0.0010   |       |       | 0.0010   |       |       | 0.0010   |       |       | 0.0010   |       |       | 0.0010 |  |  |
| Healthy vs. F3 (20 mg/kg)            | 0.0010   |       |       | 0.0010   |       |       | 0.0128   |       |       | 0.0884   |       |       | 0.0637   |       |       | 0.1139   |       |       | 0.0321   |       |       | 0.1713   |       |       | 0.0285   |       |       |        |  |  |
| Disease vs. F3 (20 mg/kg)            | 0.1968   |       |       | 0.0010   |       |       | 0.0098   |       |       | 0.0010   |       |       | 0.0010   |       |       | 0.0010   |       |       | 0.0010   |       |       | 0.0010   |       |       | 0.0010   |       |       | 0.0010 |  |  |

SI Figure 47. Statistical analysis of differences in Arthritis Score following F3 treatment in mice induced to develop arthritis (from **Fig. 6B**). Arthritis was induced as described in methods and F3 (20 mg/kg) was injected intraperitoneally (day 1) only after arthritis scores reached ~4. A 1-way ANOVA followed by a post-hoc Tukey test was used to determine if there were any significant differences between groups. A p-value < 0.05 was considered significant and highlighted in yellow.

### Bone Density (BV/TV)

#### 1-Way Anova

|         | SS     | df | MS     | F      | p        |
|---------|--------|----|--------|--------|----------|
| Between | 0.1588 | 2  | 0.0794 | 76.401 | 1.49E-07 |
| Within  | 0.0125 | 12 | 0.0010 |        |          |
| Total   | 0.1713 | 14 |        |        |          |

#### Tukey Test (p-value)

|         | Healthy | Disease | F3     |
|---------|---------|---------|--------|
| Healthy | -       | 0.0010  | 0.5333 |
| Disease |         | -       | 0.0010 |
| F3      |         |         | -      |

### Connectivity Density

#### 1-Way Anova

|         | SS        | df | MS        | F     | p        |
|---------|-----------|----|-----------|-------|----------|
| Between | 9,120,858 | 2  | 4,560,429 | 68.39 | 2.75E-07 |
| Within  | 800,212   | 12 | 66,684    |       |          |
| Total   | 9,921,071 | 14 |           |       |          |

#### Tukey Test (p-value)

|         | Healthy | Disease | F3     |
|---------|---------|---------|--------|
| Healthy | -       | 0.0010  | 0.2218 |
| Disease |         | -       | 0.0010 |
| F3      |         |         | -      |

### Structure Model Index

#### 1-Way Anova

|         | SS    | df | MS     | F      | p        |
|---------|-------|----|--------|--------|----------|
| Between | 11.78 | 2  | 5.8912 | 110.29 | 1.89E-08 |
| Within  | 0.64  | 12 | 0.0534 |        |          |
| Total   | 12.42 | 14 |        |        |          |

#### Tukey Test (p-value)

|         | Healthy | Disease | F3     |
|---------|---------|---------|--------|
| Healthy | -       | 0.0010  | 0.8543 |
| Disease |         | -       | 0.0010 |
| F3      |         |         | -      |

### Trabecular Thickness

#### 1-Way Anova

|         | SS     | df | MS | F      | p      |
|---------|--------|----|----|--------|--------|
| Between | 0      | 2  | 0  | 0.6759 | 0.5270 |
| Within  | 0.0003 | 12 | 0  |        |        |
| Total   | 0.0003 | 14 |    |        |        |

### Trabecular Spacing

#### 1-Way Anova

|         | SS     | df | MS     | F      | p      |
|---------|--------|----|--------|--------|--------|
| Between | 0.0010 | 2  | 0.0005 | 0.5299 | 0.6018 |
| Within  | 0.0111 | 12 | 0.0009 |        |        |
| Total   | 0.0120 | 14 |        |        |        |

SI Figure 48. Statistical analysis of differences in morphometric bone parameters following F3 treatment in mice induced to develop arthritis (from **Fig. 6D-6H**). Arthritis was induced as described in methods and F3 (20 mg/kg) was injected intraperitoneally (day 1) only after arthritis scores reached ~4. A 1-way ANOVA followed by a post-hoc Tukey test was used to determine if there were any significant differences between groups. A p-value < 0.05 was considered significant and highlighted in yellow.

|                    | Relative Intensity |                 |             |
|--------------------|--------------------|-----------------|-------------|
|                    | Healthy Control    | Disease Control | 20 mg/kg F3 |
| n                  | 6                  | 6               | 6           |
| average            | 1.92               | 77.17           | 1.67        |
| standard deviation | 3.24               | 41.36           | 2.61        |
| standard error     | 1.32               | 16.89           | 1.06        |

| 1-Way Anova |       |    |       |        |          |
|-------------|-------|----|-------|--------|----------|
|             | SS    | df | MS    | F      | p        |
| Between     | 22725 | 2  | 11363 | 19.727 | 6.32E-05 |
| Within      | 8640  | 15 | 576   |        |          |
| Total       | 31365 | 17 |       |        |          |

| Tukey Test (p-value) |         |         |        |
|----------------------|---------|---------|--------|
|                      | Healthy | Disease | F3     |
| Healthy              | -       | 0.0010  | 0.9000 |
| Disease              |         | -       | 0.0010 |
| F3                   |         |         | -      |

SI Figure 49. Comparison and statistical analysis of differences in uptake of a  $^{99m}\text{Tc}$ -folate receptor-targeted imaging agent (EC20; 75 nmol/kg) following F3 treatment in mice induced to develop arthritis (from **Fig. 6I**). Arthritis was induced as described in methods and F3 (20 mg/kg) was injected intraperitoneally (day 1) only after arthritis scores reached ~4. Table provides the relative intensity on day 18. A 1-way ANOVA followed by a post-hoc Tukey test was used to determine if there were any significant differences between groups. A p-value < 0.05 was considered significant and highlighted in yellow.

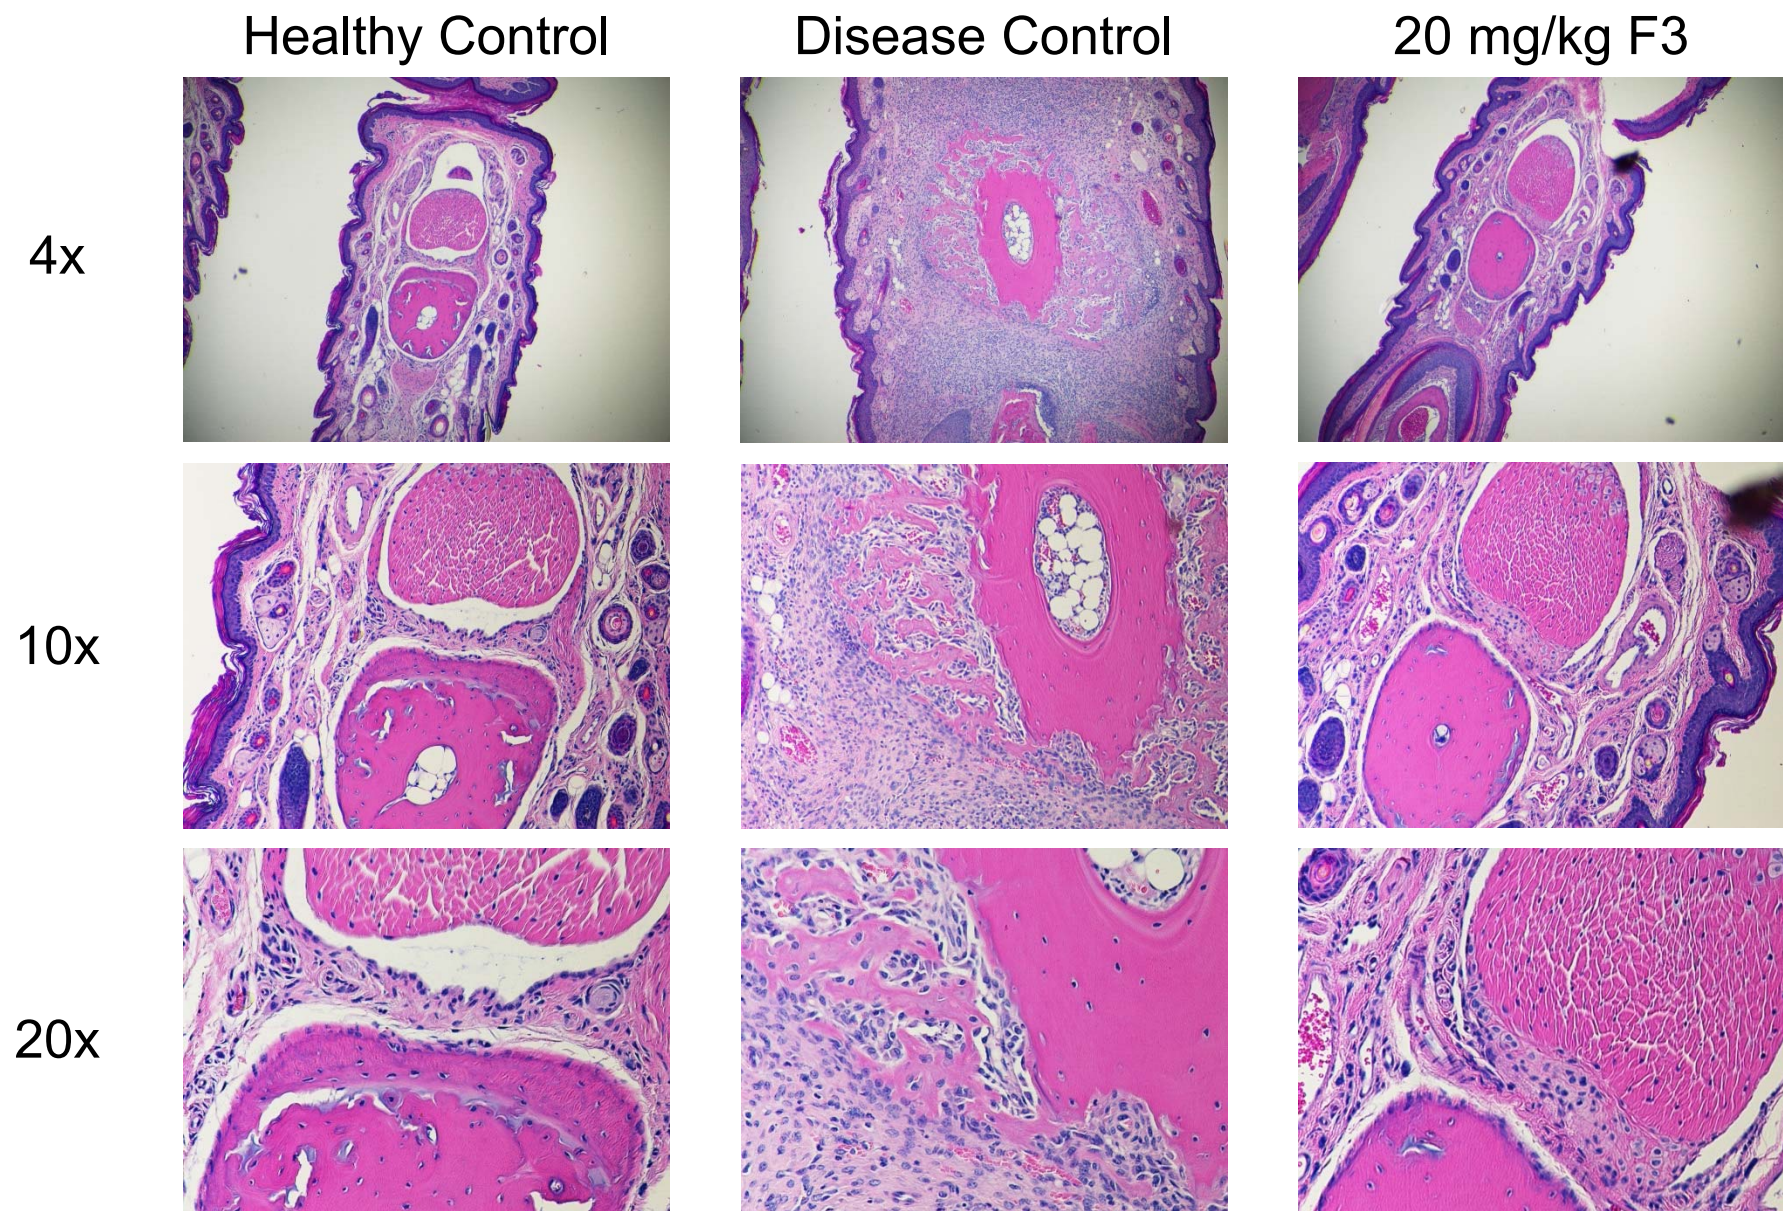

SI Figure 50. H&E staining of joints following F3 treatment in mice induced to develop arthritis (from **Fig. 6J**). Arthritis was induced as described in methods and F3 (20 mg/kg) was injected intraperitoneally (day 1) only after arthritis scores reached ~4. At the end of the study (day 18), sections of joint tissue were H&E stained and imaged at various magnifications.

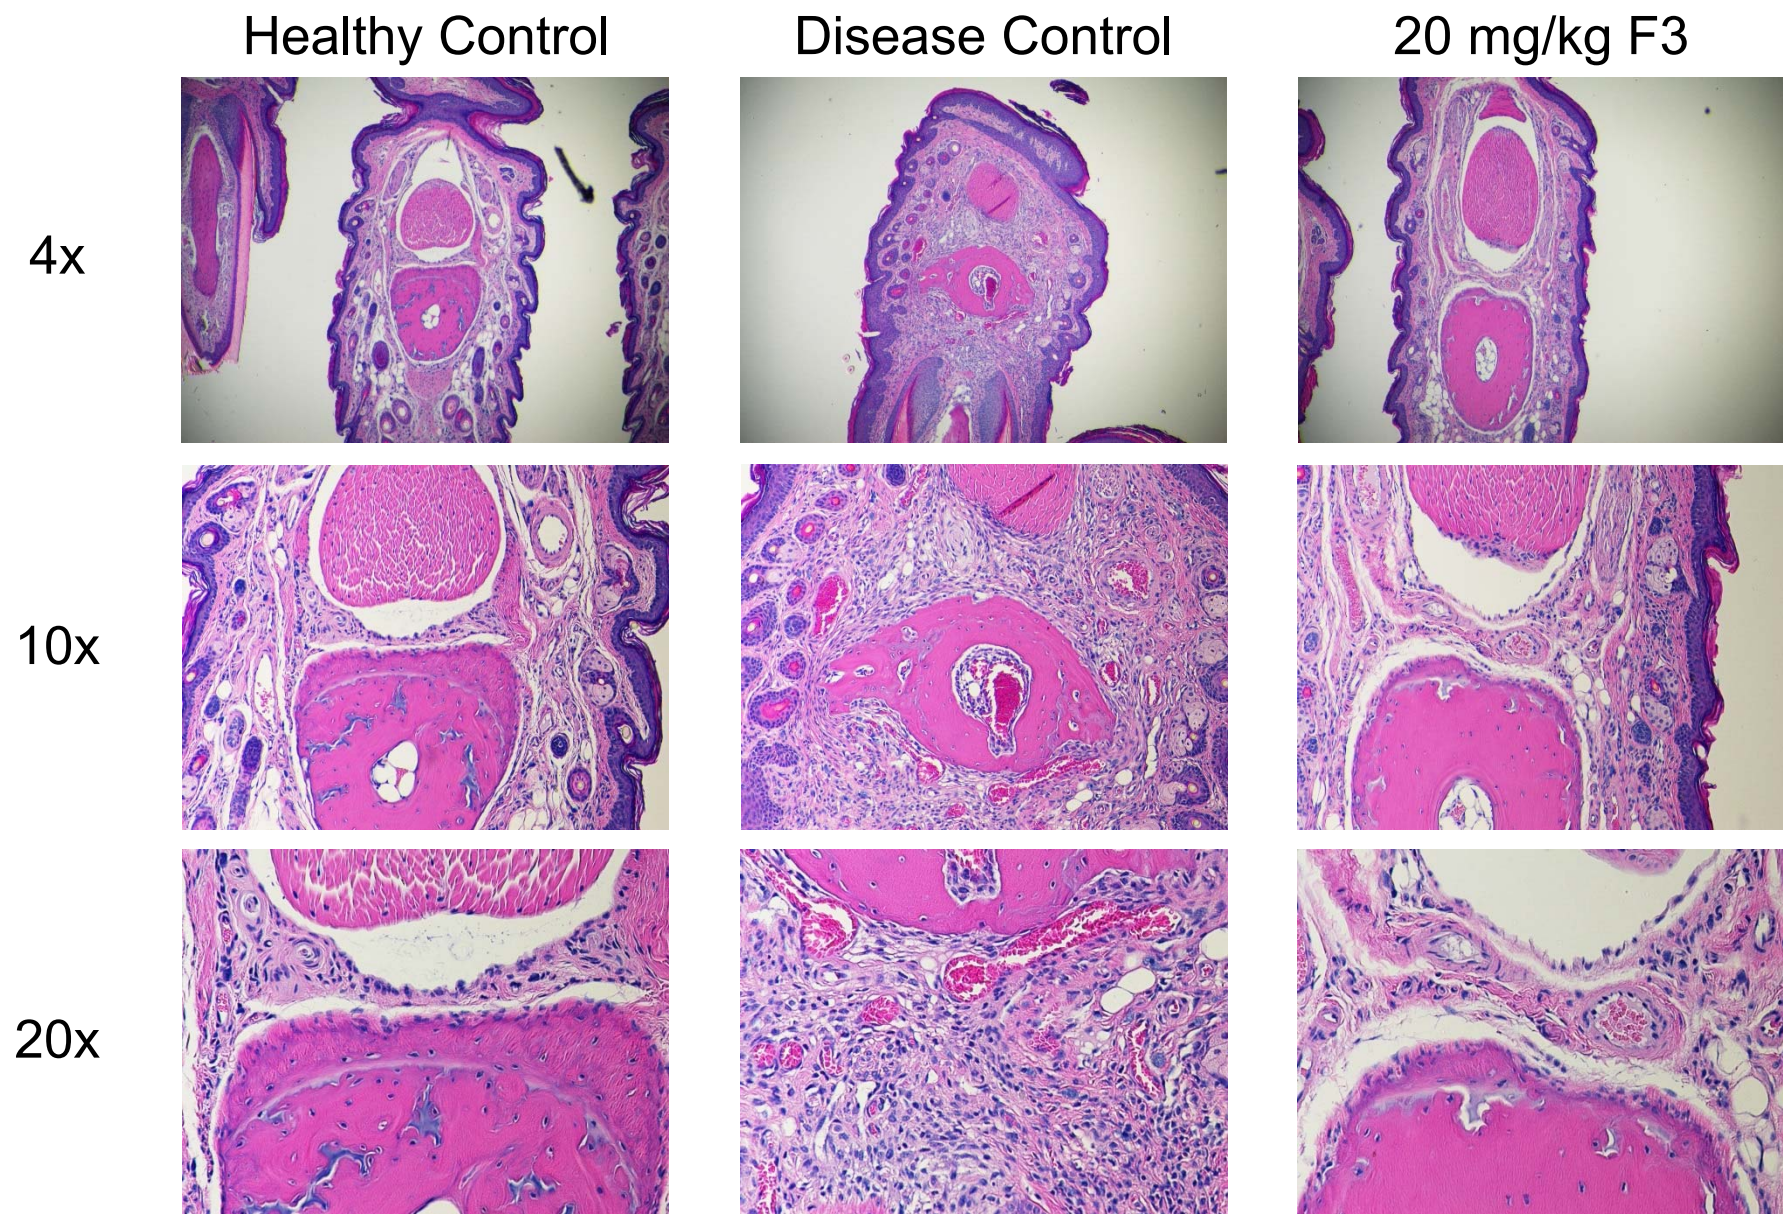

SI Figure 51. H&E staining of joints following F3 treatment in mice induced to develop arthritis (from **Fig. 6J**). Arthritis was induced as described in methods and F3 (20 mg/kg) was injected intraperitoneally (day 1) only after arthritis scores reached ~4. At the end of the study (day 18), sections of joint tissue were H&E stained and imaged at various magnifications.

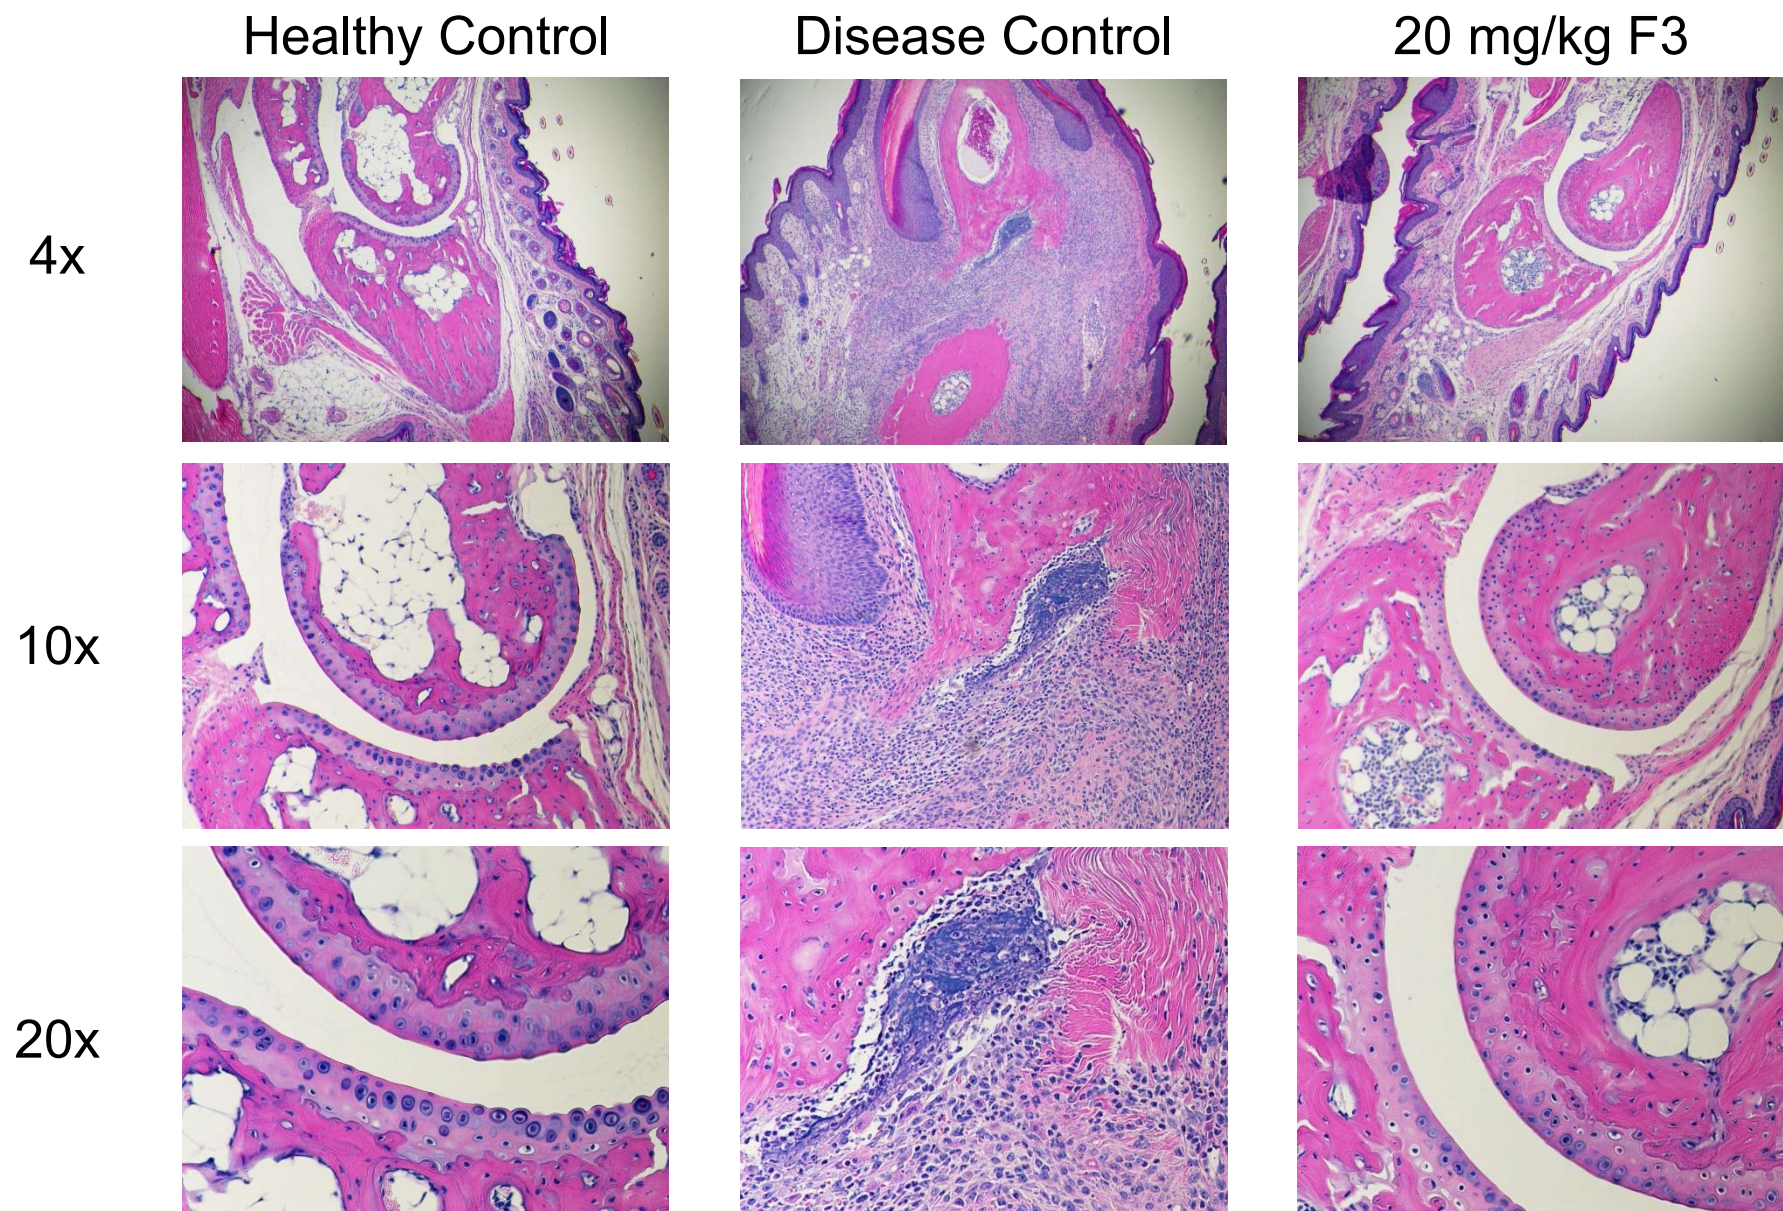

SI Figure 52. H&E staining of joints following F3 treatment in mice induced to develop arthritis (from **Fig. 6J**). Arthritis was induced as described in methods and F3 (20 mg/kg) was injected intraperitoneally (day 1) only after arthritis scores reached ~4. At the end of the study (day 18), sections of joint tissue were H&E stained and imaged at various magnifications.

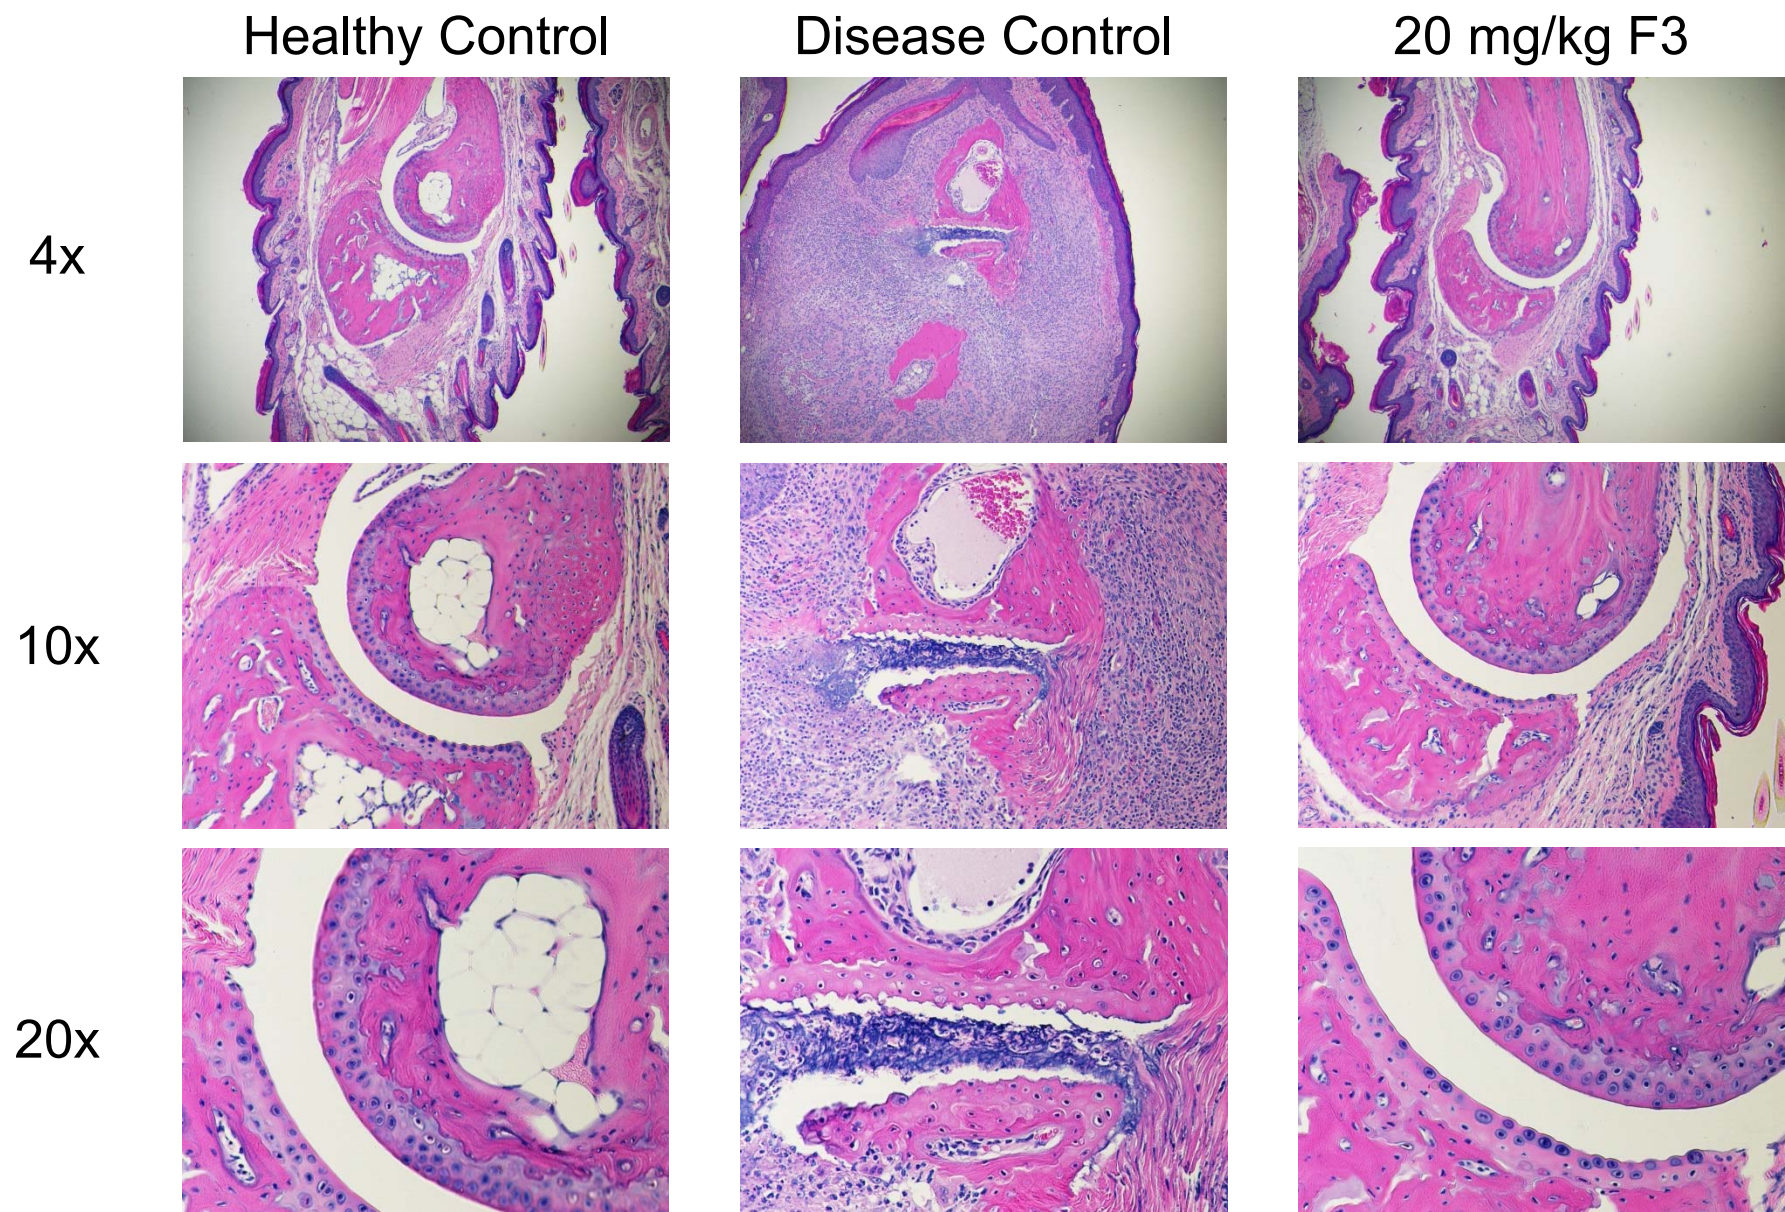

SI Figure 53. H&E staining of joints following F3 treatment in mice induced to develop arthritis (from **Fig. 6J**). Arthritis was induced as described in methods and F3 (20 mg/kg) was injected intraperitoneally (day 1) only after arthritis scores reached ~4. At the end of the study (day 18), sections of joint tissue were H&E stained and imaged at various magnifications.



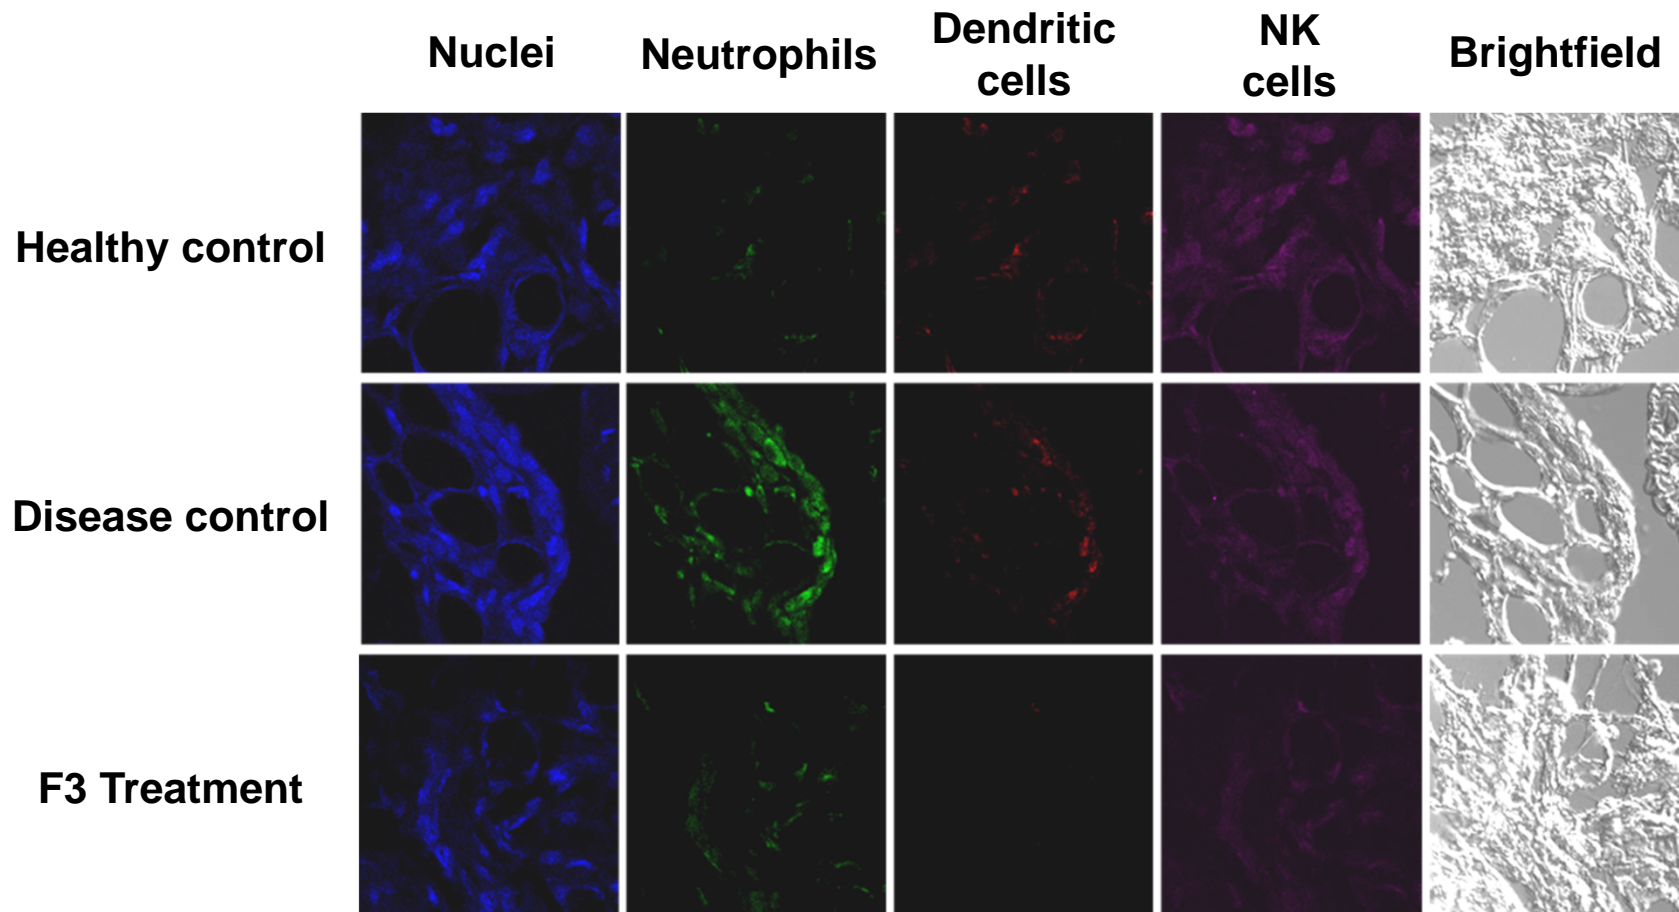

SI Figure 54. Immunofluorescent staining of different immune cell populations in thin sections of joints following F3 treatment in mice induced to develop arthritis (from **Fig. 6K**). Arthritis was induced as described in methods and F3 (20 mg/kg) was injected intraperitoneally (day 1) only after arthritis scores reached ~4. At the end of the study (day 18), sections of joint tissue were stained with cell specific markers and imaged via fluorescent microscopy.

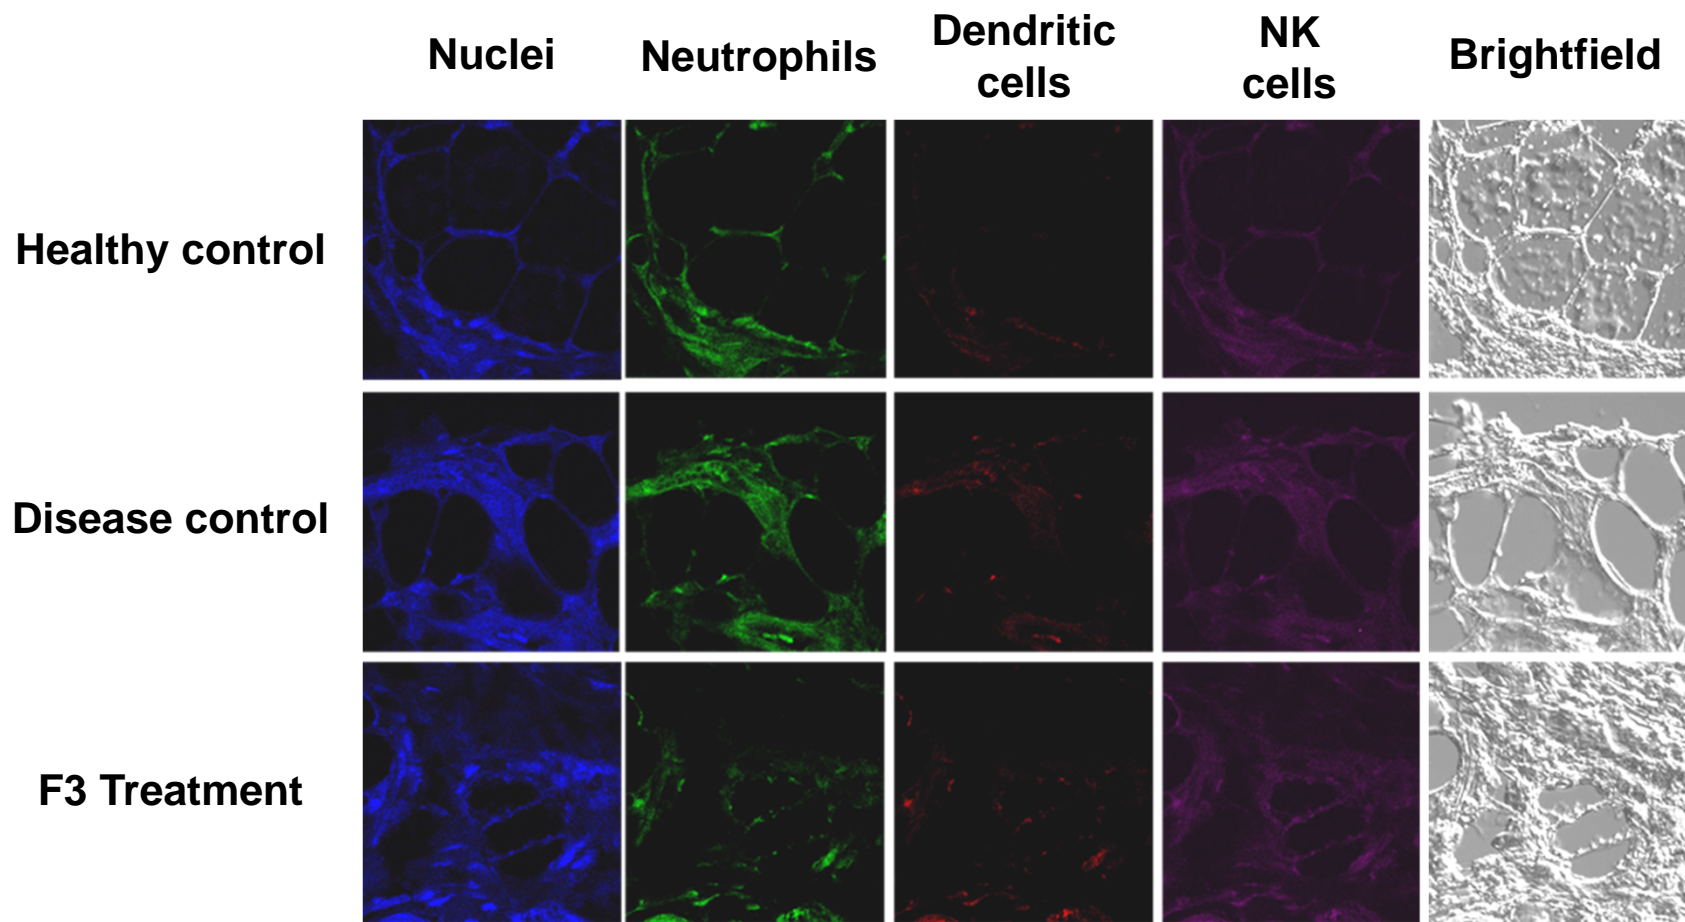

SI Figure 55. Immunofluorescent staining of different immune cell populations in thin sections of joints following F3 treatment in mice induced to develop arthritis (from **Fig. 6K**). Arthritis was induced as described in methods and F3 (20 mg/kg) was injected intraperitoneally (day 1) only after arthritis scores reached ~4. At the end of the study (day 18), sections of joint tissue were stained with cell specific markers and imaged via fluorescent microscopy.

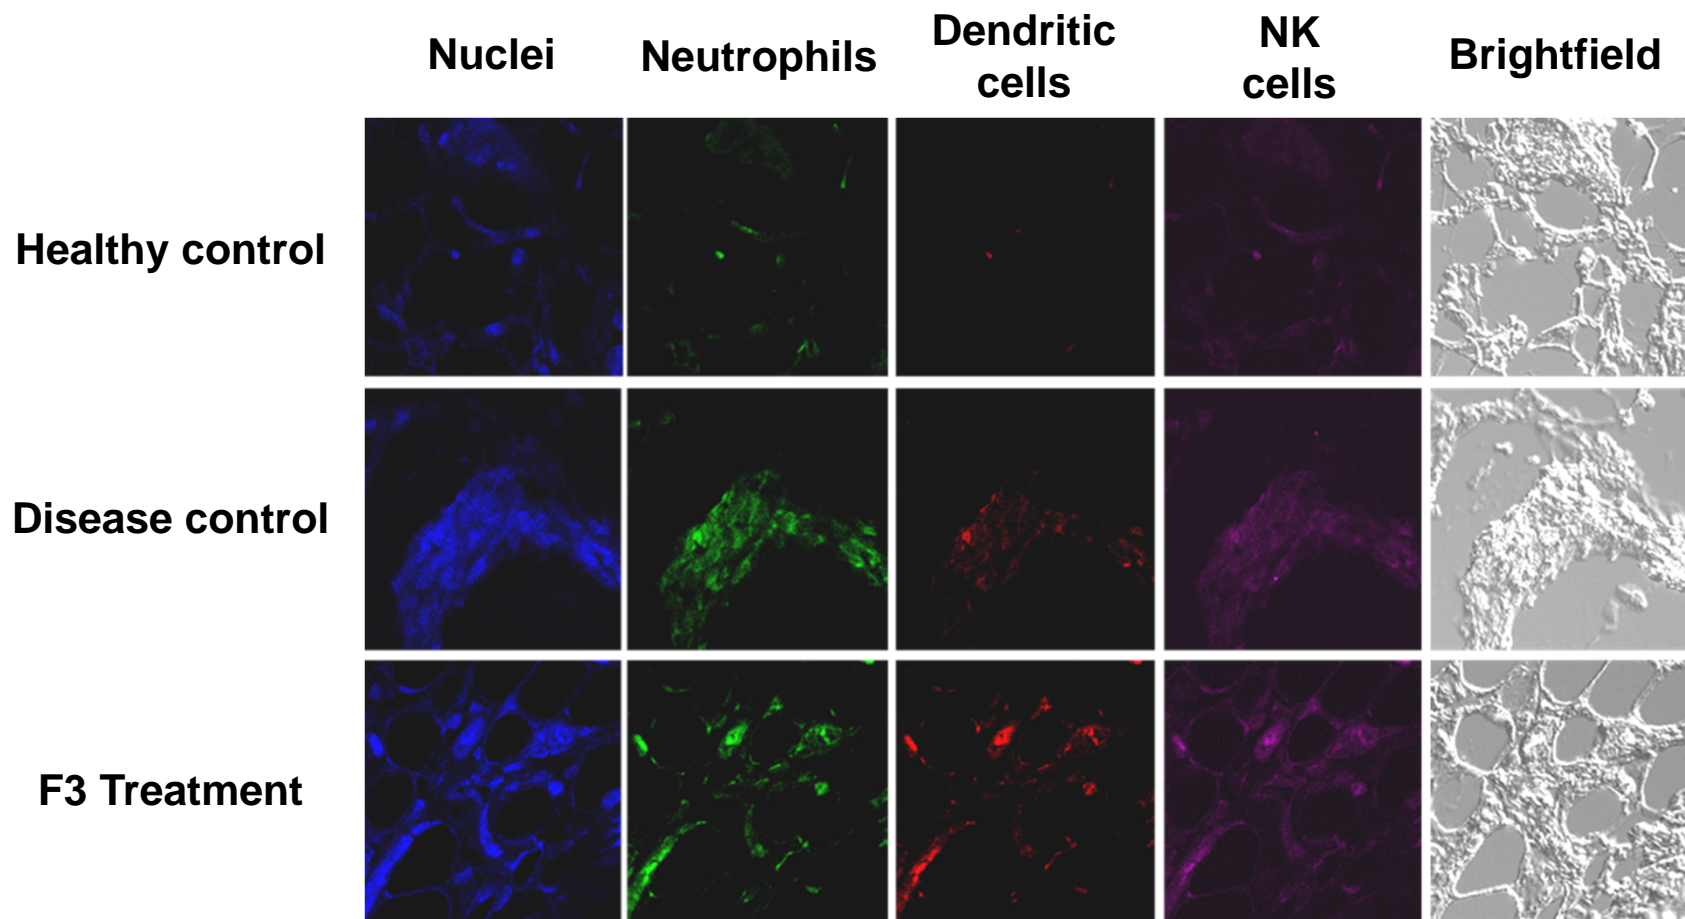

SI Figure 56. Immunofluorescent staining of different immune cell populations in thin sections of joints following F3 treatment in mice induced to develop arthritis (from **Fig. 6K**). Arthritis was induced as described in methods and F3 (20 mg/kg) was injected intraperitoneally (day 1) only after arthritis scores reached ~4. At the end of the study (day 18), sections of joint tissue were stained with cell specific markers and imaged via fluorescent microscopy.

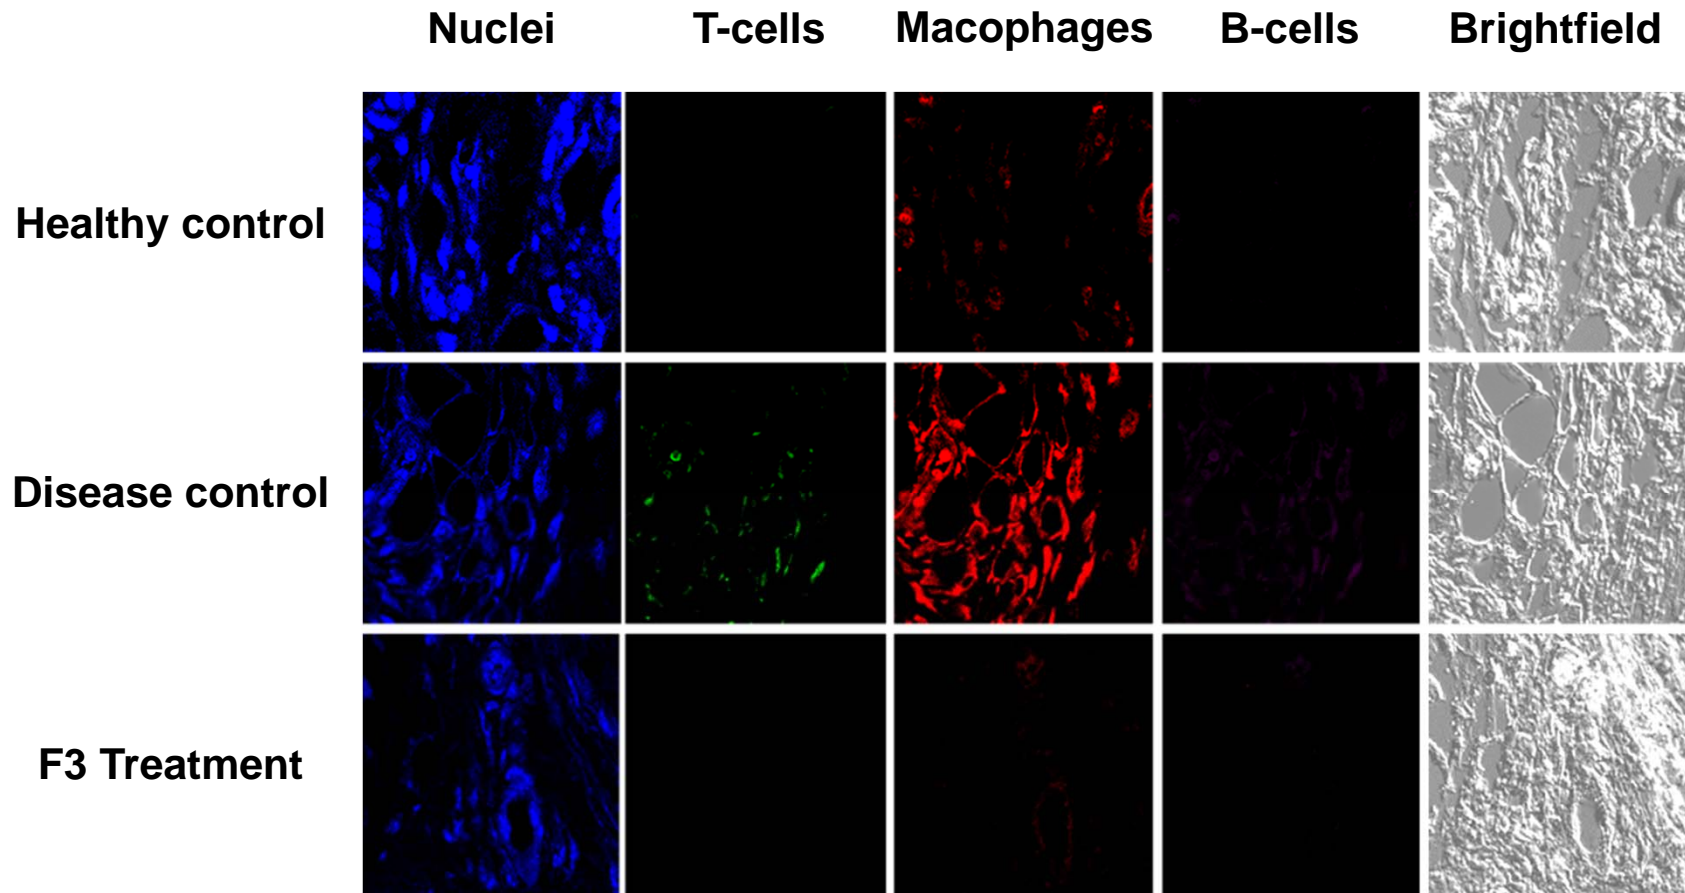

SI Figure 57. Immunofluorescent staining of different immune cell populations in thin sections of joints following F3 treatment in mice induced to develop arthritis (from **Fig. 6K**). Arthritis was induced as described in methods and F3 (20 mg/kg) was injected intraperitoneally (day 1) only after arthritis scores reached ~4. At the end of the study (day 18), sections of joint tissue were stained with cell specific markers and imaged via fluorescent microscopy.

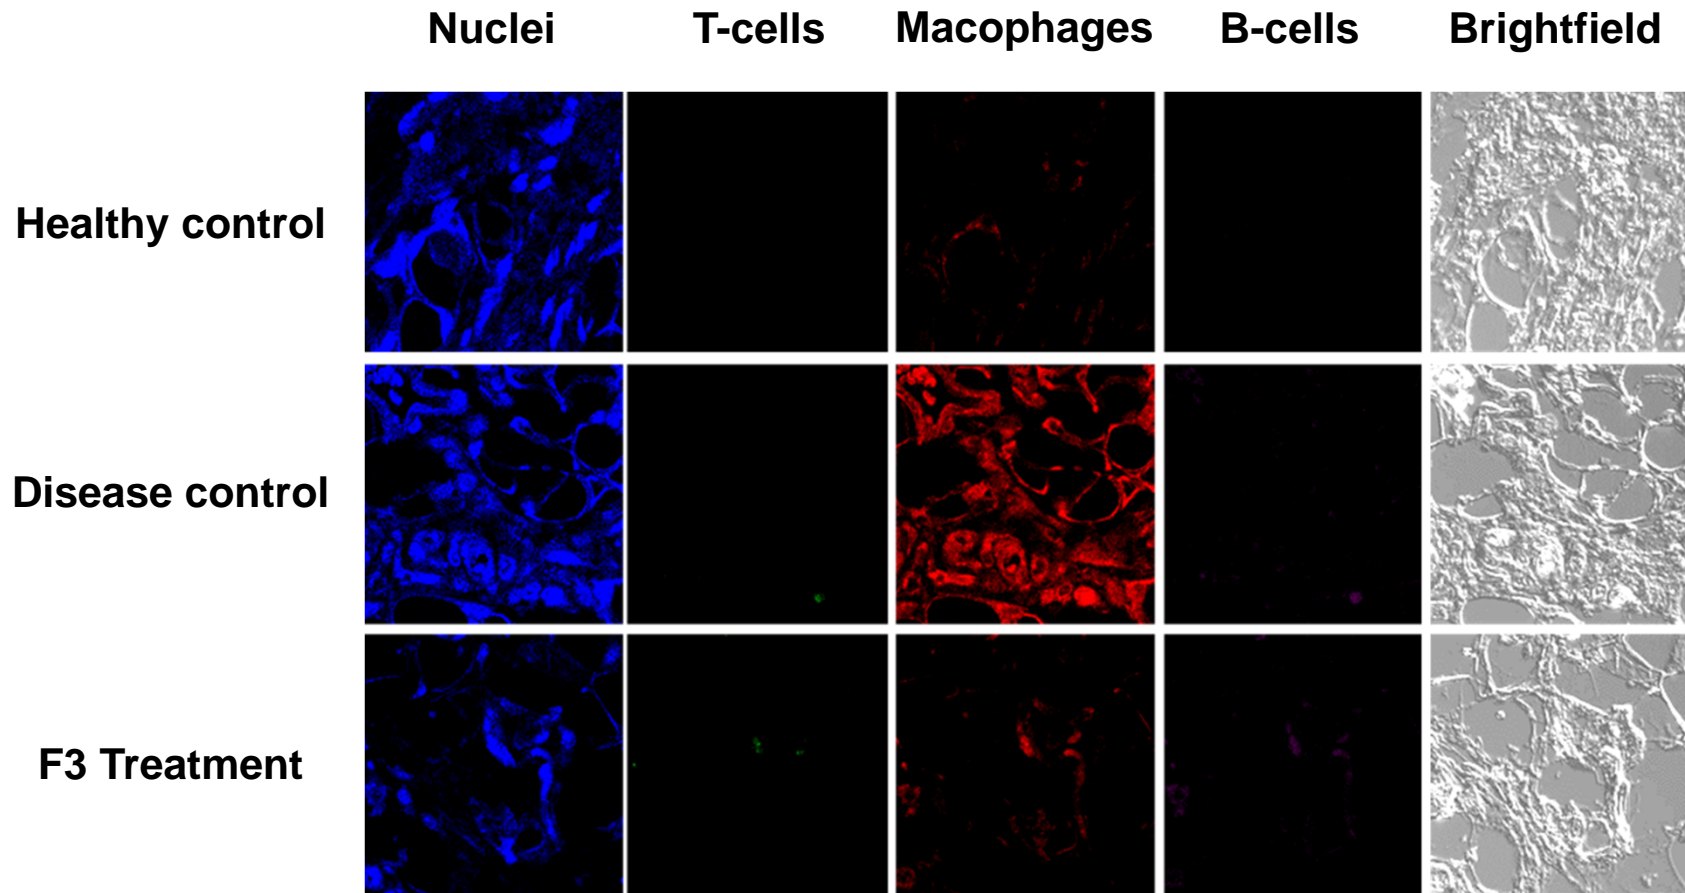

SI Figure 58. Immunofluorescent staining of different immune cell populations in thin sections of joints following F3 treatment in mice induced to develop arthritis (from **Fig. 6K**). Arthritis was induced as described in methods and F3 (20 mg/kg) was injected intraperitoneally (day 1) only after arthritis scores reached ~4. At the end of the study (day 18), sections of joint tissue were stained with cell specific markers and imaged via fluorescent microscopy.

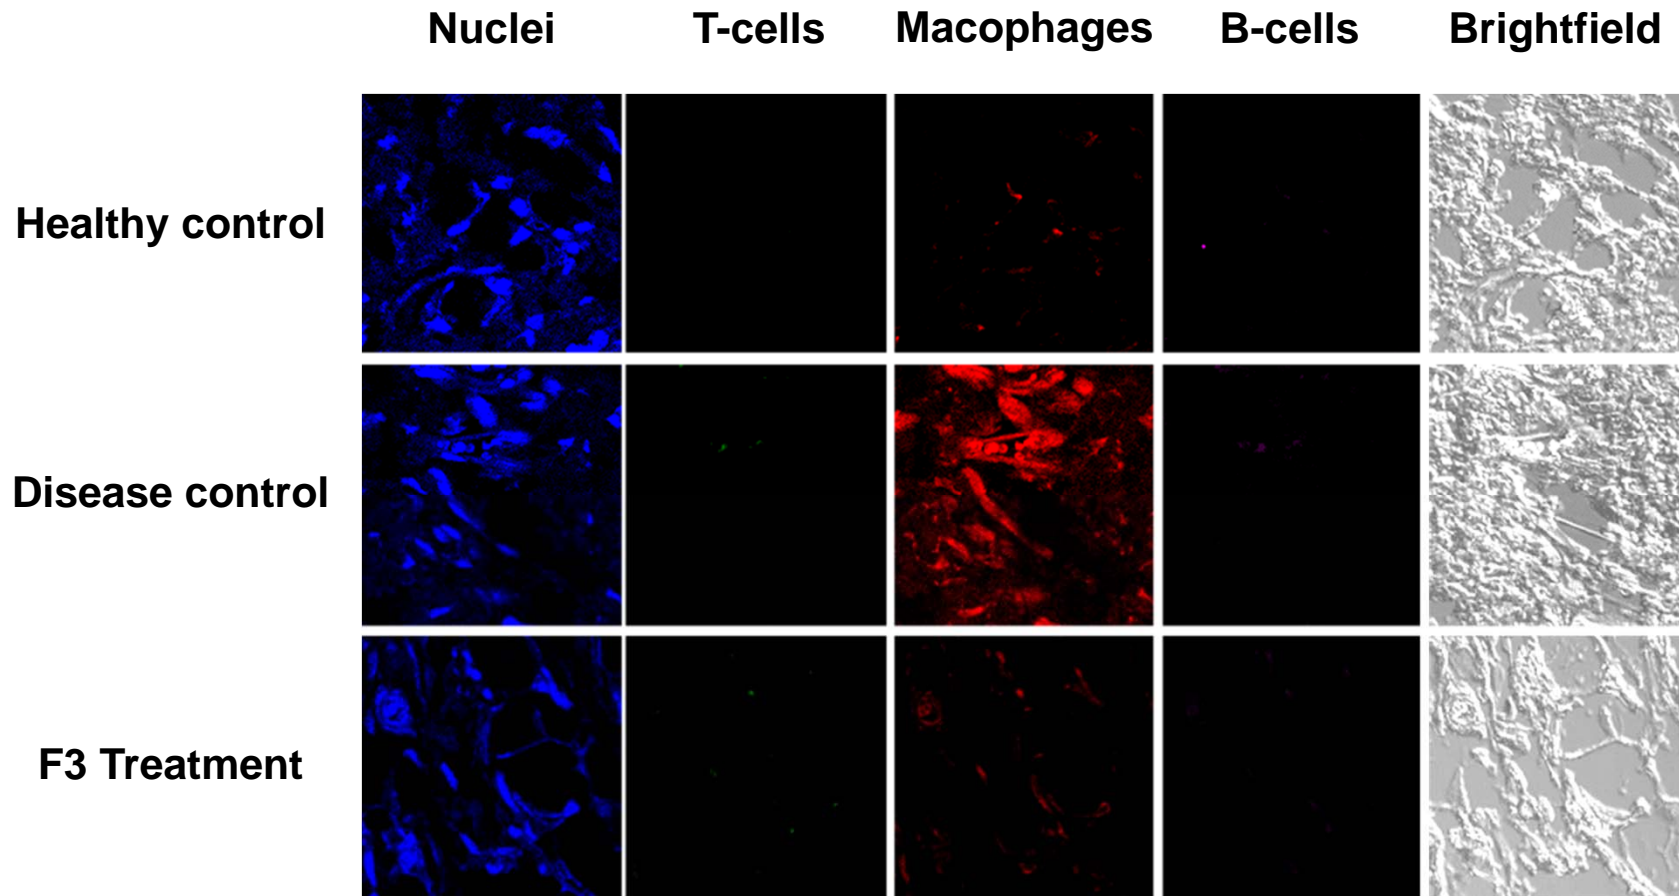

SI Figure 59. Immunofluorescent staining of different immune cell populations in thin sections of joints following F3 treatment in mice induced to develop arthritis (from **Fig. 6K**). Arthritis was induced as described in methods and F3 (20 mg/kg) was injected intraperitoneally (day 1) only after arthritis scores reached ~4. At the end of the study (day 18), sections of joint tissue were stained with cell specific markers and imaged via fluorescent microscopy.

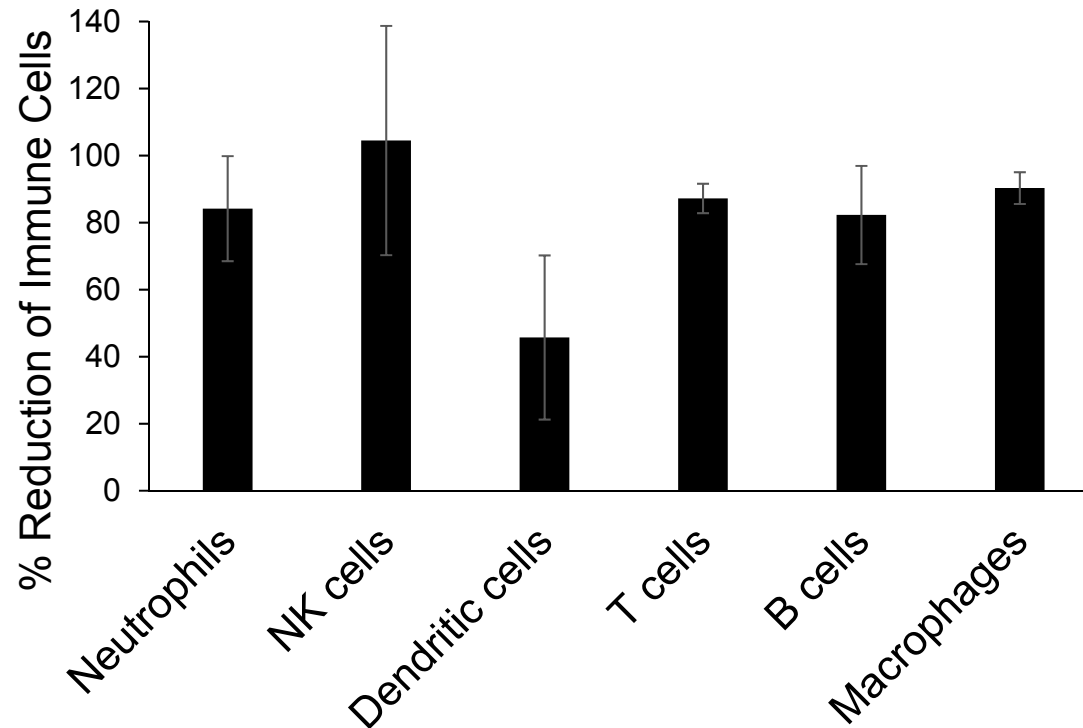

SI Figure 60. Percent reduction of different immune cell types in joint sections following F3 treatment in mice induced to develop arthritis (from **Fig. 6L**). Arthritis was induced as described in methods and F3 (20 mg/kg) was injected intraperitoneally (day 1) only after arthritis scores reached ~4. At the end of the study (day 18), sections of joint tissue were stained with cell specific markers and imaged via fluorescent microscopy. Staining intensity for each immune cell type was quantitated and the percent reduction in the number of each subpopulation of immune cells after treatment with F3 mAb was calculated where the average intensity in healthy and disease tissue was set at 100% and 0% reduction, respectively. Error bars represent standard error.

**Macrophages**  
**1-Way Anova**

|         | SS     | df | MS     | F     | p      |
|---------|--------|----|--------|-------|--------|
| Between | 564.51 | 2  | 282.25 | 11.18 | 0.0095 |
| Within  | 151.47 | 6  | 25.25  |       |        |
| Total   | 715.98 | 8  |        |       |        |

Tukey Test (p-value)

|         | Healthy | Disease | F3      |
|---------|---------|---------|---------|
| Healthy | -       | 0.0122  | 0.9000  |
| Disease |         | -       | 0.01925 |
| F3      |         |         | -       |

**Neutrophils**  
**1-Way Anova**

|         | SS    | df | MS    | F    | p      |
|---------|-------|----|-------|------|--------|
| Between | 21.67 | 2  | 10.84 | 8.68 | 0.0170 |
| Within  | 7.49  | 6  | 1.25  |      |        |
| Total   | 29.16 | 8  |       |      |        |

Tukey Test (p-value)

|         | Healthy | Disease | F3     |
|---------|---------|---------|--------|
| Healthy | -       | 0.0192  | 0.8050 |
| Disease |         | -       | 0.0393 |
| F3      |         |         | -      |

**NK cells**  
**1-Way Anova**

|         | SS   | df | MS   | F    | p      |
|---------|------|----|------|------|--------|
| Between | 0.30 | 2  | 0.15 | 3.97 | 0.0796 |
| Within  | 0.23 | 6  | 0.04 |      |        |
| Total   | 0.52 | 8  |      |      |        |

**T cells**  
**1-Way Anova**

|         | SS     | df | MS   | F     | p      |
|---------|--------|----|------|-------|--------|
| Between | 13,142 | 2  | 6571 | 33.15 | 0.0006 |
| Within  | 1,190  | 6  | 198  |       |        |
| Total   | 14,332 | 8  |      |       |        |

Tukey Test (p-value)

|         | Healthy | Disease | F3     |
|---------|---------|---------|--------|
| Healthy | -       | 0.0010  | 0.6241 |
| Disease |         | -       | 0.0015 |
| F3      |         |         | -      |

**B cells**  
**1-Way Anova**

|         | SS    | df | MS    | F    | p      |
|---------|-------|----|-------|------|--------|
| Between | 41.81 | 2  | 20.91 | 9.77 | 0.0130 |
| Within  | 12.84 | 6  | 2.14  |      |        |
| Total   | 54.65 | 8  |       |      |        |

Tukey Test (p-value)

|         | Healthy | Disease | F3      |
|---------|---------|---------|---------|
| Healthy | -       | 0.0142  | 0.7413  |
| Disease |         | -       | 0.03296 |
| F3      |         |         | -       |

**Dendritic cells**  
**1-Way Anova**

|         | SS    | df | MS   | F    | p      |
|---------|-------|----|------|------|--------|
| Between | 8.56  | 2  | 4.28 | 5.92 | 0.0381 |
| Within  | 4.34  | 6  | 0.72 |      |        |
| Total   | 12.91 | 8  |      |      |        |

Tukey Test (p-value)

|         | Healthy | Disease | F3      |
|---------|---------|---------|---------|
| Healthy | -       | 0.0319  | 0.2282  |
| Disease |         | -       | 0.32698 |
| F3      |         |         | -       |

SI Figure 61. Statistical analysis of differences in immune cell types in joint sections following F3 treatment in mice induced to develop arthritis (from **Fig. 6L**). Arthritis was induced as described in methods and F3 (20 mg/kg) was injected intraperitoneally (day 1) only after arthritis scores reached ~4. At the end of the study (day 18), sections of joint tissue were stained with cell specific markers and imaged via fluorescent microscopy. Staining intensity for each immune cell type was quantitated and a 1-way ANOVA followed by a post-hoc Tukey test was used to determine if there were any significant differences between groups. A p-value < 0.05 was considered significant and highlighted in yellow.



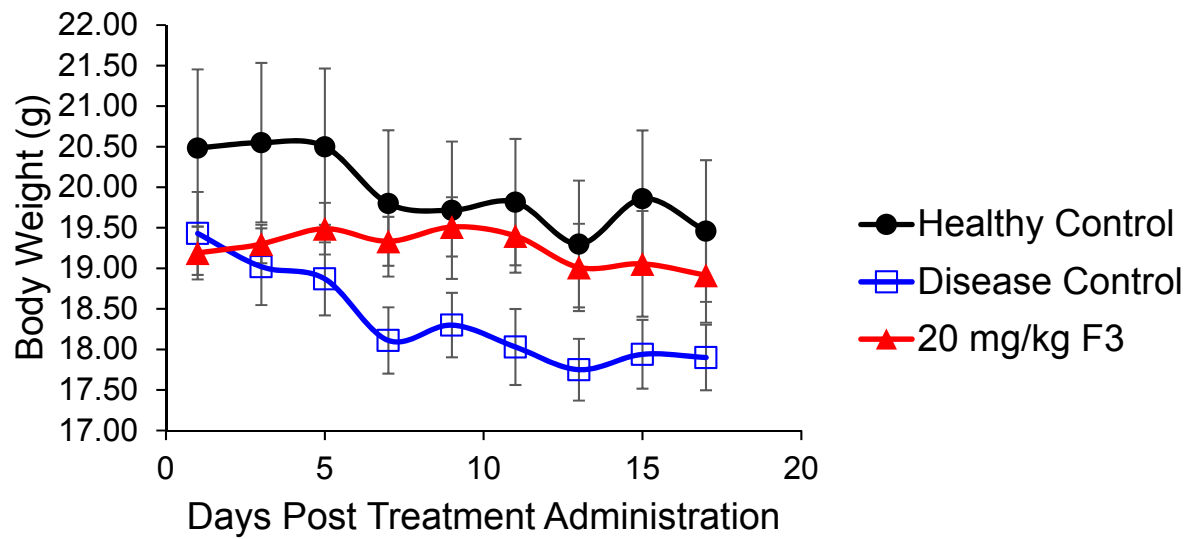

SI Figure 62. Changes in body weight following F3 treatment in mice induced to develop arthritis (from **Fig. 6**). Arthritis was induced as described in methods and F3 (20 mg/kg) was injected intraperitoneally (day 1) only after arthritis scores reached ~4. Body weight was recorded throughout the study. Error bars represent standard error.

### Healthy (Vehicle Control) - Body Weight (g)

|                    | Days  |       |       |       |       |       |       |       |       |
|--------------------|-------|-------|-------|-------|-------|-------|-------|-------|-------|
|                    | 1     | 3     | 5     | 7     | 9     | 11    | 13    | 15    | 17    |
| n                  | 6     | 6     | 6     | 6     | 6     | 6     | 6     | 6     | 6     |
| average            | 20.48 | 20.55 | 20.50 | 19.80 | 19.72 | 19.82 | 19.30 | 19.86 | 19.46 |
| standard deviation | 2.38  | 2.41  | 2.36  | 2.21  | 2.07  | 1.91  | 1.92  | 2.06  | 2.14  |
| standard error     | 0.97  | 0.98  | 0.96  | 0.90  | 0.85  | 0.78  | 0.78  | 0.84  | 0.87  |

### RA (Vehicle Control) - Body Weight (g)

|                    | Days  |       |       |       |       |       |       |       |       |
|--------------------|-------|-------|-------|-------|-------|-------|-------|-------|-------|
|                    | 1     | 3     | 5     | 7     | 9     | 11    | 13    | 15    | 17    |
| n                  | 10    | 10    | 10    | 10    | 10    | 10    | 10    | 10    | 10    |
| average            | 19.43 | 19.02 | 18.87 | 18.11 | 18.30 | 18.03 | 17.75 | 17.94 | 17.90 |
| standard deviation | 1.62  | 1.50  | 1.42  | 1.29  | 1.26  | 1.48  | 1.20  | 1.34  | 1.28  |
| standard error     | 0.51  | 0.47  | 0.45  | 0.41  | 0.40  | 0.47  | 0.38  | 0.42  | 0.40  |

### 20 mg/kg F3 - Body Weight (g)

|                    | Days  |       |       |       |       |       |       |       |       |
|--------------------|-------|-------|-------|-------|-------|-------|-------|-------|-------|
|                    | 1     | 3     | 5     | 7     | 9     | 11    | 13    | 15    | 17    |
| n                  | 10    | 10    | 10    | 10    | 10    | 10    | 10    | 10    | 10    |
| average            | 19.19 | 19.30 | 19.49 | 19.33 | 19.51 | 19.40 | 19.01 | 19.06 | 18.91 |
| standard deviation | 1.03  | 0.75  | 1.01  | 0.96  | 1.16  | 1.43  | 1.70  | 2.06  | 1.85  |
| standard error     | 0.33  | 0.24  | 0.32  | 0.30  | 0.37  | 0.45  | 0.54  | 0.65  | 0.58  |

SI Figure 63. Comparison of body weight following F3 treatment in mice induced to develop arthritis (from **Fig. 6**). Arthritis was induced as described in methods and F3 (20 mg/kg) was injected intraperitoneally (day 1) only after arthritis scores reached ~4. Table provides body weight measurements as a function of time.

### 1-way ANOVA - Body Weight

|                                      | Day    |       |      |        |       |      |        |       |      |        |       |      |        |       |      |        |       |      |        |       |      |        |       |      |        |       |      |
|--------------------------------------|--------|-------|------|--------|-------|------|--------|-------|------|--------|-------|------|--------|-------|------|--------|-------|------|--------|-------|------|--------|-------|------|--------|-------|------|
|                                      | 1      |       |      | 3      |       |      | 5      |       |      | 7      |       |      | 9      |       |      | 11     |       |      | 13     |       |      | 15     |       |      | 17     |       |      |
| SS (Between   Within   Total)        | 7.6    | 61.4  | 68.9 | 10.5   | 58.4  | 68.8 | 10.4   | 60.2  | 70.6 | 11.3   | 53.5  | 64.8 | 8.6    | 52.6  | 61.2 | 13.0   | 62.0  | 75.0 | 9.1    | 59.6  | 68.8 | 12.5   | 75.0  | 87.5 | 8.2    | 61.5  | 69.6 |
| df (Between   Within   Total)        | 2      | 23    | 25   | 2      | 23    | 25   | 2      | 23    | 25   | 2      | 23    | 25   | 2      | 23    | 25   | 2      | 23    | 25   | 2      | 23    | 25   | 2      | 23    | 25   | 2      | 23    | 25   |
| MS (Between   Within)                | 3.788  | 2.668 |      | 5.233  | 2.538 |      | 5.176  | 2.619 |      | 5.663  | 2.326 |      | 4.303  | 2.287 |      | 6.503  | 2.696 |      | 4.568  | 2.710 |      | 6.241  | 3.409 |      | 4.092  | 3.073 |      |
| F                                    | 1.420  |       |      | 2.062  |       |      | 1.976  |       |      | 2.435  |       |      | 1.882  |       |      | 2.412  |       |      | 1.685  |       |      | 1.831  |       |      | 1.332  |       |      |
| p-value                              | 0.2622 |       |      | 0.1501 |       |      | 0.1614 |       |      | 0.1099 |       |      | 0.1751 |       |      | 0.1119 |       |      | 0.2085 |       |      | 0.1839 |       |      | 0.2864 |       |      |
| <b>post-hoc Tukey Test (p-value)</b> |        |       |      |        |       |      |        |       |      |        |       |      |        |       |      |        |       |      |        |       |      |        |       |      |        |       |      |
| Healthy vs. Disease                  | -      | -     | -    | -      | -     | -    | -      | -     | -    | -      | -     | -    | -      | -     | -    | -      | -     | -    | -      | -     | -    | -      | -     | -    | -      | -     | -    |
| Healthy vs. F3 (20 mg/kg)            | -      | -     | -    | -      | -     | -    | -      | -     | -    | -      | -     | -    | -      | -     | -    | -      | -     | -    | -      | -     | -    | -      | -     | -    | -      | -     | -    |
| Disease vs. F3 (20 mg/kg)            | -      | -     | -    | -      | -     | -    | -      | -     | -    | -      | -     | -    | -      | -     | -    | -      | -     | -    | -      | -     | -    | -      | -     | -    | -      | -     | -    |

SI Figure 64. Statistical analysis of differences in body weight following F3 treatment in mice induced to develop arthritis (from **Fig. 6**). Arthritis was induced as described in methods and F3 (20 mg/kg) was injected intraperitoneally (day 1) only after arthritis scores reached ~4. A 1-way ANOVA followed by a post-hoc Tukey test was used to determine if there were any significant differences in body weight between groups. A p-value < 0.05 was considered significant and highlighted in yellow.

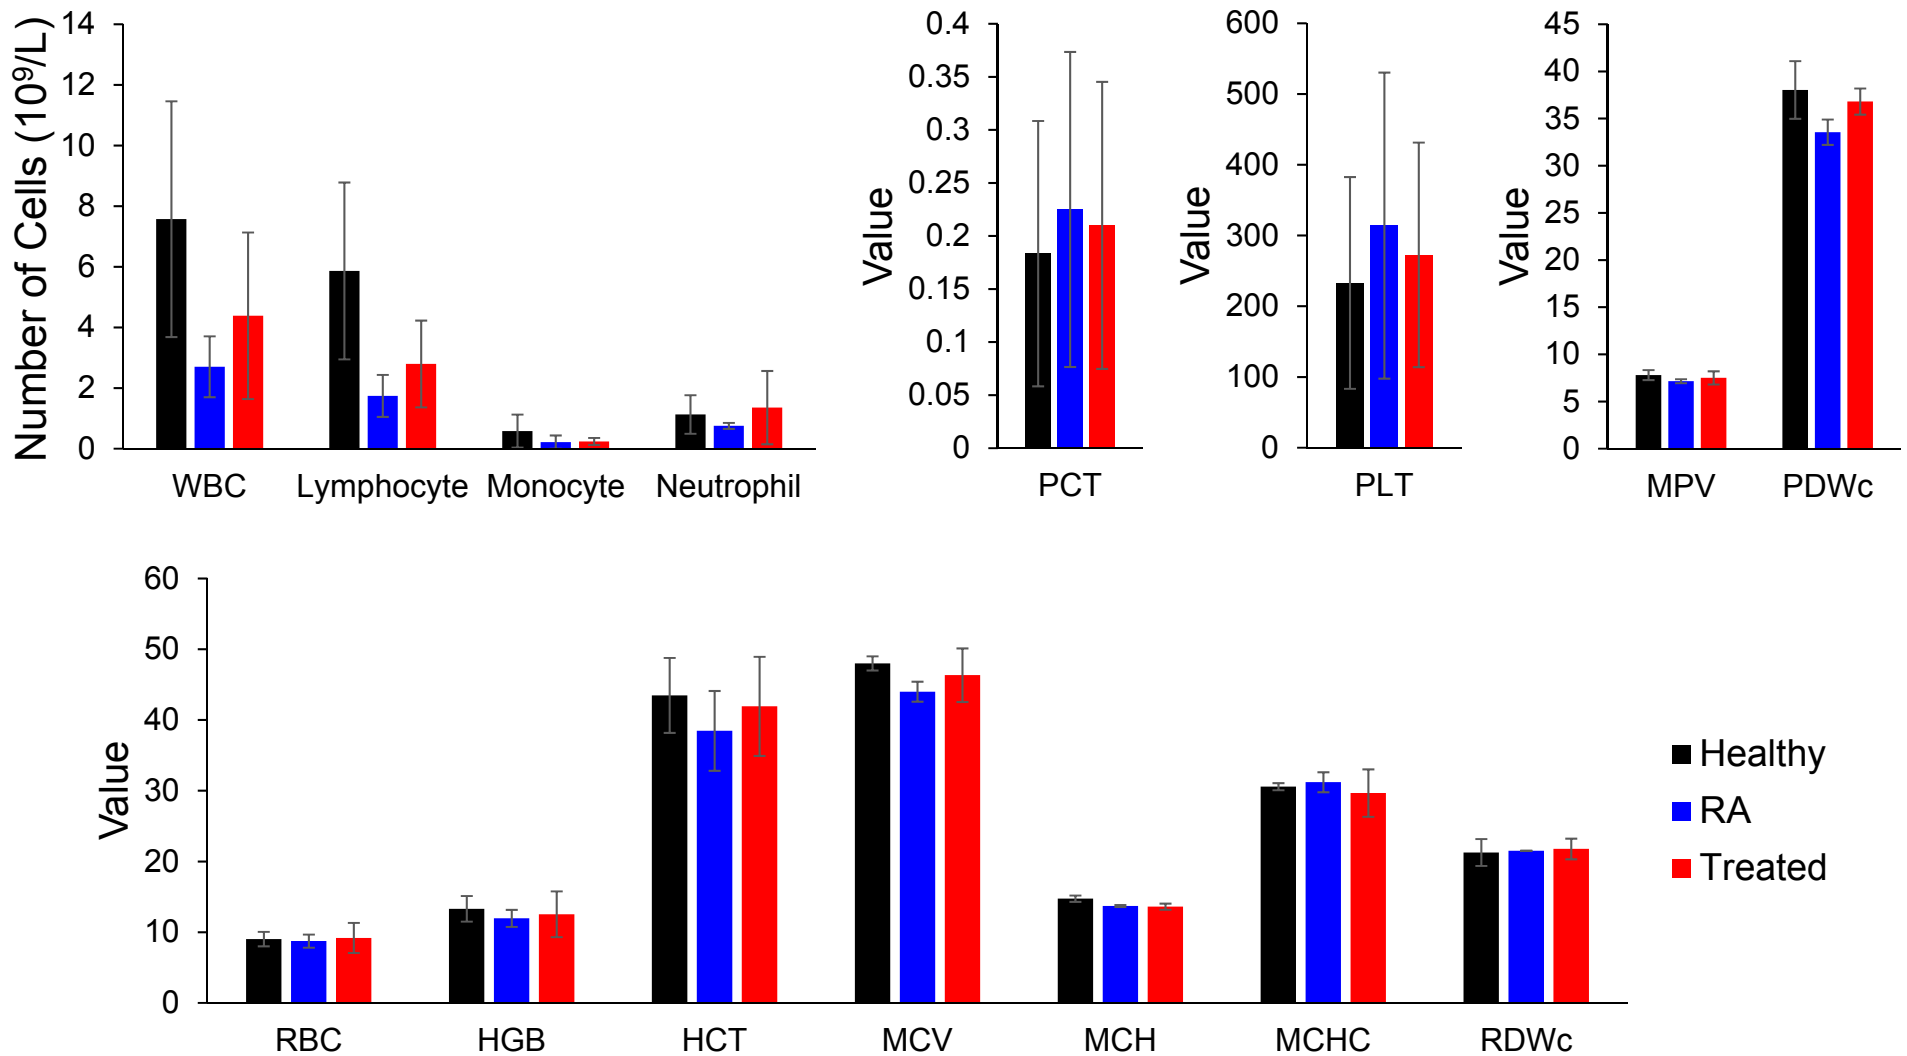

SI Figure 65. Changes in complete blood count values following F3 treatment in mice induced to develop arthritis (from **Fig. 6**). Arthritis was induced as described in methods and F3 (20 mg/kg) was injected intraperitoneally (day 1) only after arthritis scores reached ~4. On Day 18, mice were sacrificed and a complete blood count was performed including total white blood cells, lymphocytes, monocytes, neutrophils, red blood cells (RBC), hemoglobin (HGB), hematocrit (HCT), mean corpuscular volume (MCV), mean corpuscular hemoglobin (MCH), mean corpuscular hemoglobin concentration (MCHC), red cell distribution width (RDWc), platelets (PLT), platelet hematocrit (PCT), mean platelet volume (MPV), and platelet distribution width (PDWc). Error bars represent standard deviation.

| White Blood Cell Number<br>1-Way Anova |       |    |       |      |        |
|----------------------------------------|-------|----|-------|------|--------|
|                                        | SS    | df | MS    | F    | p      |
| Between                                | 31.34 | 2  | 15.67 | 1.69 | 0.2750 |
| Within                                 | 46.36 | 6  | 9.27  |      |        |
| Total                                  | 77.69 | 8  |       |      |        |

| HGB<br>1-Way Anova |       |    |      |      |        |
|--------------------|-------|----|------|------|--------|
|                    | SS    | df | MS   | F    | p      |
| Between            | 2.28  | 2  | 1.14 | 0.20 | 0.8268 |
| Within             | 28.89 | 6  | 5.78 |      |        |
| Total              | 31.18 | 8  |      |      |        |

| MCHC<br>1-Way Anova |       |    |      |      |        |
|---------------------|-------|----|------|------|--------|
|                     | SS    | df | MS   | F    | p      |
| Between             | 2.98  | 2  | 1.49 | 0.30 | 0.7546 |
| Within              | 24.95 | 6  | 4.99 |      |        |
| Total               | 27.93 | 8  |      |      |        |

| Lymphocyte Number<br>1-Way Anova |       |    |       |      |        |
|----------------------------------|-------|----|-------|------|--------|
|                                  | SS    | df | MS    | F    | p      |
| Between                          | 24.19 | 2  | 12.09 | 2.80 | 0.1530 |
| Within                           | 21.61 | 6  | 4.32  |      |        |
| Total                            | 45.80 | 8  |       |      |        |

| HCT<br>1-Way Anova |        |    |       |      |        |
|--------------------|--------|----|-------|------|--------|
|                    | SS     | df | MS    | F    | p      |
| Between            | 30.60  | 2  | 15.30 | 0.41 | 0.6835 |
| Within             | 186.13 | 6  | 37.23 |      |        |
| Total              | 216.73 | 8  |       |      |        |

| RDWc<br>1-Way Anova |       |    |      |      |        |
|---------------------|-------|----|------|------|--------|
|                     | SS    | df | MS   | F    | p      |
| Between             | 0.38  | 2  | 0.19 | 0.08 | 0.9227 |
| Within              | 11.47 | 6  | 2.30 |      |        |
| Total               | 11.85 | 8  |      |      |        |

| Monocyte Number<br>1-Way Anova |      |    |      |      |        |
|--------------------------------|------|----|------|------|--------|
|                                | SS   | df | MS   | F    | p      |
| Between                        | 0.23 | 2  | 0.12 | 0.87 | 0.4723 |
| Within                         | 0.67 | 6  | 0.13 |      |        |
| Total                          | 0.90 | 8  |      |      |        |

| MCV<br>1-Way Anova |       |    |      |      |        |
|--------------------|-------|----|------|------|--------|
|                    | SS    | df | MS   | F    | p      |
| Between            | 19.21 | 2  | 6.90 | 1.47 | 0.3147 |
| Within             | 32.67 | 6  | 6.53 |      |        |
| Total              | 51.88 | 8  |      |      |        |

| PLT<br>1-Way Anova |         |    |       |      |        |
|--------------------|---------|----|-------|------|--------|
|                    | SS      | df | MS    | F    | p      |
| Between            | 7,972   | 2  | 3986  | 0.14 | 0.8724 |
| Within             | 142,068 | 6  | 28413 |      |        |
| Total              | 150,041 | 8  |       |      |        |

| Neutrophil Number<br>1-Way Anova |      |    |      |      |        |
|----------------------------------|------|----|------|------|--------|
|                                  | SS   | df | MS   | F    | p      |
| Between                          | 0.44 | 2  | 0.22 | 0.29 | 0.7587 |
| Within                           | 3.74 | 6  | 0.75 |      |        |
| Total                            | 4.18 | 8  |      |      |        |

| MCH<br>1-Way Anova |      |    |      |      |        |
|--------------------|------|----|------|------|--------|
|                    | SS   | df | MS   | F    | p      |
| Between            | 2.25 | 2  | 1.13 | 6.98 | 0.0357 |
| Within             | 0.81 | 6  | 0.16 |      |        |
| Total              | 3.06 | 8  |      |      |        |

| PCT<br>1-Way Anova |        |    |        |      |        |
|--------------------|--------|----|--------|------|--------|
|                    | SS     | df | MS     | F    | p      |
| Between            | 0.0023 | 2  | 0.0011 | 0.06 | 0.9396 |
| Within             | 0.0899 | 6  | 0.0180 |      |        |
| Total              | 0.0922 | 8  |        |      |        |

| RBC<br>1-Way Anova |       |    |      |      |        |
|--------------------|-------|----|------|------|--------|
|                    | SS    | df | MS   | F    | p      |
| Between            | 0.25  | 2  | 0.12 | 0.05 | 0.9505 |
| Within             | 11.97 | 6  | 2.39 |      |        |
| Total              | 12.21 | 8  |      |      |        |

| Tukey   |         |        |         |
|---------|---------|--------|---------|
|         | Healthy | RA     | Treated |
| Healthy | -       | 0.0803 | 0.0402  |
| RA      |         | -      | 0.9000  |
| Treated |         |        | -       |

| MPV<br>1-Way Anova |      |    |      |      |        |
|--------------------|------|----|------|------|--------|
|                    | SS   | df | MS   | F    | p      |
| Between            | 0.51 | 2  | 0.26 | 0.80 | 0.4979 |
| Within             | 1.59 | 6  | 0.32 |      |        |
| Total              | 2.10 | 8  |      |      |        |

| PDWc<br>1-Way Anova |       |    |       |      |        |
|---------------------|-------|----|-------|------|--------|
|                     | SS    | df | MS    | F    | p      |
| Between             | 24.71 | 2  | 12.35 | 2.53 | 0.1738 |
| Within              | 24.37 | 6  | 4.87  |      |        |
| Total               | 49.08 | 8  |       |      |        |

SI Figure 66. Statistical analysis of differences in complete blood count values following F3 treatment in mice induced to develop arthritis (from **Fig. 6**). Arthritis was induced as described in methods and F3 (20 mg/kg) was injected intraperitoneally (day 1) only after arthritis scores reached ~4. On Day 18, mice were sacrificed and a complete blood count was performed including total white blood cells, lymphocytes, monocytes, neutrophils, red blood cells (RBC), hemoglobin (HGB), hematocrit (HCT), mean corpuscular volume (MCV), mean corpuscular hemoglobin (MCH), mean corpuscular hemoglobin concentration (MCHC), red cell distribution width (RDWc), platelets (PLT), platelet hematocrit (PCT), mean platelet volume (MPV), and platelet distribution width (PDWc). A 1-way ANOVA followed by a post-hoc Tukey test was used to determine if there were any significant differences between groups. A p-value < 0.05 was considered significant and highlighted in yellow.
